# Supplementary material for: ZFP36-family RNA-binding proteins in regulatory T cells reinforce immune homeostasis.
Source: Research Square preprint supplement (doi:10.21203/rs.3.rs-5039504/v1), 2024-10-07
Supplement: Supplementary file 1 [file 2169ffba5ef43ac3ff2e54fa.xlsx]

## Sheet: Table S1 DE_genes_increased
Gene	Mean normalised read count	Log2 fold change	lfcSE	Wald statistic	p value	FDR-adjusted p value	Treg signature	CLIP target
Slc35d1	1481.9	1.37604	0.12638	10.8838	1.37671e-27	5.13788e-24	TRUE	FALSE
Gtf2i	6320.96	1.03173	0.097184	10.6154	2.52614e-26	7.54204e-23	FALSE	FALSE
Ntn4	490.691	2.03973	0.215766	9.47415	2.68951e-21	5.73557e-18	FALSE	FALSE
Wbp2	5629.62	0.978485	0.117253	8.34387	7.18955e-17	1.19251e-13	FALSE	FALSE
Gm20429	41.1813	1.46586	0.219564	7.74387	9.64335e-15	1.10735e-11	FALSE	FALSE
Gm15915	263.032	1.66282	0.229235	7.37509	1.64237e-13	1.75123e-10	FALSE	FALSE
Ehd3	3679.17	1.42595	0.196897	7.23483	4.6613e-13	4.34899e-10	FALSE	FALSE
H2-T3	73.6593	1.00641	0.20135	7.10688	1.18699e-12	9.326e-10	FALSE	FALSE
Mthfd2	2651.45	0.778198	0.114028	6.82392	8.85895e-12	5.74984e-09	FALSE	TRUE
Cd7	2344.42	0.901178	0.132331	6.80843	9.86692e-12	5.89173e-09	FALSE	FALSE
Matn2	185.111	1.3007	0.193849	6.6959	2.14345e-11	1.18509e-08	TRUE	FALSE
Pitpnc1	2582.81	0.617125	0.0927426	6.65388	2.85468e-11	1.52195e-08	FALSE	FALSE
H2-T22	5301.79	0.58681	0.0909714	6.45028	1.11646e-10	5.20828e-08	FALSE	FALSE
Sycp1	7.2249	1.15331	0.208921	6.38576	1.7055e-10	7.07213e-08	FALSE	FALSE
Serpini1	1133.1	0.841936	0.134632	6.25223	4.04623e-10	1.43815e-07	FALSE	FALSE
Ikzf3	681.438	0.809765	0.129454	6.25404	3.99969e-10	1.43815e-07	TRUE	TRUE
Iigp1	3039.56	0.907801	0.145533	6.23573	4.49664e-10	1.56107e-07	TRUE	FALSE
H2-T24	1019.6	0.827022	0.134345	6.15431	7.54058e-10	2.4612e-07	FALSE	FALSE
Arl4c	496.602	0.734325	0.119888	6.12364	9.14596e-10	2.84439e-07	FALSE	FALSE
Igf2r	8932.4	0.797597	0.134125	5.94555	2.75522e-09	7.76036e-07	TRUE	TRUE
Rptor	267.698	0.823316	0.138773	5.93031	3.02369e-09	8.20683e-07	FALSE	TRUE
Cd200	4806.01	0.807475	0.137087	5.88905	3.8842e-09	1.03542e-06	TRUE	TRUE
Rad51b	165.581	1.3212	0.22477	5.8819	4.05581e-09	1.0622e-06	FALSE	FALSE
Tmem87a	618.708	1.29248	0.228475	5.68967	1.27286e-08	3.17939e-06	FALSE	TRUE
Rtkn2	41.357	1.28088	0.230328	5.60623	2.06782e-08	4.89974e-06	FALSE	FALSE
Hal	18.0347	0.937727	0.202602	5.51781	3.43256e-08	7.88328e-06	FALSE	FALSE
Cxcr4	387.189	0.777833	0.14233	5.46348	4.66891e-08	1.05602e-05	FALSE	FALSE
Gm11775	377.828	0.823559	0.151235	5.44245	5.25514e-08	1.17088e-05	FALSE	FALSE
Parm1	12.8437	0.510361	0.160571	5.35166	8.7151e-08	1.88549e-05	FALSE	FALSE
4833439L19Rik	2724.23	0.550187	0.103161	5.33301	9.65963e-08	2.05999e-05	FALSE	FALSE
Gsta4	2692.44	1.0069	0.190128	5.29082	1.21767e-07	2.42619e-05	FALSE	FALSE
Gm19684	64.811	1.19346	0.225201	5.29063	1.21894e-07	2.42619e-05	FALSE	FALSE
Foxn2	510.273	0.914565	0.172706	5.29168	1.212e-07	2.42619e-05	FALSE	TRUE
Olfr98	4.45199	0.822466	0.191126	5.22574	1.7346e-07	3.36287e-05	FALSE	FALSE
Pea15a	3128.9	0.713366	0.137649	5.18151	2.20098e-07	4.15902e-05	FALSE	FALSE
Btg2	8748.25	0.645018	0.124834	5.16642	2.38623e-07	4.3441e-05	FALSE	TRUE
Rin2	5.78859	0.830887	0.193079	5.16766	2.37037e-07	4.3441e-05	FALSE	FALSE
Mlx	3272.33	0.411849	0.0799204	5.15316	2.56131e-07	4.60666e-05	FALSE	TRUE
Ppp1r3f	703.95	0.834299	0.161884	5.15077	2.59426e-07	4.61037e-05	FALSE	FALSE
Lbh	1099.82	0.917982	0.178714	5.13263	2.85722e-07	4.9596e-05	FALSE	TRUE
A530021J07Rik	318.276	1.06903	0.208194	5.12722	2.94054e-07	5.04556e-05	FALSE	FALSE
Hdac1	5895.34	0.453222	0.0886207	5.11408	3.15268e-07	5.34809e-05	FALSE	TRUE
Trib3	334.029	0.853427	0.167721	5.08527	3.67104e-07	6.08903e-05	FALSE	FALSE
Pcna-ps2	83.5409	1.0916	0.22522	5.05697	4.25971e-07	6.91184e-05	FALSE	FALSE
Slc23a4	48.494	1.13706	0.224251	5.05155	4.38244e-07	6.95969e-05	FALSE	FALSE
Lat	23530	0.784584	0.155254	5.05181	4.37637e-07	6.95969e-05	FALSE	TRUE
Cdkn2d	4599.22	0.611959	0.124075	4.93166	8.15347e-07	0.000119328	FALSE	TRUE
Itga6	984.981	0.687086	0.139651	4.91905	8.69656e-07	0.00012364	FALSE	FALSE
Ciapin1	2378.99	0.479928	0.0980882	4.89265	9.94878e-07	0.000137547	FALSE	TRUE
Als2cl	2314.63	1.02009	0.208234	4.8926	9.95118e-07	0.000137547	FALSE	TRUE
Gdpd3	506.53	0.36836	0.143193	4.88808	1.01825e-06	0.000139453	FALSE	FALSE
Gm26892	28.3055	1.07867	0.227325	4.84273	1.28065e-06	0.000168941	FALSE	FALSE
Dusp10	1942.6	0.841181	0.173645	4.84127	1.29015e-06	0.000168941	FALSE	FALSE
Ppwd1	370.547	0.945898	0.195075	4.84347	1.27593e-06	0.000168941	FALSE	FALSE
Gimap3	52843.5	0.526319	0.109083	4.82468	1.40229e-06	0.00018046	FALSE	TRUE
Kdm7a	702.06	0.834599	0.173075	4.81936	1.44018e-06	0.000183752	FALSE	TRUE
Ckb	848.949	0.96634	0.20102	4.80132	1.57623e-06	0.000194467	FALSE	TRUE
Sfmbt1	291.11	0.857504	0.178459	4.80132	1.57626e-06	0.000194467	FALSE	TRUE
Actn2	307.47	0.996115	0.209221	4.75484	1.98606e-06	0.0002353	FALSE	FALSE
Inafm2	65.0336	1.07099	0.224981	4.74929	2.04137e-06	0.000239949	FALSE	FALSE
Stx7	1747.82	0.623405	0.133809	4.65826	3.18895e-06	0.000355259	FALSE	FALSE
Tmie	182.334	1.04585	0.226471	4.6188	3.85971e-06	0.00042366	FALSE	FALSE
Rap2c	767.808	0.411244	0.0901209	4.5632	5.03799e-06	0.000529628	FALSE	TRUE
Tex35	74.531	0.794968	0.201753	4.53177	5.84927e-06	0.000602192	FALSE	FALSE
Cers4	1937.44	0.796553	0.176653	4.50621	6.59955e-06	0.000665663	FALSE	FALSE
Cdc42se1	12241.7	0.424056	0.0941905	4.50201	6.73153e-06	0.000674418	FALSE	TRUE
4930599N23Rik	33.3699	0.965837	0.214267	4.49177	7.06349e-06	0.000698303	FALSE	FALSE
Nod2	45.308	0.577959	0.175075	4.45125	8.53725e-06	0.000832968	FALSE	FALSE
Tmprss13	7.86908	0.54534	0.168248	4.4364	9.14747e-06	0.000875342	FALSE	FALSE
Igsf23	1121.53	0.65926	0.149417	4.411	1.02893e-05	0.00095999	FALSE	FALSE
Pank3	215.731	0.712825	0.161458	4.4122	1.02323e-05	0.00095999	FALSE	TRUE
Ifng	58.4351	1.00908	0.229403	4.40278	1.06872e-05	0.00099092	FALSE	TRUE
Mmp9	72.9773	1.00583	0.230007	4.38562	1.15654e-05	0.00105723	FALSE	FALSE
A930015D03Rik	202.834	1.00011	0.229975	4.36128	1.29302e-05	0.00116983	FALSE	FALSE
Gimap4	48476.4	0.634511	0.146634	4.32623	1.51681e-05	0.00132415	FALSE	FALSE
Bin2	23331.3	0.384854	0.0892442	4.3123	1.61567e-05	0.00140225	FALSE	FALSE
Kifc5b	30.4316	0.990336	0.230333	4.30502	1.66968e-05	0.00144075	FALSE	FALSE
Tex14	6.50091	0.471894	0.158102	4.29571	1.74131e-05	0.00149393	FALSE	FALSE
Gm4951	194.264	0.962866	0.224213	4.28816	1.80156e-05	0.00153678	FALSE	FALSE
Gm10093	799.512	0.424206	0.0990206	4.28384	1.83692e-05	0.00155804	FALSE	FALSE
Lipm	8.88001	0.660103	0.18461	4.25069	2.13114e-05	0.00176742	FALSE	FALSE
Itih5	2279.97	0.791522	0.186329	4.24456	2.19022e-05	0.00178665	TRUE	TRUE
Man1a	1000.57	0.951517	0.224219	4.24076	2.22762e-05	0.00180728	FALSE	TRUE
Mgat5	251.492	0.672359	0.159082	4.22506	2.38876e-05	0.00192753	TRUE	TRUE
Gm9008	8.98341	0.594428	0.175251	4.21439	2.50457e-05	0.00201012	FALSE	FALSE
Ifi204	173.969	0.350748	0.141716	4.21205	2.53064e-05	0.00202018	FALSE	FALSE
Ifi211	9.59205	0.762988	0.200181	4.19592	2.71769e-05	0.00214654	FALSE	FALSE
Agpat3	4033.35	0.427176	0.102124	4.18278	2.87964e-05	0.00226249	FALSE	TRUE
Ccnd3	6752.17	0.707403	0.169168	4.17972	2.91868e-05	0.00226928	FALSE	TRUE
Thada	2703.21	0.739975	0.177338	4.17017	3.04379e-05	0.00234215	FALSE	TRUE
Cldn10	238.289	0.946159	0.22709	4.16575	3.10329e-05	0.00237569	FALSE	FALSE
Ypel5	3601.52	0.458518	0.110315	4.15626	3.23493e-05	0.00246383	FALSE	FALSE
Aip	6891.98	0.491881	0.118452	4.15229	3.29172e-05	0.00247813	FALSE	FALSE
Klf3	1837.17	0.645481	0.155923	4.13856	3.49498e-05	0.00259111	FALSE	TRUE
Tlr7	882.036	0.643167	0.155387	4.13782	3.50619e-05	0.00259111	TRUE	FALSE
Paip1	121.918	0.932339	0.229266	4.10721	4.00475e-05	0.00294497	FALSE	TRUE
Ube2b	5975.84	0.433196	0.105748	4.09636	4.19704e-05	0.00302742	FALSE	TRUE
Gimap7	11022.2	0.745541	0.183281	4.06492	4.80488e-05	0.00341558	TRUE	FALSE
Slfn1	10483.5	0.458498	0.11277	4.06557	4.79146e-05	0.00341558	FALSE	FALSE
Casp8	13938	0.333014	0.082178	4.05231	5.07145e-05	0.00357107	FALSE	TRUE
Cd81	5875.13	0.506177	0.125041	4.04774	5.17144e-05	0.00362438	TRUE	FALSE
Ecm1	18022.2	0.561965	0.139403	4.03059	5.56376e-05	0.00384518	TRUE	FALSE
D930028M14Rik	159.568	0.833408	0.207214	4.01567	5.92774e-05	0.00404061	FALSE	FALSE
Egr2	1126.47	0.68892	0.171887	4.00587	6.17893e-05	0.00413628	TRUE	TRUE
Gm16212	3.18881	0.487741	0.159407	3.98362	6.78729e-05	0.00446347	FALSE	FALSE
2010107G23Rik	32.3944	0.877835	0.225132	3.97571	7.01688e-05	0.00456605	FALSE	FALSE
Rab27a	965.225	0.796518	0.201241	3.95333	7.70712e-05	0.00495913	FALSE	FALSE
Zfyve16	379.699	0.688652	0.177593	3.87537	0.000106463	0.00648685	FALSE	FALSE
Igsf3	154.066	0.813896	0.20993	3.86932	0.000109141	0.00658067	FALSE	FALSE
Cox17	1810.88	0.62232	0.160762	3.86975	0.000108947	0.00658067	FALSE	TRUE
Pygm	162.467	0.764023	0.198554	3.84335	0.000121366	0.00716104	FALSE	FALSE
Gm9967	98.7673	0.378421	0.148297	3.83669	0.000124706	0.00730293	FALSE	FALSE
Mapkbp1	95.0009	0.87716	0.230289	3.82258	0.000132061	0.0076411	FALSE	FALSE
Zfp831	255.138	0.129867	0.195788	3.81747	0.000134828	0.00777111	FALSE	FALSE
Lats2	694.281	0.839882	0.219939	3.81329	0.000137127	0.00787321	FALSE	TRUE
Tpm3	11788.7	0.386041	0.101355	3.80868	0.00013971	0.00799076	FALSE	TRUE
Tbcel	303.73	0.685692	0.180247	3.80145	0.000143849	0.00811875	FALSE	FALSE
Chmp1b	1571.02	0.465251	0.122396	3.80098	0.000144123	0.00811875	FALSE	TRUE
Kat2b	611.857	0.670915	0.176822	3.79219	0.000149323	0.0083402	FALSE	FALSE
Scamp3	5944.59	0.349371	0.0923378	3.78355	0.000154608	0.00854809	FALSE	TRUE
Stat1	40523.1	0.525172	0.139404	3.7667	0.000165417	0.00906489	FALSE	TRUE
Gm9889	183.001	0.700934	0.185957	3.76616	0.000165777	0.00906489	FALSE	FALSE
Samsn1	4840.62	0.456371	0.1212	3.76518	0.000166429	0.00906736	TRUE	TRUE
Amfr	473.466	0.474467	0.126123	3.76159	0.000168839	0.009132	FALSE	TRUE
Pla2g4f	740.013	0.74273	0.199782	3.71351	0.000204405	0.0104754	FALSE	FALSE
Slamf1	3428.46	0.349513	0.0946241	3.69364	0.000221066	0.0110741	TRUE	TRUE
Igflr1	5349.62	0.588422	0.159213	3.69468	0.00022016	0.0110741	FALSE	FALSE
Neu3	398.79	0.648879	0.175631	3.69221	0.000222315	0.0110994	FALSE	FALSE
Sft2d1	1533.52	0.387863	0.105212	3.68639	0.000227453	0.0112805	FALSE	FALSE
Trappc8	248.52	0.626395	0.17	3.68309	0.000230426	0.0113525	FALSE	TRUE
Gna15	242.603	0.769522	0.208718	3.68171	0.000231675	0.0113645	FALSE	FALSE
Ms4a6b	48374.8	0.435097	0.118189	3.68114	0.000232193	0.0113645	FALSE	TRUE
Btbd10	732.097	0.563703	0.153162	3.67962	0.000233582	0.0113816	FALSE	FALSE
Susd6	706.729	0.839805	0.228184	3.67909	0.000234066	0.0113816	FALSE	TRUE
Rgs14	5766.56	0.447633	0.121952	3.67029	0.000242271	0.011629	FALSE	FALSE
Gm28942	61.159	0.671486	0.18271	3.66902	0.000243486	0.0116498	FALSE	FALSE
Nrn1	540.228	0.75461	0.205534	3.66715	0.00024527	0.0116978	TRUE	FALSE
Samhd1	27946.2	0.329011	0.0903245	3.64249	0.000270016	0.0126755	TRUE	FALSE
Ets1	18158.8	0.743376	0.204115	3.63776	0.000275018	0.0127339	FALSE	TRUE
Dgka	35484.9	0.575838	0.158152	3.63999	0.000272644	0.0127339	FALSE	TRUE
Ptgir	453.617	0.7778	0.214346	3.62294	0.000291271	0.013176	FALSE	FALSE
AI467606	9923.92	0.497134	0.137272	3.62106	0.000293399	0.0132322	FALSE	FALSE
Esyt2	1085.1	0.667822	0.18446	3.61801	0.00029688	0.0133088	FALSE	TRUE
Fibcd1	19.1728	0.655467	0.19782	3.61062	0.000305464	0.0136526	FALSE	FALSE
Mdh2	14322.9	0.437237	0.121151	3.60878	0.000307646	0.0136683	FALSE	TRUE
Mmp14	51.1539	0.554116	0.181346	3.60767	0.000308964	0.0136861	FALSE	FALSE
Cytip	28912.4	0.442495	0.123252	3.58991	0.000330787	0.0144263	FALSE	TRUE
Gm26675	59.5257	0.696794	0.194227	3.58151	0.000341608	0.0147812	FALSE	FALSE
Zfand3	280.669	0.573948	0.160239	3.58002	0.000343569	0.0148231	FALSE	FALSE
Gm16069	1244.73	0.336829	0.094371	3.56914	0.000358151	0.0153194	FALSE	FALSE
Gm21987	1178.88	0.647268	0.181459	3.56479	0.000364143	0.0155312	FALSE	FALSE
Sag	144.793	0.632082	0.178541	3.53726	0.000404309	0.016812	FALSE	FALSE
Ifitm2	95.4591	0.762047	0.215195	3.53368	0.000409814	0.0169344	FALSE	FALSE
4930539E08Rik	91.4655	0.811165	0.229201	3.53314	0.000410655	0.0169344	FALSE	FALSE
Dtx1	688.94	0.469747	0.133033	3.53062	0.00041458	0.0170023	FALSE	FALSE
A030001D20Rik	67.4088	0.796363	0.225913	3.51973	0.000431986	0.0176512	FALSE	FALSE
Gm43127	268.219	0.806872	0.229186	3.51925	0.000432766	0.0176512	FALSE	FALSE
Tmem64	1219.65	0.710033	0.202097	3.50958	0.000448819	0.0182064	TRUE	TRUE
Emilin2	4.47053	0.411108	0.154409	3.50713	0.000452975	0.0182884	FALSE	FALSE
Gbp9	4566.72	0.585502	0.167676	3.49049	0.000482139	0.0190451	FALSE	TRUE
Rnf5	2468.68	0.530157	0.151799	3.49175	0.000479875	0.0190451	FALSE	FALSE
Cdkl4	28.9076	0.591908	0.190071	3.49181	0.000479755	0.0190451	FALSE	FALSE
Afap1	494.807	0.67525	0.193376	3.48879	0.000485207	0.019061	FALSE	FALSE
Spn	2135.53	0.508301	0.1457	3.48803	0.000486601	0.0190656	FALSE	TRUE
Wnt3	552.366	0.593222	0.170167	3.48455	0.000492973	0.0192646	FALSE	FALSE
Armt1	688.298	0.448359	0.12875	3.48207	0.000497555	0.0193425	FALSE	FALSE
Tapt1	303.208	0.722229	0.207857	3.47042	0.00051965	0.0198931	FALSE	TRUE
AC149222.1	95.7333	0.686859	0.1976	3.47038	0.000519714	0.0198931	FALSE	FALSE
Gm20463	1055.64	0.546823	0.157861	3.46307	0.000534056	0.0202345	FALSE	FALSE
Osbpl8	541.775	0.738282	0.212957	3.46193	0.000536326	0.0202691	FALSE	TRUE
Gramd1b	560.384	0.439538	0.127242	3.45396	0.00055242	0.0206163	FALSE	TRUE
AC153498.1	19.9185	0.77585	0.226939	3.4465	0.000567896	0.0210361	FALSE	FALSE
Ube2h	1613.52	0.586252	0.170121	3.44468	0.000571733	0.0210736	FALSE	FALSE
Sipa1l2	79.9331	0.785015	0.227426	3.4449	0.000571261	0.0210736	FALSE	FALSE
Gm28177	30644.7	0.470579	0.137134	3.43109	0.000601162	0.0219417	FALSE	FALSE
4930428O21Rik	5.65841	0.341787	0.141312	3.42769	0.000608744	0.0220566	FALSE	FALSE
Abhd12b	51.4552	0.643864	0.201745	3.42795	0.000608163	0.0220566	FALSE	FALSE
Lmo4	301.407	0.643489	0.188074	3.41903	0.000628439	0.0225513	FALSE	FALSE
Hsd3b7	69.2214	0.708938	0.20721	3.41354	0.000641237	0.0229554	FALSE	FALSE
Atad2b	182.542	0.74875	0.219177	3.41	0.000649631	0.0232002	FALSE	TRUE
Ndc80	430.142	0.615586	0.182034	3.37952	0.000726117	0.0253852	FALSE	FALSE
Chmp5	3189.11	0.444402	0.131767	3.37232	0.000745371	0.0259368	FALSE	TRUE
Pabpc1l	5.41674	0.606292	0.19011	3.36737	0.000758895	0.0262241	FALSE	FALSE
Ly6c1	8399.31	0.635264	0.188497	3.36774	0.000757863	0.0262241	FALSE	TRUE
Sesn2	263.025	0.71358	0.211719	3.36549	0.000764085	0.0262483	FALSE	FALSE
Wls	3314.32	0.740051	0.2197	3.36337	0.000769959	0.0263599	TRUE	FALSE
Pim1	144.14	0.665383	0.197693	3.36217	0.000773322	0.0263599	FALSE	TRUE
Atp1b1	849.994	0.764209	0.228842	3.3609	0.000776877	0.0264079	FALSE	TRUE
Heca	663.845	0.529172	0.157511	3.3587	0.000783107	0.0264079	FALSE	FALSE
Mbtps2	402.842	0.409609	0.122047	3.35593	0.000790992	0.0265347	FALSE	TRUE
BC049352	27.7749	0.756856	0.22741	3.35107	0.000805002	0.0268838	FALSE	FALSE
Padi3	6.63823	0.603291	0.193928	3.34663	0.000818004	0.0270758	FALSE	FALSE
Lig4	186.018	0.708261	0.211337	3.34687	0.000817302	0.0270758	FALSE	TRUE
Bcas1	189.959	0.535711	0.160149	3.34428	0.000824954	0.0272454	FALSE	FALSE
Zfp651	3.03369	0.329641	0.136235	3.34067	0.000835757	0.0275413	FALSE	FALSE
Fam117a	356.584	0.570934	0.171329	3.33093	0.000865562	0.028398	FALSE	FALSE
Atp6v1d	6698.36	0.538633	0.161862	3.32673	0.000878722	0.0287666	FALSE	TRUE
Smap2	827.58	0.620209	0.186572	3.32216	0.000893239	0.0291778	FALSE	FALSE
Gabarapl2	1951.29	0.537781	0.162022	3.31823	0.000905906	0.0293986	FALSE	FALSE
Rab3ip	1833.37	0.726239	0.220227	3.29278	0.000992033	0.0317791	FALSE	TRUE
Hopx	5912.41	0.539897	0.164533	3.28032	0.00103688	0.0328633	FALSE	TRUE
Epb41l4a	57.6827	0.709829	0.221205	3.26515	0.00109407	0.0343116	FALSE	FALSE
Gm32569	57.1911	0.749761	0.22928	3.26392	0.00109882	0.0343164	FALSE	FALSE
Ttc5	3110.35	0.289409	0.0886558	3.26438	0.00109705	0.0343164	FALSE	FALSE
Gpr83	15694.3	0.592064	0.181886	3.25328	0.00114082	0.0351136	TRUE	FALSE
Fam49a	1559.19	0.57261	0.17634	3.24565	0.00117182	0.0357727	FALSE	FALSE
Rab6a	273.252	0.684526	0.21081	3.24312	0.00118228	0.0360186	FALSE	TRUE
Mamstr	28.8795	0.746627	0.230112	3.24033	0.0011939	0.0362246	FALSE	FALSE
Fam204a	529.021	0.54937	0.169467	3.24038	0.00119372	0.0362246	FALSE	FALSE
Gale	606.561	0.506665	0.156469	3.23719	0.00120712	0.0365515	FALSE	FALSE
Pdcd1	1755.34	0.476659	0.1473	3.23542	0.00121463	0.0367045	FALSE	FALSE
Peli1	1381.22	0.727756	0.224754	3.23331	0.00122363	0.0368273	FALSE	TRUE
Fam240a	30.1016	0.541758	0.186879	3.23215	0.00122864	0.0369038	FALSE	FALSE
Tspyl4	214.666	0.5259	0.162848	3.22763	0.00124822	0.0371787	FALSE	FALSE
Got1	1452.52	0.414275	0.128319	3.22828	0.00124537	0.0371787	FALSE	TRUE
Hist3h2ba	86.2272	0.698655	0.216429	3.22095	0.00127768	0.0377027	FALSE	FALSE
Cdipt	12066.4	0.365816	0.114043	3.20757	0.00133864	0.0391215	FALSE	FALSE
Pmaip1	215.414	0.695201	0.21659	3.20557	0.00134796	0.0393014	TRUE	FALSE
Kcnmb4	71.4985	0.731613	0.228186	3.20397	0.00135546	0.0394432	FALSE	FALSE
Naif1	293.986	0.408303	0.127661	3.19809	0.0013834	0.0398677	FALSE	FALSE
Sh3rf1	82.9062	0.650313	0.203174	3.19693	0.00138897	0.0399129	TRUE	TRUE
Itgb2	26027.8	0.505305	0.158033	3.19665	0.00139032	0.0399129	FALSE	TRUE
Irak2	1793.54	0.558588	0.174745	3.19513	0.00139769	0.0400475	FALSE	FALSE
Trpv4	28.2805	0.679275	0.217624	3.19075	0.00141906	0.0404269	FALSE	FALSE
Baiap2	504.111	0.517618	0.162282	3.18847	0.00143027	0.0405912	FALSE	FALSE
Ptprf	47.9412	0.731609	0.22939	3.18117	0.00146682	0.0412367	FALSE	FALSE
Edem1	1131.74	0.547278	0.172102	3.17867	0.00147952	0.0414112	FALSE	TRUE
Crybg1	3735.01	0.581581	0.182877	3.17831	0.00148135	0.0414112	FALSE	TRUE
Gm37584	2.80066	0.352862	0.144624	3.16392	0.0015566	0.0432718	FALSE	FALSE
Slc43a1	144.572	0.635924	0.200959	3.15976	0.00157897	0.0436498	FALSE	FALSE
Cycs	935.294	0.547299	0.173083	3.16079	0.00157342	0.0436498	FALSE	FALSE
Insig2	1140.47	0.342707	0.108505	3.15834	0.00158672	0.043783	FALSE	FALSE
Filip1	4.15376	0.329772	0.141711	3.14867	0.00164015	0.0444686	FALSE	FALSE
Wipf2	175.769	0.527359	0.167401	3.14935	0.00163633	0.0444686	FALSE	TRUE
Cdk19	853.643	0.594173	0.188819	3.14466	0.00166279	0.0448863	FALSE	TRUE
Mzt1	1005.69	0.353562	0.112529	3.14189	0.00167858	0.0451493	FALSE	FALSE
Gm45717	55.6183	0.69727	0.221628	3.13823	0.00169972	0.045389	FALSE	FALSE
Nsd3	1086.16	0.608852	0.193883	3.13772	0.0017027	0.045389	FALSE	FALSE
Fry	120.08	0.692521	0.220343	3.13668	0.00170872	0.0454684	FALSE	FALSE
Zfp212	526.128	0.336849	0.107911	3.12143	0.00179972	0.0470854	FALSE	FALSE
Gm21983	2765.28	0.32092	0.102833	3.12071	0.00180418	0.0470854	FALSE	FALSE
Gsk3a	132.023	0.673048	0.215376	3.1193	0.00181281	0.0472279	FALSE	FALSE
Itgb3	1067.65	0.665215	0.213419	3.11251	0.00185505	0.0481603	FALSE	FALSE
Rab4b	2939.52	0.319198	0.102686	3.1084	0.001881	0.0485113	FALSE	FALSE
Tpm3-rs7	1381.13	0.434903	0.139899	3.10832	0.00188157	0.0485113	FALSE	FALSE
Crim1	107.523	0.647235	0.208156	3.10502	0.00190269	0.0488671	FALSE	FALSE
Hopxos	1695.26	0.503687	0.162337	3.10185	0.00192317	0.0492437	FALSE	FALSE
Gid8	668.129	0.473196	0.152571	3.10098	0.00192883	0.0493041	FALSE	FALSE
Sla	8045.6	0.427731	0.138135	3.09613	0.00196067	0.0499258	TRUE	TRUE

## Sheet: Table S2 DE_genes_decreased
Gene	Mean normalised read count	Log2 fold change	lfcSE	Wald statistic	p value	FDR-adjusted p value	Treg signature	CLIP target
Gm26637	91.1291	-3.27112	0.203363	-14.6163	2.21116e-48	3.30082e-44	FALSE	FALSE
Gm26510	267.612	-2.59597	0.194028	-13.3502	1.18094e-40	8.81453e-37	FALSE	FALSE
Tcrg-C1	209.429	-2.06185	0.188671	-10.9134	9.94358e-28	4.94793e-24	FALSE	FALSE
Lta4h	10415.2	-0.897561	0.0867205	-10.3502	4.17716e-25	1.03928e-21	FALSE	FALSE
Ttc27	717.184	-1.27519	0.139855	-9.11659	7.75227e-20	1.44657e-16	FALSE	FALSE
Apobec2	48.44	-1.86889	0.228826	-8.31574	9.11845e-17	1.3612e-13	FALSE	FALSE
Abhd14a	214.164	-1.17452	0.147379	-7.95901	1.73427e-15	2.35357e-12	FALSE	FALSE
Bid	977.108	-0.864428	0.110886	-7.79459	6.46177e-15	8.03844e-12	TRUE	FALSE
Akr1e1	239.358	-1.27208	0.174362	-7.29366	3.01653e-13	3.00205e-10	FALSE	FALSE
Apol9b	765.312	-1.16959	0.163381	-7.16306	7.88935e-13	6.92778e-10	FALSE	FALSE
Eif2ak2	296.654	-1.2018	0.168703	-7.12419	1.04698e-12	8.68297e-10	FALSE	FALSE
Thy1	694.32	-1.20771	0.171726	-7.03853	1.94276e-12	1.45008e-09	FALSE	TRUE
1810006J02Rik	182.683	-0.902335	0.129909	-6.9377	3.98529e-12	2.83297e-09	FALSE	FALSE
Dctd	124.297	-1.32471	0.191071	-6.92699	4.29885e-12	2.91697e-09	FALSE	FALSE
Capg	9977.75	-1.13769	0.167059	-6.81771	9.25036e-12	5.75372e-09	TRUE	FALSE
Nit2	640.093	-0.745154	0.109967	-6.77517	1.24258e-11	7.1343e-09	FALSE	FALSE
Fam213a	190.927	-1.17651	0.178707	-6.58123	4.6657e-11	2.40171e-08	FALSE	FALSE
Gss	315.254	-1.04001	0.161076	-6.45687	1.06889e-10	5.20828e-08	FALSE	FALSE
Specc1	229.426	-1.16194	0.180153	-6.45069	1.11344e-10	5.20828e-08	TRUE	FALSE
Chchd6	97.7858	-1.16849	0.181787	-6.41418	1.41585e-10	6.40481e-08	FALSE	FALSE
Reck	161.656	-1.26508	0.198256	-6.39102	1.64785e-10	7.02829e-08	FALSE	FALSE
Idua	816.307	-1.22733	0.192563	-6.39119	1.64601e-10	7.02829e-08	FALSE	FALSE
Coq4	158.806	-0.999042	0.157669	-6.32839	2.47736e-10	9.99513e-08	FALSE	FALSE
5830416I19Rik	73.5148	-0.847095	0.201045	-6.31843	2.64242e-10	1.03748e-07	FALSE	FALSE
Ctsw	4662.86	-1.0878	0.172489	-6.3145	2.71045e-10	1.03748e-07	FALSE	FALSE
Fbxo22	1238.65	-0.789377	0.12519	-6.30548	2.87302e-10	1.07221e-07	FALSE	FALSE
Trgj1	17.2609	-1.44458	0.230315	-6.19908	5.6795e-10	1.9269e-07	FALSE	FALSE
Gm45641	43.3927	-1.37562	0.224512	-6.1534	7.58409e-10	2.4612e-07	FALSE	FALSE
Snapc2	556.166	-0.680281	0.110658	-6.14645	7.92387e-10	2.51675e-07	FALSE	FALSE
Ncmap	448.585	-1.18986	0.195916	-6.0905	1.12562e-09	3.42923e-07	FALSE	FALSE
Marveld2	69.2524	-1.12354	0.221375	-6.04008	1.54037e-09	4.59894e-07	FALSE	FALSE
Top1mt	221.514	-1.05835	0.176154	-6.00746	1.88454e-09	5.51617e-07	FALSE	FALSE
Zfp36l1	1481.63	-1.09374	0.18377	-5.96262	2.48232e-09	7.12615e-07	FALSE	TRUE
Gm43305	38.5741	-0.705398	0.189391	-5.9368	2.90644e-09	8.03468e-07	FALSE	FALSE
Alg8	469.046	-0.921665	0.156877	-5.87514	4.22499e-09	1.08742e-06	FALSE	FALSE
Coq9	960.745	-0.680116	0.119546	-5.689	1.27789e-08	3.17939e-06	FALSE	FALSE
Dhrs11	256.859	-1.02592	0.180848	-5.67495	1.38732e-08	3.39508e-06	FALSE	FALSE
Tcrg-C4	181.065	-1.21701	0.218773	-5.61392	1.97796e-08	4.76242e-06	FALSE	FALSE
Gcsh	465.679	-0.790765	0.14172	-5.57941	2.41339e-08	5.62923e-06	FALSE	FALSE
Mettl2	634.387	-0.677201	0.125626	-5.39019	7.03849e-08	1.54515e-05	FALSE	FALSE
Nudt7	361.722	-0.724083	0.136286	-5.31217	1.08327e-07	2.2776e-05	FALSE	FALSE
Tesk1	308.273	-0.629912	0.118735	-5.30326	1.13752e-07	2.35846e-05	FALSE	FALSE
Suclg2	890.214	-0.640677	0.122065	-5.24844	1.53392e-07	3.01294e-05	FALSE	FALSE
Fuca2	560.204	-0.940702	0.181288	-5.19411	2.05703e-07	3.93683e-05	FALSE	FALSE
Gpr171	1485.79	-0.562626	0.108667	-5.17743	2.24964e-07	4.19782e-05	FALSE	TRUE
Tmem220	13.1843	-0.836863	0.200273	-5.14667	2.65152e-07	4.6567e-05	FALSE	FALSE
Cd72	1460.31	-0.642201	0.1261	-5.09304	3.52376e-07	5.91042e-05	FALSE	FALSE
Bphl	746.865	-0.606437	0.119511	-5.07398	3.89588e-07	6.39095e-05	FALSE	FALSE
Gabarapl1	188.072	-0.974523	0.193417	-5.04344	4.57238e-07	7.12123e-05	TRUE	FALSE
Gm28727	53.0503	-1.01516	0.200653	-5.04314	4.57957e-07	7.12123e-05	FALSE	FALSE
H2-Oa	293.038	-1.09065	0.219923	-5.00547	5.57266e-07	8.57614e-05	FALSE	FALSE
Apol7e	484.983	-0.668679	0.134065	-4.98704	6.13116e-07	9.33939e-05	FALSE	FALSE
Drc1	342.223	-1.08992	0.221991	-4.96566	6.84677e-07	0.000102913	FALSE	FALSE
Hist1h4m	4.47315	-0.763178	0.194277	-4.96433	6.89394e-07	0.000102913	FALSE	FALSE
Bend6	69.4528	-1.10097	0.225389	-4.94279	7.70138e-07	0.000113828	FALSE	FALSE
Afp	188.155	-1.05028	0.214446	-4.9228	8.53125e-07	0.000122819	FALSE	FALSE
Pafah1b3	263.813	-0.735323	0.149351	-4.92223	8.55649e-07	0.000122819	TRUE	FALSE
Abhd14b	169.986	-1.02974	0.210838	-4.90184	9.49435e-07	0.000133709	FALSE	FALSE
Scarb1	292.146	-0.892403	0.182936	-4.88186	1.05092e-06	0.000142619	FALSE	FALSE
Capn3	1628.8	-0.791666	0.162352	-4.87874	1.06765e-06	0.000143585	TRUE	FALSE
Dtx4	89.8539	-1.04043	0.216022	-4.8345	1.33482e-06	0.000173272	FALSE	FALSE
Ggh	604.354	-0.663947	0.138261	-4.80225	1.56893e-06	0.000194467	FALSE	FALSE
Grwd1	1063.97	-0.555793	0.115749	-4.8017	1.5732e-06	0.000194467	FALSE	FALSE
Siae	1376.68	-0.473578	0.0988297	-4.79174	1.65345e-06	0.000202317	FALSE	FALSE
Dguok	2004.83	-0.647552	0.135734	-4.77138	1.8297e-06	0.000222063	FALSE	FALSE
Aqp3	191.244	-0.950638	0.199779	-4.76678	1.87194e-06	0.000225358	FALSE	FALSE
Gm26517	235	-0.716054	0.150319	-4.7623	1.914e-06	0.000228578	FALSE	FALSE
Slc25a4	2676.12	-0.660748	0.139919	-4.72321	2.32151e-06	0.000270746	FALSE	TRUE
Fggy	95.5572	-1.04322	0.224652	-4.69381	2.68158e-06	0.000310315	FALSE	FALSE
Avpr1a	12.495	-0.857195	0.210278	-4.69072	2.72251e-06	0.000312523	FALSE	FALSE
Mocs1	295.275	-1.04928	0.229044	-4.68922	2.74253e-06	0.000312523	FALSE	FALSE
Apol9a	144.828	-0.921812	0.197067	-4.68491	2.80082e-06	0.000316747	FALSE	FALSE
Gphn	173.152	-0.759291	0.162238	-4.67788	2.89859e-06	0.000325339	TRUE	FALSE
Wrb	324.081	-0.587996	0.126848	-4.63457	3.57673e-06	0.000395507	FALSE	FALSE
Gm32633	126.627	-1.01826	0.223354	-4.60737	4.07791e-06	0.000444343	FALSE	FALSE
Prmt5	1960.62	-0.405068	0.0880029	-4.60279	4.16874e-06	0.000450949	FALSE	TRUE
Tcrg-C2	124.613	-1.01713	0.223308	-4.60096	4.20555e-06	0.000451658	FALSE	FALSE
Bnip3	160.738	-0.725814	0.157693	-4.59943	4.23657e-06	0.00045174	FALSE	FALSE
Rrp15	731.126	-0.714433	0.155552	-4.59392	4.35003e-06	0.000460548	FALSE	FALSE
Fam210a	461.369	-0.534069	0.1171	-4.56017	5.11123e-06	0.000533569	FALSE	FALSE
Memo1	823.806	-0.646578	0.142634	-4.53378	5.79379e-06	0.000600623	FALSE	FALSE
Fastkd2	684.712	-0.777624	0.172138	-4.52004	6.18287e-06	0.000632177	FALSE	FALSE
Mfge8	393.799	-0.816741	0.181114	-4.51288	6.39525e-06	0.000649444	FALSE	FALSE
Tbc1d16	17.7117	-0.988784	0.228077	-4.4935	7.00604e-06	0.000697241	FALSE	FALSE
Gm33051	242.5	-0.853766	0.191757	-4.45727	8.30084e-06	0.00081523	FALSE	FALSE
Mecr	377.157	-0.774218	0.17407	-4.4494	8.61093e-06	0.000834701	FALSE	FALSE
Nrg4	246.777	-0.730367	0.164522	-4.43856	9.05615e-06	0.000872195	FALSE	FALSE
Slc39a11	1039.08	-0.672234	0.151861	-4.42756	9.53035e-06	0.000906173	FALSE	FALSE
Pinx1	259.667	-0.817709	0.185344	-4.41381	1.01568e-05	0.000959621	FALSE	FALSE
Gm28959	62.0439	-0.948129	0.21611	-4.39375	1.11411e-05	0.00102663	FALSE	FALSE
Dph1	830.102	-0.546682	0.124677	-4.3847	1.16148e-05	0.00105723	FALSE	FALSE
Fbl	1170.46	-0.578153	0.132772	-4.35473	1.33231e-05	0.00119812	FALSE	FALSE
Cdca7l	927.366	-0.634898	0.145865	-4.35297	1.34306e-05	0.00120055	FALSE	FALSE
Sc5d	1874.71	-0.644053	0.148395	-4.34119	1.41716e-05	0.00125854	FALSE	FALSE
Jaml	595.921	-0.865823	0.200065	-4.33871	1.43322e-05	0.00125854	FALSE	FALSE
Ldlrad4	659.796	-0.724122	0.166954	-4.3393	1.42935e-05	0.00125854	TRUE	FALSE
Rpl22l1	738.971	-0.785199	0.183857	-4.27536	1.90826e-05	0.0016094	FALSE	FALSE
Ahnak	396.359	-0.926166	0.218281	-4.2725	1.93297e-05	0.00162108	TRUE	TRUE
Hibch	567.289	-0.6693	0.156788	-4.26946	1.95946e-05	0.00163412	FALSE	FALSE
Mpv17	907.821	-0.508953	0.119871	-4.24584	2.17779e-05	0.00178627	FALSE	FALSE
Oasl1	540.044	-0.662914	0.156136	-4.24617	2.17454e-05	0.00178627	FALSE	FALSE
Crmp1	250.519	-0.903732	0.216504	-4.19619	2.71446e-05	0.00214654	FALSE	FALSE
Adgrg1	117.243	-0.929204	0.230158	-4.18113	2.90064e-05	0.00226705	FALSE	FALSE
Ddx56	2052.12	-0.402867	0.0965523	-4.17247	3.0131e-05	0.00233055	FALSE	FALSE
Dhodh	1160.15	-0.464357	0.111768	-4.15456	3.25921e-05	0.00246972	FALSE	FALSE
Lap3	819.413	-0.627698	0.151225	-4.15147	3.30351e-05	0.00247813	FALSE	FALSE
Cd86	1227.37	-0.783005	0.189269	-4.14331	3.42328e-05	0.00255514	TRUE	FALSE
Aatf	1600.73	-0.542027	0.132218	-4.09995	4.13242e-05	0.00300921	FALSE	FALSE
Rcl1	1249.89	-0.74879	0.182832	-4.10014	4.12902e-05	0.00300921	FALSE	FALSE
Rragb	161.301	-0.80587	0.196932	-4.0963	4.19799e-05	0.00302742	FALSE	FALSE
Oasl2	720.476	-0.595491	0.146241	-4.07244	4.65238e-05	0.00333898	FALSE	FALSE
Akr1b10	504.38	-0.685634	0.169106	-4.05599	4.99223e-05	0.00353194	FALSE	FALSE
Zfp932	190.04	-0.638793	0.157998	-4.04173	5.30591e-05	0.00370124	FALSE	FALSE
Dkc1	3900.27	-0.462958	0.114624	-4.03913	5.36495e-05	0.00372502	FALSE	FALSE
Riox2	2370.26	-0.367926	0.0913768	-4.02645	5.66264e-05	0.00389548	FALSE	FALSE
Gcat	266.026	-0.7718	0.192154	-4.02135	5.7866e-05	0.0039625	FALSE	FALSE
Thnsl2	109.471	-0.878136	0.220022	-4.01449	5.95746e-05	0.00404241	FALSE	FALSE
Tmem29	208.551	-0.659872	0.164408	-4.01277	6.0011e-05	0.00405359	FALSE	FALSE
Snx20	312.865	-0.807206	0.201878	-4.00757	6.13463e-05	0.00412513	FALSE	FALSE
Gusb	1432.37	-0.493515	0.123287	-4.0031	6.25166e-05	0.00415418	FALSE	FALSE
Anxa7	1420.42	-0.494286	0.123489	-4.00274	6.26132e-05	0.00415418	FALSE	FALSE
Nup37	481.86	-0.533626	0.133907	-3.98486	6.75191e-05	0.00445985	FALSE	FALSE
Eef2kmt	831.286	-0.552629	0.139034	-3.9751	7.03505e-05	0.00456605	FALSE	FALSE
Mettl26	806.376	-0.58543	0.147255	-3.97606	7.00666e-05	0.00456605	FALSE	FALSE
Ywhaq	2786.72	-0.358425	0.0902077	-3.97336	7.0867e-05	0.00457967	FALSE	FALSE
Gtf2h3	1188.5	-0.539037	0.136424	-3.95137	7.7705e-05	0.00497846	FALSE	FALSE
Cby1	238.103	-0.61696	0.156186	-3.94912	7.84382e-05	0.00500395	FALSE	FALSE
Zc4h2	230.97	-0.710372	0.180416	-3.9393	8.1721e-05	0.0051912	FALSE	FALSE
Gm10684	95.7899	-0.836532	0.213091	-3.93694	8.25285e-05	0.00522028	FALSE	FALSE
Wdr75	1435.54	-0.391172	0.0996049	-3.92711	8.59722e-05	0.00541516	FALSE	TRUE
Epsti1	2429.18	-0.481445	0.122707	-3.92375	8.71816e-05	0.00546826	FALSE	FALSE
Gtf2h4	557.93	-0.602021	0.153642	-3.91869	8.90328e-05	0.00556101	FALSE	FALSE
Ift74	56.8929	-0.864422	0.229363	-3.90592	9.38662e-05	0.00583848	FALSE	FALSE
Ftsj1	646.05	-0.424789	0.109331	-3.88524	0.000102228	0.00633218	FALSE	FALSE
Ikbip	71.4256	-0.856622	0.222074	-3.88064	0.000104184	0.00642668	FALSE	FALSE
Akr1c13	549.723	-0.599282	0.154508	-3.8793	0.000104756	0.00643537	FALSE	FALSE
Hadh	1792.26	-0.508158	0.131121	-3.8758	0.000106274	0.00648685	FALSE	FALSE
Bag2	22.4141	-0.73799	0.212888	-3.86891	0.000109325	0.00658067	FALSE	FALSE
Erlin1	152.731	-0.855543	0.223704	-3.85675	0.000114906	0.0068888	FALSE	FALSE
Pcca	632.717	-0.609555	0.158131	-3.85549	0.000115499	0.00689665	FALSE	FALSE
Syngr2	2184.26	-0.626371	0.16259	-3.85415	0.00011613	0.00690676	FALSE	FALSE
Ncf4	2468.83	-0.625467	0.162477	-3.85125	0.000117517	0.0069615	FALSE	FALSE
Lpxn	3257.91	-0.618734	0.16134	-3.8366	0.000124749	0.00730293	TRUE	FALSE
1700101I11Rik	31.1239	-0.852842	0.222569	-3.8337	0.000126233	0.00736093	FALSE	FALSE
Polr1e	819.892	-0.531274	0.138735	-3.82968	0.000128312	0.00745309	FALSE	FALSE
Gatb	341.746	-0.666064	0.175062	-3.80576	0.000141372	0.00805497	FALSE	FALSE
Slc27a1	202.836	-0.836981	0.221729	-3.80101	0.000144106	0.00811875	FALSE	FALSE
Ifit3	823.723	-0.660976	0.174155	-3.79757	0.000146122	0.00820042	FALSE	FALSE
Prf1	255.692	-0.826325	0.219229	-3.79152	0.00014973	0.0083402	FALSE	FALSE
Cyp4v3	308.047	-0.748111	0.197759	-3.7884	0.00015162	0.00841408	FALSE	FALSE
Ccr6	280.493	-0.823893	0.219844	-3.77177	0.000162093	0.0089289	TRUE	FALSE
Prmt7	1454.98	-0.44638	0.118607	-3.76353	0.000167529	0.00909409	FALSE	FALSE
Gemin6	298.209	-0.660521	0.175963	-3.75515	0.00017324	0.00933619	FALSE	FALSE
Slc19a1	1298.29	-0.564083	0.150418	-3.75077	0.000176289	0.00946635	FALSE	FALSE
Acer2	220.653	-0.7101	0.189786	-3.74396	0.000181142	0.00967103	FALSE	FALSE
Mccc2	225.976	-0.800709	0.214791	-3.74361	0.000181397	0.00967103	FALSE	FALSE
Eef2k	217.663	-0.772969	0.207213	-3.74064	0.000183552	0.0097511	TRUE	FALSE
Gnb5	136.477	-0.675481	0.180769	-3.73538	0.000187432	0.00989482	FALSE	FALSE
2310015A10Rik	82.5022	-0.801485	0.214969	-3.73518	0.000187583	0.00989482	FALSE	FALSE
Ppie	1637.44	-0.478721	0.128216	-3.73388	0.000188549	0.00991077	FALSE	FALSE
Chd9	565.684	-0.760927	0.204473	-3.73092	0.00019078	0.00999285	FALSE	FALSE
Acat1	3123.32	-0.397418	0.106559	-3.72961	0.000191774	0.0100098	FALSE	FALSE
Sqor	565.356	-0.730115	0.196363	-3.72466	0.000195576	0.0101727	FALSE	FALSE
Rchy1	2038.34	-0.368492	0.0990776	-3.71927	0.000199798	0.0103562	FALSE	FALSE
Klf4	6.11352	-0.281605	0.135373	-3.71289	0.000204905	0.0104754	FALSE	FALSE
Alad	677.684	-0.500788	0.13486	-3.71333	0.000204547	0.0104754	FALSE	FALSE
Trmt5	428.012	-0.567024	0.152653	-3.7144	0.000203689	0.0104754	FALSE	FALSE
Gm26518	231.597	-0.503734	0.135817	-3.70796	0.000208934	0.0106449	FALSE	FALSE
Bccip	2781.37	-0.472922	0.127904	-3.69774	0.000217523	0.0110449	FALSE	TRUE
Nmnat1	231.887	-0.576453	0.156018	-3.69438	0.000220427	0.0110741	FALSE	FALSE
Tmem138	268.871	-0.497219	0.13453	-3.69529	0.00021964	0.0110741	FALSE	FALSE
2900041M22Rik	21.4544	-0.760857	0.219758	-3.68723	0.000226706	0.0112805	FALSE	FALSE
Rpp38	469.027	-0.642612	0.174532	-3.68382	0.000229764	0.0113525	FALSE	FALSE
Dars	5400.47	-0.380366	0.10356	-3.673	0.000239724	0.0116117	FALSE	FALSE
Abcg2	510.565	-0.669101	0.18235	-3.67184	0.000240813	0.0116117	FALSE	FALSE
Vkorc1	422.349	-0.705763	0.192482	-3.6715	0.000241133	0.0116117	FALSE	FALSE
Trim10	12.212	-0.224031	0.123598	-3.66616	0.000246223	0.0117058	FALSE	FALSE
Ifit3b	179.464	-0.745057	0.204049	-3.65672	0.00025546	0.0121064	FALSE	FALSE
Trap1	2711.44	-0.440025	0.120549	-3.65033	0.000261907	0.0123726	FALSE	FALSE
Timm8a1	95.8311	-0.643921	0.176616	-3.64295	0.000269529	0.0126755	FALSE	FALSE
Gm26779	4.77052	-0.751278	0.210647	-3.63884	0.000273864	0.0127339	FALSE	FALSE
Umps	1810.54	-0.410192	0.112721	-3.63911	0.000273579	0.0127339	FALSE	FALSE
Tceal9	688.766	-0.593622	0.163254	-3.63729	0.000275525	0.0127339	FALSE	FALSE
Myo3b	137.053	-0.817948	0.2277	-3.63541	0.00027754	0.0127874	FALSE	FALSE
Trim30c	16.6101	-0.614429	0.198277	-3.63314	0.000279996	0.0128608	FALSE	FALSE
Gaa	773.88	-0.748371	0.206822	-3.62892	0.000284606	0.0130325	FALSE	FALSE
Pus3	1293.65	-0.414897	0.114413	-3.62634	0.000287469	0.0131233	FALSE	FALSE
Metap1d	382.522	-0.738857	0.204312	-3.62451	0.000289505	0.013136	FALSE	FALSE
Crybg3	883.557	-0.352946	0.097359	-3.62502	0.000288944	0.013136	FALSE	FALSE
Tmsb15l	347.647	-0.591225	0.163377	-3.61891	0.000295845	0.0133023	FALSE	FALSE
Gm14085	992.827	-0.764708	0.212722	-3.60945	0.000306848	0.0136683	FALSE	FALSE
Senp8	132.439	-0.715038	0.198662	-3.60318	0.000314342	0.0138831	FALSE	FALSE
Eed	957.233	-0.419268	0.116414	-3.60143	0.000316477	0.0139362	FALSE	FALSE
Dtd1	1238.98	-0.558652	0.155213	-3.60017	0.000318009	0.0139625	FALSE	FALSE
Hddc2	800.082	-0.55853	0.15524	-3.59854	0.000320012	0.0140092	FALSE	FALSE
Tbc1d19	92.9713	-0.796409	0.223384	-3.58937	0.000331473	0.0144263	FALSE	FALSE
Trbv12-1	1277.35	-0.464621	0.129565	-3.58619	0.00033554	0.0145609	FALSE	FALSE
Bex3	1223.85	-0.496459	0.138799	-3.57714	0.000347368	0.0149438	FALSE	FALSE
Snrpn	8.32357	-0.380583	0.156177	-3.57448	0.000350926	0.0150535	FALSE	FALSE
Sdc4	218.947	-0.759703	0.213979	-3.56323	0.000366313	0.0155792	TRUE	FALSE
Apex1	1932.42	-0.550634	0.154774	-3.55865	0.000372765	0.0158086	FALSE	FALSE
Rpl5	3087.88	-0.565747	0.15913	-3.55651	0.000375811	0.0158749	FALSE	FALSE
Mettl1	337.04	-0.66455	0.187022	-3.55606	0.000376455	0.0158749	FALSE	FALSE
Gm21974	267.852	-0.693675	0.195699	-3.54934	0.000386201	0.01624	FALSE	FALSE
Hyls1	1443.2	-0.400236	0.112804	-3.54811	0.000388011	0.0162703	FALSE	FALSE
1190007I07Rik	228.256	-0.486149	0.137085	-3.54512	0.000392439	0.0164099	FALSE	FALSE
Chchd7	463.104	-0.692814	0.196119	-3.53798	0.000403199	0.016812	FALSE	FALSE
Thop1	187.521	-0.70839	0.200724	-3.53454	0.000408484	0.0169344	FALSE	FALSE
Atxn10	3867.88	-0.426411	0.120767	-3.53107	0.00041389	0.0170023	FALSE	FALSE
Ttn	92.9097	-0.715231	0.219553	-3.51674	0.000436879	0.0177704	FALSE	FALSE
Ccdc28a	693.36	-0.46785	0.133406	-3.50694	0.000453289	0.0182884	FALSE	FALSE
1700016L21Rik	3.38085	-0.3445	0.147046	-3.5032	0.00045971	0.0184477	FALSE	FALSE
Rars2	1186.9	-0.470353	0.134248	-3.50377	0.000458715	0.0184477	FALSE	FALSE
Bcs1l	367.609	-0.5542	0.158668	-3.4927	0.000478172	0.0190451	FALSE	FALSE
Mrpl34	766.269	-0.472079	0.135136	-3.49353	0.000476685	0.0190451	FALSE	FALSE
Vrk2	909.723	-0.512265	0.146806	-3.48972	0.000483528	0.0190451	FALSE	FALSE
Cd79b	530.904	-0.650723	0.186634	-3.48981	0.000483357	0.0190451	FALSE	FALSE
Tcrg-V6	4.27548	-0.699318	0.207066	-3.48284	0.000496129	0.0193374	FALSE	FALSE
Dtymk	1380.37	-0.519687	0.149419	-3.47858	0.000504086	0.0195454	FALSE	FALSE
Hspa9	3912.14	-0.457255	0.131508	-3.47737	0.000506365	0.0195829	FALSE	TRUE
Tpi1	1325.16	-0.558294	0.160676	-3.47579	0.000509347	0.0196474	FALSE	FALSE
Tmsb15b1	203.498	-0.538645	0.155045	-3.47302	0.000514635	0.0198002	FALSE	FALSE
3110009E18Rik	165.722	-0.539005	0.155366	-3.46811	0.000524128	0.0200107	FALSE	FALSE
Bckdk	1410.62	-0.502815	0.145154	-3.46447	0.000531276	0.0202319	FALSE	FALSE
Trub1	495.676	-0.585109	0.169011	-3.46308	0.000534027	0.0202345	FALSE	FALSE
Ifit1	3225.95	-0.515756	0.149061	-3.46078	0.000538608	0.0203039	FALSE	FALSE
Cct3	9965.46	-0.38436	0.111161	-3.45781	0.000544576	0.0203745	FALSE	FALSE
Man1c1	12.2345	-0.701255	0.216488	-3.45898	0.000542217	0.0203745	FALSE	FALSE
Ndufaf7	758.611	-0.534244	0.154505	-3.45841	0.000543369	0.0203745	FALSE	FALSE
AC159649.3	337.121	-0.648966	0.188153	-3.45187	0.00055672	0.020725	FALSE	FALSE
2210408I21Rik	20.4282	-0.768473	0.228316	-3.45078	0.000558966	0.0207568	FALSE	FALSE
Gnl3	1709.98	-0.609007	0.177215	-3.43897	0.000583937	0.0214705	FALSE	FALSE
Cd320	222.829	-0.76267	0.223516	-3.43743	0.000587261	0.0215397	FALSE	FALSE
Rars	2335	-0.427206	0.124354	-3.43561	0.00059123	0.0216321	FALSE	FALSE
Immp2l	199.656	-0.657861	0.192003	-3.42965	0.00060436	0.0220046	FALSE	FALSE
Supt3	319.617	-0.639404	0.186774	-3.42568	0.000613272	0.0221669	FALSE	FALSE
Art4	207.416	-0.684978	0.200247	-3.42483	0.000615173	0.0221819	FALSE	FALSE
Gpr34	1302.76	-0.619842	0.181391	-3.42015	0.000625875	0.0225134	TRUE	FALSE
Itgb3bp	472.052	-0.541586	0.159163	-3.40319	0.000666038	0.0236167	FALSE	FALSE
Tmem126a	697.643	-0.569509	0.16739	-3.40356	0.000665137	0.0236167	FALSE	FALSE
Pgam1	197.494	-0.509962	0.14979	-3.4036	0.000665044	0.0236167	FALSE	FALSE
Fhit	60.7176	-0.735606	0.216883	-3.40184	0.000669347	0.0236778	FALSE	FALSE
Ppic	66.9167	-0.766996	0.230333	-3.39378	0.000689345	0.0243275	FALSE	FALSE
Daglb	498.885	-0.462125	0.136498	-3.38547	0.00071057	0.0250174	FALSE	FALSE
Vps45	773.867	-0.483235	0.142806	-3.38406	0.000714216	0.0250866	FALSE	FALSE
Fdx1l	324.446	-0.711322	0.211138	-3.37996	0.000724969	0.0253852	FALSE	TRUE
Phgdh	1912.25	-0.448788	0.133023	-3.374	0.000740849	0.0258397	FALSE	FALSE
Sardh	150.74	-0.736124	0.219417	-3.37065	0.00074992	0.0260344	FALSE	FALSE
AC163637.2	270.621	-0.707321	0.21082	-3.36557	0.000763847	0.0262483	FALSE	FALSE
Oplah	330.496	-0.604164	0.179608	-3.3652	0.000764873	0.0262483	FALSE	FALSE
Rpp40	207.184	-0.740528	0.221559	-3.36214	0.000773422	0.0263599	FALSE	FALSE
Il18r1	189.127	-0.70405	0.210211	-3.35792	0.000785301	0.0264079	FALSE	FALSE
Mrps2	883.072	-0.44795	0.133375	-3.35878	0.000782886	0.0264079	FALSE	FALSE
Socs2	1294.54	-0.607724	0.181131	-3.35787	0.000785444	0.0264079	TRUE	FALSE
Pdcd1lg2	160.944	-0.589113	0.17537	-3.35917	0.000781774	0.0264079	TRUE	FALSE
Yif1b	1121.69	-0.478264	0.142649	-3.35311	0.000799102	0.0267466	FALSE	FALSE
Cdca7	712.336	-0.61931	0.18514	-3.34778	0.000814624	0.0270758	FALSE	FALSE
Zfp422	731.243	-0.378525	0.11308	-3.34742	0.000815688	0.0270758	FALSE	FALSE
Gpr55	23.5645	-0.672131	0.216328	-3.33334	0.000858115	0.0282157	FALSE	FALSE
AI854703	115.694	-0.68585	0.206781	-3.32123	0.000896214	0.0292111	FALSE	FALSE
Gem	198.262	-0.688445	0.207787	-3.32051	0.000898538	0.029223	TRUE	TRUE
Hsd17b12	1085.98	-0.501429	0.151246	-3.3159	0.000913493	0.0295805	FALSE	FALSE
Rogdi	280.462	-0.524826	0.158366	-3.31367	0.000920811	0.029753	FALSE	FALSE
Pomt2	87.8544	-0.678399	0.219505	-3.3118	0.00092699	0.0298879	FALSE	FALSE
Adi1	1730.59	-0.552137	0.166823	-3.31119	0.000929012	0.0298885	FALSE	FALSE
Ece2	517.382	-0.655271	0.198418	-3.30784	0.000940201	0.0301835	FALSE	FALSE
Sardhos	22.857	-0.750888	0.229536	-3.28961	0.00100328	0.0320705	FALSE	FALSE
Pqlc3	859.077	-0.474397	0.144446	-3.2845	0.00102164	0.0325876	FALSE	FALSE
Tdrkh	205.475	-0.543128	0.165486	-3.28163	0.00103208	0.0327808	FALSE	FALSE
Rdh12	250.438	-0.496798	0.151364	-3.28179	0.00103149	0.0327808	FALSE	FALSE
Rpl7l1	3511.75	-0.40181	0.122693	-3.27509	0.00105628	0.0334072	FALSE	FALSE
Tmem136	25.6376	-0.660935	0.216156	-3.27353	0.00106214	0.0335213	TRUE	FALSE
Polr2h	652.033	-0.546618	0.167146	-3.27152	0.00106972	0.0336893	FALSE	FALSE
Clcc1	1658.57	-0.345101	0.10555	-3.26956	0.00107714	0.0338515	FALSE	FALSE
Agpat4	210.065	-0.608448	0.186683	-3.2614	0.00110862	0.03455	FALSE	FALSE
Pctp	95.5271	-0.607391	0.208101	-3.26038	0.00111263	0.0346028	FALSE	FALSE
Vim	6756.51	-0.295523	0.0907185	-3.25761	0.00112355	0.0347974	FALSE	TRUE
Abraxas1	658.895	-0.381322	0.11704	-3.25799	0.00112203	0.0347974	FALSE	FALSE
Mpp1	3234.32	-0.356056	0.109338	-3.25655	0.00112774	0.0348549	FALSE	FALSE
Kif13a	33.2531	-0.719029	0.227975	-3.25572	0.00113104	0.0348847	TRUE	FALSE
Ube2cbp	107.884	-0.722984	0.223775	-3.25258	0.00114364	0.0351282	FALSE	FALSE
Dpp4	2251.35	-0.411635	0.126654	-3.25026	0.00115301	0.0353433	FALSE	FALSE
Nob1	1764	-0.418927	0.129058	-3.24621	0.00116953	0.0357727	FALSE	TRUE
Impdh2	815.31	-0.383504	0.118594	-3.23364	0.00122224	0.0368273	FALSE	FALSE
Ccdc86	678.818	-0.564297	0.174783	-3.23019	0.00123708	0.0370825	FALSE	FALSE
B230216N24Rik	13.5128	-0.54153	0.193858	-3.22814	0.00124599	0.0371787	FALSE	FALSE
Ceacam15	5.22984	-0.58325	0.197422	-3.22716	0.00125025	0.0371787	FALSE	FALSE
Rassf7	502.614	-0.438255	0.135873	-3.22522	0.00125874	0.0373569	FALSE	FALSE
Fhl2	42.8132	-0.728529	0.227639	-3.22409	0.00126374	0.0374308	FALSE	FALSE
Rd3	31.8931	-0.725275	0.22957	-3.22088	0.00127797	0.0377027	FALSE	FALSE
Clns1a	3399.58	-0.381123	0.118491	-3.21664	0.001297	0.0381874	FALSE	FALSE
Mrps27	849.784	-0.443369	0.13787	-3.21609	0.00129952	0.0381874	FALSE	FALSE
Fam136a	876.395	-0.338704	0.105496	-3.21058	0.00132467	0.03885	FALSE	FALSE
Mmachc	186.538	-0.610624	0.190462	-3.20745	0.00133917	0.0391215	FALSE	FALSE
Tmed5	2030.48	-0.36354	0.113564	-3.20129	0.00136815	0.039605	FALSE	TRUE
Pwp1	2161.88	-0.388691	0.121428	-3.20111	0.00136898	0.039605	FALSE	FALSE
9130401M01Rik	876.102	-0.397063	0.124016	-3.20176	0.00136592	0.039605	FALSE	FALSE
Zfyve19	908.351	-0.485966	0.151896	-3.19978	0.00137534	0.039712	FALSE	FALSE
Orai3	404.722	-0.560807	0.175672	-3.19357	0.00140524	0.0401409	FALSE	FALSE
Pnp	753.162	-0.500937	0.156897	-3.19335	0.00140633	0.0401409	FALSE	FALSE
Pecr	99.5904	-0.708911	0.223659	-3.18851	0.00143009	0.0405912	FALSE	FALSE
Golm1	1235.61	-0.541242	0.1699	-3.18711	0.00143702	0.0407056	FALSE	FALSE
2610301B20Rik	143.048	-0.694283	0.218872	-3.18436	0.00145076	0.041017	FALSE	FALSE
Bmp8b	205.568	-0.435961	0.136926	-3.183	0.00145757	0.0411317	FALSE	FALSE
Prpf31	3052.44	-0.330816	0.103992	-3.1812	0.00146664	0.0412367	FALSE	FALSE
BC051537	50.9185	-0.721347	0.229164	-3.17901	0.00147778	0.0414112	FALSE	FALSE
Bcap29	1942.07	-0.458254	0.14443	-3.17332	0.00150705	0.042051	FALSE	FALSE
Mrpl45	1095.83	-0.473888	0.149489	-3.17061	0.00152119	0.0423663	FALSE	FALSE
Nt5c	3564.56	-0.499791	0.158216	-3.15987	0.00157842	0.0436498	FALSE	FALSE
As3mt	375.773	-0.543036	0.17214	-3.15518	0.00160402	0.0441785	FALSE	FALSE
Abhd6	589.708	-0.418301	0.132624	-3.15416	0.00160963	0.0442515	FALSE	FALSE
Wdr60	32.0136	-0.605668	0.210221	-3.15199	0.00162164	0.0443128	FALSE	FALSE
Dnah11	226.16	-0.567801	0.180076	-3.153	0.00161601	0.0443128	FALSE	FALSE
Fbxw17	262.237	-0.632936	0.20106	-3.1517	0.00162324	0.0443128	FALSE	FALSE
Entpd1	499.396	-0.634717	0.201747	-3.15161	0.00162373	0.0443128	TRUE	FALSE
Nifk	2565.61	-0.444973	0.141351	-3.14846	0.00164136	0.0444686	FALSE	TRUE
Slc7a4	32.9869	-0.584358	0.206306	-3.14907	0.00163792	0.0444686	FALSE	FALSE
Zfp563	142.665	-0.626496	0.199291	-3.14666	0.00165146	0.0446612	FALSE	FALSE
Mgme1	189.174	-0.587122	0.186892	-3.1435	0.00166938	0.0449828	FALSE	FALSE
Hspe1	628.974	-0.586554	0.186931	-3.14062	0.00168593	0.0451842	FALSE	TRUE
Elp6	346.055	-0.433204	0.137907	-3.14075	0.00168513	0.0451842	FALSE	FALSE
6030468B19Rik	5.97945	-0.276374	0.138259	-3.13881	0.00169634	0.0453816	FALSE	FALSE
Fkbp7	38.3544	-0.71173	0.230318	-3.13531	0.00171675	0.0455583	FALSE	FALSE
Rwdd3	118.59	-0.661778	0.211453	-3.13506	0.0017182	0.0455583	FALSE	FALSE
Zcchc7	1626.72	-0.508837	0.162457	-3.13317	0.00172929	0.0457709	FALSE	FALSE
Serpina3g	451.246	-0.707934	0.229213	-3.12909	0.00175346	0.0463285	TRUE	FALSE
Ptrh1	38.1783	-0.702569	0.225679	-3.12644	0.00176935	0.0466201	FALSE	FALSE
Hist1h4c	65.0371	-0.574606	0.183661	-3.12621	0.00177074	0.0466201	FALSE	TRUE
Atf6	124.579	-0.682914	0.219373	-3.12507	0.00177762	0.0467034	FALSE	TRUE
Tex15	17.042	-0.306946	0.147164	-3.12465	0.00178016	0.0467034	FALSE	FALSE
Clybl	189.183	-0.669075	0.215158	-3.12079	0.00180365	0.0470854	FALSE	FALSE
1810062G17Rik	28.3894	-0.678399	0.225358	-3.11615	0.00183229	0.0476522	FALSE	FALSE
Tefm	399.464	-0.597372	0.192186	-3.11152	0.00186124	0.0482372	FALSE	FALSE
Tma16	174.15	-0.48333	0.155374	-3.1101	0.00187027	0.0483871	FALSE	FALSE
Snx10	304.2	-0.57779	0.186188	-3.10521	0.00190147	0.0488671	FALSE	FALSE
Gm45507	62.6178	-0.625717	0.201366	-3.10463	0.00190519	0.0488671	FALSE	FALSE
Gm14493	63.2038	-0.661869	0.213689	-3.10045	0.0019323	0.0493082	FALSE	FALSE
Ruvbl1	1553.79	-0.394167	0.127356	-3.09515	0.00196714	0.0499258	FALSE	FALSE
Pck2	511.296	-0.525947	0.169992	-3.09474	0.00196987	0.0499258	FALSE	FALSE
Rabl2	10.8438	-0.51001	0.191179	-3.0956	0.00196413	0.0499258	FALSE	FALSE

## Sheet: Table S3 All CLIP UTR
All_CLIP_3UTR
0610037L13Rik
1190002N15Rik
1810013L24Rik
1810037I17Rik
1810055G02Rik
2310057M21Rik
2410004B18Rik
2510039O18Rik
3110002H16Rik
4930544G11Rik
8030462N17Rik
9530068E07Rik
Aars
Abce1
Abhd10
Abhd2
Abl2
Ablim1
Abr
Abracl
Abtb2
Acin1
Acly
Aco2
Acot7
Acox1
Acsl4
Actb
Actl6a
Actn1
Actn4
Actr1a
Actr2
Actr3
Acvr1
Adam19
Adamts6
Adgre5
Adipor1
Adipor2
Adk
Ado
Adss
Aebp2
Aff1
Aff4
Agap3
Agfg1
Ago2
Ago3
Agpat1
Agpat3
Agpat5
Ahctf1
Ahcyl2
Ahi1
Ahnak
AI597479
Ak2
Ak3
Akap10
Akap11
Akap13
Akirin1
Akt1
Akt3
Aldh18a1
Aldoa
Alkbh5
Alkbh6
Als2cl
Alyref
Amfr
Ampd2
Ankib1
Ankrd13c
Ankrd44
Ankrd49
Ankrd50
Ankrd52
Anp32a
Anp32e
Anxa5
Aoc3
Ap1ar
Ap1g1
Ap1s3
Ap3b1
Api5
Aplp2
Arap2
Areg
Arf3
Arf4
Arf6
Arglu1
Arhgap11a
Arhgap5
Arhgdia
Arhgdib
Arhgef1
Arhgef10
Arhgef2
Arhgef3
Arhgef7
Arid1a
Arid2
Arid3a
Arid3b
Arid4a
Arid4b
Arih1
Arl2bp
Arl5a
Arl5b
Arl6ip1
Arl6ip6
Arl8a
Arl8b
Armc1
Arpc2
Arpc3
Arpc4
Arpc5
Arpp19
Arrb1
Asxl1
Atad1
Atad2b
Atf1
Atf4
Atf6
Atf6b
Atf7
Atg13
Atg4d
Atl3
Atn1
Atp10a
Atp11b
Atp13a3
Atp1a1
Atp1b1
Atp1b3
Atp2a2
Atp2b1
Atp2b4
Atp5a1
Atp5f1
Atp6ap1
Atp6v0e2
Atp6v1b2
Atp6v1d
Atp6v1e1
Atp6v1h
Atrx
Atxn1
Atxn2
Atxn2l
Atxn7l3
AU019823
Azin1
B230219D22Rik
B2m
B3galt6
B3gnt2
B4galt5
Bach2
Bax
Baz2a
Bbx
BC030336
BC031181
BC048403
Bccip
Bcdin3d
Bcl10
Bcl11b
Bcl2
Bcl2l1
Bcl2l11
Bcl2l13
Bcl6b
Bclaf1
Bcor
Bdh1
Bdp1
Bend3
Bhlhe40
Bicd2
Bicra
Birc3
Birc6
Blcap
Bloc1s3
Bloc1s4
Bnip2
Bptf
Braf
Brd1
Brd2
Brd3
Brd4
Brix1
Brk1
Bsdc1
Bsg
Btaf1
Btbd7
Btg1
Btg2
Btla
Bzw1
C1qbp
C2cd2l
Cab39
Cacybp
Calcrl
Calm1
Calm2
Calm3
Calr
Calu
Camsap2
Camta2
Canx
Cap1
Capn1
Caprin1
Capza2
Capzb
Card19
Carm1
Casp3
Casp6
Casp8
Casp8ap2
Cbarp
Cbfb
Cbl
Cblb
Cbwd1
Cbx3
Cbx4
Cbx5
Cbx6
Ccdc25
Ccdc34
Ccdc50
Ccdc59
Ccdc82
Ccdc88c
Ccdc97
Ccl22
Ccl3
Ccl4
Ccna2
Ccnb1
Ccnd2
Ccnd3
Ccne2
Ccng1
Ccng2
Ccni
Ccnt1
Ccnt2
Ccp110
Ccr5
Ccr7
Ccser2
Cct2
Cct7
Cct8
Cd164
Cd2
Cd200
Cd247
Cd24a
Cd27
Cd274
Cd28
Cd3e
Cd3g
Cd4
Cd40lg
Cd44
Cd47
Cd53
Cd55
Cd69
Cd82
Cdc25a
Cdc27
Cdc37l1
Cdc40
Cdc42
Cdc42se1
Cdc42se2
Cdc45
Cdca4
Cdk1
Cdk12
Cdk17
Cdk19
Cdk2
Cdk4
Cdk5r1
Cdk6
Cdk7
Cdkn1a
Cdkn1b
Cdkn2d
Cdr2
Cds2
Cdv3
Cdyl
Cdyl2
Cebpb
Cebpg
Celf1
Celf2
Cenpe
Cep104
Cep120
Cep170
Cep350
Cep97
Cept1
Cfap97
Cfl1
Cfl2
Cflar
Cggbp1
Chac1
Chchd10
Chchd4
Chd1
Chd2
Chd4
Chd7
Chfr
Chic2
Chm
Chmp1b
Chmp2b
Chmp4b
Chmp5
Chmp7
Chordc1
Chst11
Chst15
Chsy1
Chuk
Ciao1
Ciapin1
Cirbp
Cish
Ckb
Cklf
Clasp2
Clcf1
Clcn3
Clcn5
Cldnd1
Clec2i
Clic1
Clic4
Clint1
Clip1
Clk1
Clk4
Clspn
Cltb
Cltc
Cmas
Cmtm4
Cmtm6
Cnbp
Cnih1
Cnot6
Cnot6l
Cnst
Coa5
Col4a3bp
Commd8
Comt
Copb1
Cops7a
Coq10b
Cox17
Cox18
Cox19
Cox4i1
Cox5a
Cox7a2
Cpne1
Cpped1
Cpsf6
Cramp1l
Creb1
Creb3l2
Creld2
Crem
Crk
Crlf3
Cry1
Crybg1
Cs
Csf2
Csk
Csnk1a1
Csnk1e
Csnk1g2
Csnk1g3
Csnk2a1
Csnk2b
Csrnp1
Csrnp2
Ctage5
Ctdspl2
Ctla4
Ctps
Ctsc
Cul3
Cxcl10
Cxcl2
Cyb5a
Cyb5b
Cyfip2
Cyp51
Cyth1
Cytip
D16Ertd472e
D17Wsu92e
Dcaf10
Dcaf12
Dcaf5
Dcaf7
Dck
Dcp1a
Dcp2
Dctn3
Dcun1d2
Dcun1d3
Dcun1d4
Dcun1d5
Dda1
Ddit4
Ddx21
Ddx39b
Ddx3x
Ddx3y
Ddx46
Ddx47
Ddx5
Ddx6
Def6
Degs1
Dek
Dennd1b
Dennd2d
Dennd4a
Dennd4b
Derl1
Dgka
Dgkd
Dhps
Dhrs1
Dhx15
Dhx29
Dhx30
Dhx9
Diaph1
Dimt1
Dip2b
Dlat
Dlg4
Dlst
Dmxl1
Dnaja1
Dnajb13
Dnajc21
Dnajc27
Dnajc7
Dnajc8
Dnal4
Dnmt1
Dnmt3a
Dock10
Dock8
Dok1
Dok2
Dot1l
Dpysl2
Dusp1
Dusp11
Dusp2
Dusp4
Dusp5
Dusp6
Dut
Dync1i2
Dynll1
Dynlrb1
Dyrk1a
Dyrk2
E2f1
E2f3
E2f7
E430018J23Rik
Eaf1
Ebna1bp2
Edem1
Edem3
Edrf1
Eef1a1
Eef1e1
Eef2
Egln3
Egr1
Egr2
Egr3
Ehd1
Ehd4
Eif1
Eif1a
Eif2a
Eif2ak3
Eif2s1
Eif2s2
Eif4a1
Eif4b
Eif4ebp2
Eif4g2
Eif4g3
Eif5
Eif5a
Elavl1
Elk1
Elk4
Ell2
Elmo1
Elmod2
Elmsan1
Eloa
Elovl5
Elovl6
Emc1
Emc6
Emc8
Emg1
Emp1
Emsy
Enc1
Entpd5
Ep300
Epc2
Erbin
Erg28
Ergic1
Eri1
Erich1
Ermp1
Ern1
Ero1l
Erp44
Esco1
Esf1
Esyt2
Etf1
Etnk1
Ets1
Ets2
Etv6
Evl
Exoc2
Exoc5
Extl3
Ezr
F2r
F2rl2
F3
Faf2
Fam102a
Fam102b
Fam107b
Fam120a
Fam129a
Fam133b
Fam160b1
Fam174a
Fam208b
Fam3c
Fam49b
Fam53b
Fam76b
Fam84b
Fam8a1
Fam98b
Fasn
Fbrs
Fbxl14
Fbxl3
Fbxo11
Fbxo3
Fbxo42
Fbxo45
Fbxo9
Fbxw11
Fcho1
Fchsd2
Fdx1l
Fem1a
Fgfr1op
Fhl3
Ficd
Fkbp1a
Fmnl1
Fn3krp
Fnbp1
Fnbp4
Fos
Fosl1
Fosl2
Foxj2
Foxj3
Foxk1
Foxk2
Foxn2
Foxn3
Foxo1
Foxp1
Foxp4
Frg1
Frmd4b
Frrs1
Furin
Fus
Fxr1
Fxr2
Fxyd5
Fyttd1
G3bp1
G3bp2
Gabpa
Gabpb1
Gadd45b
Galnt2
Gata3
Gatad2a
Gbp2
Gbp3
Gbp4
Gbp7
Gbp9
Gch1
Gdi1
Gem
Gfer
Gfi1
Gfod1
Gfpt1
Ggps1
Ghitm
Gimap3
Gimap5
Gimap8
Gimap9
Ginm1
Git1
Git2
Gja1
Glipr1
Gls
Gltp
Glud1
Glul
Gm2a
Gm38394
Gmfb
Gmppb
Gna13
Gnai2
Gnas
Gnb1
Gnb2
Gng2
Gnl3l
Golga3
Golph3
Golt1b
Gon7
Got1
Gpatch8
Gpbp1
Gpd1l
Gpd2
Gpr171
Gpr174
Gpr183
Gramd1a
Gramd1b
Gramd3
Gramd4
Grap2
Grasp
Grb2
Gripap1
Grk2
Grpel2
Grsf1
Gse1
Gsk3b
Gspt1
Gsr
Gstcd
Gtf2a1
Gtf2a2
Gtf2e1
Gtf2e2
Gtf3c1
Gtf3c2
Gtpbp1
Gtpbp4
Gypc
Gzmb
H2-D1
H2-K1
H2-M3
H2afx
H2afy
H3f3b
Hars
Hbegf
Hccs
Hdac1
Hdac2
Hdac7
Hdgf
Hdgfl3
Heatr5b
Hectd1
Hells
Helq
Herc2
Hif1a
Hipk1
Hipk2
Hipk3
Hist1h1a
Hist1h1c
Hist1h1d
Hist1h1e
Hist1h1t
Hist1h2ab
Hist1h2ac
Hist1h2ad
Hist1h2ae
Hist1h2ag
Hist1h2ao
Hist1h2ap
Hist1h2bc
Hist1h2be
Hist1h2bf
Hist1h2bg
Hist1h2bh
Hist1h2bk
Hist1h2bm
Hist1h3a
Hist1h3b
Hist1h3c
Hist1h3d
Hist1h3f
Hist1h3g
Hist1h4a
Hist1h4b
Hist1h4c
Hist1h4d
Hist1h4f
Hist1h4h
Hist1h4j
Hist2h2aa1
Hist2h2ac
Hist2h3b
Hist2h4
Hist3h2a
Hivep1
Hivep2
Hivep3
Hjurp
Hk2
Hmbox1
Hmgb2
Hmgcr
Hmgcs1
Hmgxb3
Hmgxb4
Hmmr
Hnrnpa0
Hnrnpa1
Hnrnpa2b1
Hnrnpab
Hnrnpd
Hnrnph1
Hnrnpk
Hnrnpl
Hnrnpll
Hnrnpm
Hnrnpu
Hnrnpul1
Hopx
Hpcal1
Hprt
Hs3st3b1
Hs6st1
Hsbp1
Hsd17b7
Hsp90ab1
Hspa13
Hspa5
Hspa8
Hspa9
Hspb11
Hspe1
Hsph1
Huwe1
Hyou1
Hypk
Icam1
Icos
Id2
Idh3a
Ier3
Ier3ip1
Ifi203
Ifi47
Ifng
Ifrd1
Igbp1
Igf1r
Igf2r
Igtp
Ikbkg
Ikzf1
Ikzf3
Ikzf4
Ikzf5
Il10
Il10ra
Il13
Il15ra
Il17f
Il2
Il21
Il21r
Il22
Il24
Il2ra
Il2rg
Il3
Il31
Il4
Il6ra
Il6st
Imp3
Imp4
Impad1
Ing1
Ing5
Inhba
Ino80
Ino80d
Ino80e
Inpp4a
Inpp4b
Inpp5a
Inpp5b
Insig1
Ints13
Ipcef1
Ipmk
Ipo7
Ipo8
Irak1
Irf1
Irf2
Irf2bp1
Irf2bp2
Irf4
Irf8
Irgm2
Irs2
Itch
Itgal
Itgav
Itgb1
Itgb2
Itih5
Itk
Itm2a
Itm2c
Itpkb
Ivns1abp
Jade1
Jade2
Jagn1
Jak2
Jarid2
Jun
Junb
Jund
Kansl1
Kansl3
Kat6a
Kat7
Kbtbd11
Kbtbd2
Kcmf1
Kcna3
Kcnab2
Kcnq5
Kctd10
Kctd12
Kctd13
Kctd9
Kdelr2
Kdm1a
Kdm2b
Kdm4c
Kdm5b
Kdm5c
Kdm6a
Kdm6b
Kdm7a
Kdsr
Khdrbs1
Kif14
Kif1b
Kif1bp
Kif21b
Kif3b
Kif5b
Klf10
Klf16
Klf2
Klf3
Klf6
Klf7
Klhl18
Klhl2
Klhl20
Klhl21
Kmt2a
Kmt2b
Kmt2d
Kmt5a
Kmt5b
Kpna1
Kpna4
Kpnb1
Kras
Krcc1
Ktn1
Laptm5
Larp1
Larp4
Larp4b
Lars
Lars2
Lasp1
Lat
Lats1
Lats2
Lbh
Lbhd1
Lcor
Lcp1
Lcp2
Ldb1
Ldha
Ldlr
Lef1
Leng8
Leo1
Leprotl1
Lfng
Lif
Lig4
Lin52
Lin7c
Lipg
Lman1
Lmnb1
Lmtk2
Lnpep
Lnx2
Lpgat1
Lrch1
Lrch3
Lrig1
Lrrc47
Lrrc58
Lrrc61
Lrrc8c
Lrrfip1
Lsm12
Lsm2
Lsm8
Lsp1
Lta
Ltv1
Luc7l2
Luc7l3
Ly6a
Ly6c1
Ly9
Lyar
Lyrm9
Lyst
Lzic
M6pr
Macf1
Madd
Maf
Maff
Mafg
Mafk
Magoh
Magohb
Mak16
Malt1
Man1a
Man1a2
Man2a2
Manf
Map2k3
Map2k4
Map2k7
Map3k1
Map3k2
Map3k7
Map3k8
Map4
Mapk1
Mapk14
Mapk1ip1l
Mapk3
Mapk6
Mapkapk2
Mapre1
March6
Mark2
Mark4
Mars2
Mat2a
Max
Maz
Mbd2
Mbnl1
Mbnl2
Mbp
Mbtps2
Mcl1
Mcm10
Mcm3
Mcu
Mdfic
Mdh2
Mdm1
Mdm2
Mdn1
Mecp2
Med1
Med13
Med13l
Med14
Med28
Mef2a
Mef2d
Metap1
Mfhas1
Mfsd14a
Mfsd2a
Mfsd7b
Mgat5
Mgea5
Mib1
Mief1
Mier1
Mier2
Mindy3
Minos1
Minpp1
Mkrn2
Mlec
Mllt11
Mllt3
Mllt6
Mlx
Mnt
Mob1a
Mob4
Mon1b
Morc2a
Mphosph10
Mphosph6
Mphosph9
Mrpl18
Mrpl19
Mrpl33
Mrpl53
Mrpl57
Mrps14
Mrps6
Mrto4
Ms4a4b
Ms4a6b
Msi2
Msl1
Msn
Mt1
Mta1
Mtdh
Mtf2
Mthfd2
Mtpn
Mxd1
Mxi1
Myc
Myh9
Myl12a
Myl12b
Myo10
Myo1c
Mysm1
Naa15
Naa50
Nab2
Nabp1
Nacc1
Nadk
Naf1
Nap1l1
Nap1l4
Napa
Nbr1
Ncapd3
Ncaph
Ncaph2
Ncdn
Nckap5l
Ncl
Ncoa2
Ncoa5
Ncoa7
Ncstn
Ndel1
Ndfip2
Ndrg1
Ndufa6
Nedd1
Nedd9
Nefh
Nek7
Nemp1
Net1
Nf2
Nfat5
Nfatc1
Nfatc2
Nfatc2ip
Nfe2l1
Nfil3
Nfix
Nfkb1
Nfkb2
Nfkbia
Nfkbib
Nfkbid
Nfyb
Nifk
Nipsnap3b
Nlk
Nlrc5
Nob1
Noct
Nol10
Nom1
Nomo1
Nop10
Nop58
Notch1
Notch2
Npat
Nploc4
Npm1
Nptn
Nr4a1
Nr4a2
Nr4a3
Nrip1
Nrros
Nsd1
Nsfl1c
Nsmce1
Nsmce4a
Nsun5
Nt5dc3
Nucks1
Nudcd3
Nudt3
Nufip2
Nup107
Nup153
Nup160
Nup188
Nup88
Nup93
Nup98
Nus1
Nxpe3
Odf2
Ogdh
Ola1
Opa1
Osbpl5
Osbpl8
Osm
Ostf1
Otud6b
Oxa1l
Pabpc1
Pafah1b1
Pafah1b2
Paip1
Pak2
Pank3
Papd7
Papola
Papolg
Pard6g
Parg
Parp2
Parp8
Parvg
Patj
Pbx2
Pcbp1
Pcbp2
Pclaf
Pcmt1
Pdap1
Pdcd2l
Pdcd6
Pdcd7
Pdcl
Pde3b
Pde4b
Pde4dip
Pdgfb
Pdhx
Pdia3
Pdia4
Pdlim5
Pdpk1
Pdxk
Pdzd8
Pecam1
Peli1
Per1
Per2
Pfas
Pfdn2
Pfdn4
Pfdn5
Pfkfb3
Pfkp
Pfn1
Pgm1
Pgm2l1
Pgs1
Phf2
Phf6
Phip
Phlda1
Pi4k2b
Pias4
Picalm
Pik3ca
Pik3cd
Pik3r1
Pim1
Pim3
Pin1
Pip4k2c
Pip5k1a
Pitpnb
Pitpnm2
Pkm
Pla2g12a
Plac8
Plaur
Plbd2
Plcxd2
Plek
Plekha2
Plekha3
Plekhj1
Plekhm3
Plk1
Plk2
Plk3
Plk4
Plscr1
Pmepa1
Pmpcb
Pnn
Pno1
Pnrc1
Pofut2
Pole4
Polr3d
Polr3e
Polr3f
Polr3g
Pot1a
Pou2af1
Pou2f1
Pou2f2
Ppat
Ppfia1
Pphln1
Ppif
Ppip5k2
Ppm1a
Ppm1g
Ppm1h
Ppp1cb
Ppp1r15a
Ppp1r15b
Ppp1r16b
Ppp2r1a
Ppp2r1b
Ppp2r2a
Ppp3cc
Ppp3r1
Ppp4r3a
Ppp5c
Ppp6c
Ppp6r3
Pptc7
Prag1
Prdm1
Prdm4
Prdx1
Prdx3
Prelid3b
Prkaca
Prkar1a
Prkca
Prkcd
Prkch
Prkrip1
Prkx
Prmt5
Prpf40a
Prpf4b
Prps1
Prps2
Prr11
Prrc2b
Psen1
Pskh1
Psmd7
Psmd8
Psme3
Psph
Ptar1
Ptbp1
Ptbp3
Ptger2
Ptger4
Ptges3
Ptgs2
Ptk2b
Ptma
Ptms
Ptpn1
Ptpn4
Ptprc
Ptprcap
Ptrhd1
Pum2
Pum3
Purb
Pus7
Pvr
Pwp2
Pym1
Qsox2
Qtrt2
Rab10
Rab11a
Rab11fip4
Rab18
Rab21
Rab22a
Rab24
Rab2b
Rab3ip
Rab5c
Rab6a
Rab8b
Rabep1
Rabgap1
Rabggtb
Rac1
Rack1
Rad17
Rad21
Rad51d
Rad54l2
Ralgapa2
Ralgapb
Ralgds
Ranbp1
Ranbp9
Rap1b
Rap2a
Rap2c
Rapgef6
Rasa2
Rasgef1b
Rasgrp1
Rassf5
Raver1
Rb1
Rbbp4
Rbm12b2
Rbm14
Rbm15b
Rbm17
Rbm18
Rbm22
Rbm25
Rbm27
Rbm38
Rbm4
Rbms1
Rbmx2
Rbx1
Rc3h1
Rc3h2
Rcc2
Rcn2
Rdx
Rel
Rest
Retreg1
Rexo1
Rexo2
Rftn1
Rgcc
Rgmb
Rgs1
Rgs10
Rgs16
Rhbdf2
Rheb
Rhoa
Rhoh
Rhot1
Rhot2
Ric1
Ric8b
Rictor
Rif1
Riok1
Ripk2
Rmdn3
Rmnd5a
Rnf11
Rnf111
Rnf115
Rnf126
Rnf145
Rnf157
Rnf19a
Rnf19b
Rnf2
Rnf20
Rnf225
Rnf34
Rnf38
Rnf4
Rnf41
Rnf44
Rnpc3
Rock1
Rock2
Rp9
Rpa3
Rpf2
Rpl13
Rpl18
Rpl23
Rpl32
Rpl39
Rpl4
Rplp0
Rplp1
Rps10
Rps15a
Rps26
Rps27rt
Rps3
Rps6ka3
Rptor
Rrm2
Rrn3
Rrp1b
Rrp9
Rrs1
Rsbn1l
Rsrc2
Rtn3
Rundc3b
Runx1
Runx2
Runx3
Ruvbl2
Rwdd4a
Sacm1l
Safb
Samsn1
Sap130
Sarnp
Satb1
Sbno1
Sbno2
Scaf4
Scamp3
Scd2
Sdcbp
Sdccag3
Sde2
Sdf2l1
Sdf4
Sdhaf3
Sdr39u1
Sec13
Sec23b
Sec61a1
Secisbp2l
Seh1l
Selenof
Selenoi
Selenok
Selenop
Selenos
Selenot
Sell
Sema4c
Sema4d
Sema7a
Senp1
Senp2
Senp5
Sephs2
Sept11
Sept2
Sept7
Sept9
Serbp1
Serinc1
Serinc3
Serp1
Sertad2
Sesn3
Set
Setd1a
Setd1b
Setd5
Sf1
Sf3a3
Sf3b1
Sf3b2
Sf3b3
Sf3b6
Sfmbt1
Sfpq
Sgcb
Sgms2
Sh3bp1
Sh3glb1
Sh3rf1
Shf
Shisa5
Shmt2
Shoc2
Sik1
Sik3
Sin3b
Sipa1l3
Sirt1
Ska2
Ski
Skil
Skiv2l2
Skp2
Sla
Slain2
Slamf1
Slamf7
Slbp
Slc12a4
Slc16a1
Slc16a10
Slc16a3
Slc16a6
Slc1a5
Slc25a17
Slc25a25
Slc25a3
Slc25a32
Slc25a4
Slc2a1
Slc2a3
Slc30a5
Slc30a9
Slc35a1
Slc35a3
Slc35c1
Slc35e1
Slc37a1
Slc38a1
Slc38a2
Slc39a1
Slc39a9
Slc41a1
Slc4a2
Slc4a7
Slc5a3
Slc6a6
Slc7a1
Slc7a5
Slc7a6
Slc9a6
Slf2
Smad7
Smarca5
Smarcc1
Smc2
Smc3
Smchd1
Smco4
Smg7
Smg8
Smim15
Smim26
Smim3
Smim7
Smndc1
Smyd3
Snd1
Snrk
Snrpb2
Snrpc
Snrpd3
Snrpf
Snx18
Snx27
Snx3
Socs1
Socs3
Socs4
Socs7
Sod2
Sos1
Sos2
Sox4
Sp1
Sp100
Sp110
Sp2
Sp3
Spag7
Spag9
Spcs2
Spcs3
Spint2
Spn
Spop
Spred1
Sprtn
Spry1
Spsb1
Sptbn1
Sptssa
Srebf2
Srfbp1
Srgn
Srm
Srp14
Srp72
Srpk1
Srprb
Srrm2
Srsf1
Srsf11
Srsf2
Srsf4
Srsf5
Srsf6
Srsf7
Srsf9
Ssh2
Ssr1
Ssr2
Ssr3
Sssca1
St13
St3gal1
St3gal4
St8sia6
Stag2
Stambpl1
Stap1
Stard3nl
Stat1
Stat5a
Stat5b
Stim1
Stip1
Stk17b
Stk24
Stk26
Stk4
Stk40
Stra6
Strap
Stt3b
Stub1
Stx11
Stx12
Stx6
Sub1
Suco
Sugp2
Sumo3
Sun2
Supt16
Supt6
Surf6
Susd6
Suz12
Swt1
Syf2
Syncrip
Sys1
Syvn1
Tab2
Tacc1
Taf12
Taf4
Taf5
Taf5l
Tagap
Tagln2
Taok1
Taok3
Tap2
Tapt1
Tarbp1
Tardbp
Tax1bp1
Tbc1d1
Tbc1d10a
Tbc1d13
Tbc1d15
Tbc1d22b
Tbc1d2b
Tbl3
Tbx21
Tcerg1
Tcf12
Tcf25
Tcf7
Tcof1
Tdp2
Tes
Tespa1
Tet2
Tet3
Tfap4
Tfdp1
Tfrc
Tgfb1
Tgfbr2
Tgif1
Tgoln1
Thada
Thap1
Them6
Thoc2
Thy1
Tigar
Timm17a
Timm8b
Tiparp
Tipin
Tjap1
Tle3
Tle4
Tlnrd1
Tm9sf3
Tmc8
Tmed2
Tmed5
Tmed7
Tmem109
Tmem170b
Tmem189
Tmem2
Tmem201
Tmem248
Tmem251
Tmem258
Tmem263
Tmem30a
Tmem38b
Tmem50a
Tmem57
Tmem64
Tmem68
Tmem71
Tmem87a
Tmf1
Tmod3
Tmpo
Tmsb10
Tmsb4x
Tmx1
Tnf
Tnfaip3
Tnfrsf10b
Tnfrsf1b
Tnfrsf4
Tnfrsf9
Tnfsf11
Tnfsf8
Tnfsf9
Tnks
Tnks2
Tnpo1
Tnpo2
Tob2
Tollip
Tomm34
Tomm40
Tomm70a
Top1
Top2a
Top2b
Tor1aip1
Tor4a
Tox
Tpm1
Tpm3
Tpm4
Tprgl
Tpst2
Tra2a
Tra2b
Traf1
Traf4
Traf6
Trak2
Tram1
Tram2
Trappc10
Trappc2l
Trappc4
Trappc6b
Trappc8
Trib2
Trim30a
Trim37
Trim44
Trim56
Trim8
Trio
Trip11
Trir
Trmo
Trp53
Trp53inp1
Trpc4ap
Trrap
Tsc22d2
Tsc22d4
Ttc39b
Tubb5
Tubgcp3
Tusc3
Twsg1
Txn1
Txnrd1
U2af1
U2af1l4
Uap1
Uba3
Uba6
Ubald1
Ubap2
Ubash3a
Ubb
Ubc
Ube2b
Ube2c
Ube2d3
Ube2f
Ube2g2
Ube2j1
Ube2q1
Ube2z
Ube3a
Ube4b
Ubl3
Ubqln1
Ubtf
Uck2
Ucp2
Ufm1
Ugcg
Uggt1
Uhmk1
Uhrf1bp1l
Uqcrc2
Uqcrfs1
Urb1
Usp1
Usp12
Usp16
Usp22
Usp25
Usp3
Usp31
Usp37
Usp39
Usp46
Utp23
Utp4
Utrn
Uvrag
Vamp2
Vapa
Vasp
Vav1
Vbp1
Vcpip1
Vdac1
Vdac2
Vegfa
Vhl
Vim
Vmp1
Vps13a
Vps36
Vps37a
Vps37b
Vps4a
Vps4b
Vsir
Wasf2
Washc4
Wbp11
Wdr1
Wdr26
Wdr43
Wdr75
Wdr77
Wdr89
Wipf1
Wipf2
Wiz
Wnk1
Wsb1
Xbp1
Xiap
Yaf2
Ybx1
Ybx3
Yipf4
Yod1
Yrdc
Ythdf1
Ywhae
Ywhag
[truncated: 58 more rows]

## Sheet: Table S4 Genesets_for_GSEA
Gene set:	Cell cycle	DNA replication	DNA repair	RNA polymerase	RNA degradation	Spliceosome	Ribosome biogenesis in eukaryotes	Aminoacyl tRNA biosynthesis	Proteasome	Apoptosis	Endocytosis	Lysosome	Leukocyte transendothelial migration	Unfolded protein response	Glycolysis	Citrate cycle TCA cycle	Oxidative phosphorylation	Fatty acid metabolism	One-carbon metabolic process	Cholesterol homeostasis	Amino sugar and nucleotide sugar metabolism	Inflammatory response	mTOR signaling pathway	PI3K Akt signaling pathway	JAK STAT signaling pathway	Calcium signaling pathway	Chemokine signaling pathway	FoxO signaling pathway	Notch signaling pathway	TNF signaling pathway	Toll like receptor signaling pathway	TGF beta signaling pathway	IL-2 receptor signalling	TCR signalling	T cell differentiation	Treg signature	Increased in IL-2	Decreased in IL-2	Increased in IL-7	Decreased in IL-7	Increased in IFNg	Decreased in IFNg
Source:	KEGG	KEGG	Hallmark	KEGG	KEGG	KEGG	KEGG	KEGG	KEGG	Hallmark	KEGG	KEGG	KEGG	Hallmark	Hallmark	KEGG	KEGG	KEGG	GO:0006730	Hallmark	KEGG	Hallmark	KEGG	KEGG	KEGG	KEGG	KEGG	KEGG	KEGG	KEGG	KEGG	KEGG	Manually curated	Manually curated	GO:0030217	https://doi.org/10.1016/j.immuni.2007.09.010	ImmGen cytokines (common gamma chain); GSE180020; Treg dataset	ImmGen cytokines (common gamma chain); GSE180020; Treg dataset	ImmGen cytokines (common gamma chain); GSE180020; Treg dataset	ImmGen cytokines (common gamma chain); GSE180020; Treg dataset	https://doi.org/10.1016/j.immuni.2012.06.014; GSE38686; 10h data	https://doi.org/10.1016/j.immuni.2012.06.014; GSE38686; 10h data
iCLIP targets	Ccnd1	Ssbp1	Polr2h	Polr2b	Dcps	Ddx46	Csnk2b	mt-Ta	Psmd3	Casp3	Arf6	Atp6v0a1	Jam3	Atf4	Pgk1	Cs	mt-Nd1	Acaca	Ahcyl1	Fdps	Chia1	Cxcl10	Slc7a5	Egf	Il2	Slc8a1	Cxcl1	Tgfb1	Dll1	Tnf	Tlr1	Chrd	Il2ra	Abl1	Bcl11a	Il2ra	Vim	Smc4	Ltb	Eef2	Efna5	Pfn2
	Ccnd2	Rnaseh1	Polr2a	Polr2a	Exosc1	Ddx39b	Csnk2a1	mt-Tr	Psmd12	Casp9	Pip5k1c	Atp6v0a2	Itgam	Herpud1	Aldoart1	Csl	mt-Nd2	Fasn	Ahcyl2	Cyp51	Chit1	Ccl2	Slc3a2	Tgfa	Il3	Slc8a2	Cxcl2	Tgfb2	Dll3	Tnfrsf1a	Tlr2	Nog	Il2rb	Abl2	Bcl2	March3	Il2ra	Cd5	Gpr83	Ets1	Pros1	Spin2c
	Ccnd3	Rpa1	Polr2g	Polr2c	Exosc2	Dhx16	Csnk2a2	mt-Tn	Psmd11	Dffa	Pip5k1b	Tcirg1	Itgb2	Parn	Aldoart2	Acly	mt-Nd3	Mcat	Aldh1l1	Idi1	Hexa	Fpr1	Slc38a9	Ereg	Il4	Slc8a3	Cxcl3	Tgfb3	Dll4	Bag4	Tlr6	Nbl1	Il2rg	Akt1	Bcl2a1d	1110032F04Rik	Gpr83	Kcnn4	Tnfrsf4	Lcp1	Il4i1	Kit
	Cdk4	Pcna	Polr2e	Polr2j	Exosc3	Dhx38	Nol6	mt-Td	Psmd6	Casp7	Pip5k1a	Atp6v0a4	Itgb2l	Exosc4	Aldoa	Aco2	mt-Nd4	Oxsm	Aldh1l2	Fdft1	Hexb	Ccl20	Atp6v1a	Areg	Il5	Atp2b1	Cxcl5	Tgfbr1	Jag1	Tradd	Lbp	Thbs1	Jak1	Akt2	Cacnb4	2010111I01Rik	Lrrc32	Klf13	Tnfrsf18	Msn	Il24	Nacc2
	Cdk6	Dna2	Polr2f	Polr2d	Exosc8	Cdc40	Rrp7a	mt-Tc	Psmd7	Cflar	Pip5kl1	Atp6v0d1	Jam2	Hsp90b1	Eno1b	Aco1	mt-Nd4l	Hadh	Car6	Dhcr7	Nagk	Il1a	Atp6v1b2	Fgf1	Il6	Atp2b3	Ppbp	Tgfbr2	Jag2	Traf2	Cd14	Dcn	Jak3	Akt3	Cd4	2510009E07Rik	Mat2a	Sesn1	Cish	Uba1	Lad1	Tnfaip8l2
	Rb1	Fen1	Polr2c	Polr2g	Exosc6	Prpf18	Wdr43	mt-Tq	Psmd13	Birc3	Pld2	Atp6v0d2	Itga4	Xbp1	Eno1	Idh1	mt-Nd5	Hadhb	Dhfr	Sqle	Pgm3	Ccl7	Atp6v1b1	Fgf2	Il7	Atp2b4	Cxcl9	Smad4	Lfng	Traf5	Ly96	Fmod	Stat1	Apbb1ip	Chd7	2610042L04Rik	Cish	Smpdl3a	Twf2	Jak1	Rnf19b	Grb7
	Rbl1	Lig1	Polr2k	Polr2i	Exosc7	Dhx8	Utp4	mt-Te	Psmd14	Pmaip1	Pld1	Atp6v1h	Itgb1	Exosc9	Tpi1	Idh2	mt-Nd6	Mecr	Fpgs	Hmgcs1	Uap1	Ccl22	Atp6v1c1	Fgf3	Il9	Atp2b2	Cxcl10	Smad2	Mfng	Ripk1	Tlr3	Lefty1	Stat3	Bcl10	Ctnnb1	2810474O19Rik	Cmtm6	Tsc22d3	mt-Nd2	Cdc42se2	Cnr2	Evpl
	Rbl2	Pola1	Gtf2h3	Polr2e	Exosc4	Slu7	Utp15	mt-Tg	Psmd8	Casp8	Dnm2	Atp6ap1	Pecam1	Hspa5	Pfkp	Idh3g	Ndufs1	Acaa2	Gnmt	Nsdhl	Uap1l1	Cxcl11	Atp6v1c2	Fgf4	Il10	Chrm1	Cxcl11	Smad3	Rfng	Birc2	Tlr4	Lefty2	Stat5a	Braf	Dll4	6330403K07Rik	Nop56	Ripor2	Myc	Fam107b	Marcks	Amigo2
	Abl1	Pola2	Polr2d	Polr2f	Exosc5	Dhx15	Heatr1	mt-Th	Sem1	Jun	Dnm1	Atp6v0c	Itgal	Atf3	Ero1l	Idh3a	Ndufs2	Echs1	Mat1a	Lss	Gne	Ccr7	Atp6v1d	Fgf5	Il11	Chrm3	Cxcl12	Stk11	Notch1	Birc3	Tlr5	Fst	Stat5b	Cacna1f	Egr1	A630001O12Rik	Ecm1	Tcf7	Phc3	Rassf5	Aim1l	Pygl
	Hdac2	Prim1	Ercc3	Polr2h	Exosc9	Snrpb	Wdr75	mt-Ti	Psmd4	Bcl2l11	Dnm3	Atp6v0b	F11r	Exosc1	Aldob	Idh3b	Ndufs3	Hadha	Mat2a	Mvd	Renbp	Edn1	Atp6v1e1	Fgf7	Il12a	Chrm5	Cxcl13	Prkaa1	Notch2	Map3k7	Tlr7	Bmp2	Pik3r3	Cacnb3	Fadd	Abcb1a	Casp8	Id3	Rgs1	Lbr	Fbln2	Atp1b1
	Hdac1	Prim2	Ddb2	Polr2l	Dis3	Snrpd1	Utp18	mt-Tl2	Psmd2	Mcl1	Clta	Ctsa	Cdh5	Exosc5	Vegfa	4933405O20Rik	Ndufs4	Acsl1	Mat2b	Ldlr	Nans	Cd40	Atp6v1e2	Fgf8	Il12b	Adora2a	Cxcl16	Prkaa2	Notch3	Tab1	Tlr8	Bmp4	Pik3r1	Cacnb4	Gata3	Acot7	Myc	Btg2	Rexo2	Arhgef3	Ubd	Sdcbp2
	E2f1	Pold1	Polr1c	Polr3b	Exosc10	Snrpd2	Wdr36	mt-Tl1	Psmd1	Il1b	Cltb	Ctsb	Cldn34c4	Asns	Mxi1	Ogdh	Ndufs5	Acsl6	Mthfd1	Aldoc	Nanp	Cxcl9	Atp6v1f	Fgf9	Il13	Adora2b	Cxcl15	Prkab1	Notch4	Tab2	Ctsk	Bmp5	Pik3r2	Calm1	Gimap1	Adam19	Pdia4	Kif21b	Gm28112	Rasa3	Stat5a	Nme7
	E2f2	Pold2	Xpc	Polr3a	C1d	Snrpd3	Tbl3	mt-Tk	Adrm1	Sptan1	Cltc	Ctsc	Cldn34d	Arfgap1	Pkm	Ogdhl	Ndufs6	Acsbg2	Mthfd1l	Ebp	Npl	Il6	Atp6v1g2	Fgf10	Il15	Adrb1	Pf4	Prkab2	Rbpj	Tab3	Tlr9	Bmp6	Pik3cb	Calm2	Hs1bp3	Adamts6	Ahcyl2	Rgs10	Cdk6	Nrp1	Stat4	Tle4
	E2f3	Pold3	Pcna-ps2	Polr1d	Mphosph6	Snrpe	Wdr3	mt-Tm	Psmc2	Diablo	Ap2a2	Ctsd	Cldn16	Wfs1	Hk2	Dlst	Ndufs7	Acsl5	Mthfd2	Scd2	Cmas	Il1b	Atp6v1g1	Fgf16	Il17d	Adrb2	Cxcl14	Prkag1	Rbpjl	Map2k4	Rac1	Bmp7	Pik3cg	Calm3	Ikzf1	Ahcyl2	Phc3	Il7r	Nop58	Ikbke	H2-DMa	Ypel3
	E2f4	Pold4	Pcna	Polr1c	Dis3l	Snrpf	Utp6	mt-Tf	Psmc1	Bax	Ap2a1	Ctse	Cldn1	Srprb	Ldha	Dld	Ndufs8	Acsl4	Mthfd2l	Scd4	Cmah	Tlr2	Atp6v1g3	Fgf17	Il19	Adrb3	Xcl1	Prkag3	Hes1	Map2k7	Pik3ca	Bmp8b	Pik3cd	Card11	Il7r	Ahnak	Agpat3	Cdc25b	Xbp1	Il17ra	Eomes	Ifit3
	E2f5	Pole	Polr2i	Polr3c	Papd7	Gm13092	Pwp2	mt-Tp	Psmc5	Bik	Ap2b1	Ctsf	Cldn2	Dnajb9	Ext1	Suclg1	Ndufv1	Acsl3	Shmt1	Pmvk	Cyb5r1	Il1r1	Atp6v1h	Fgf18	Il20	Drd1	Cx3cl1	Prkag2	Hes5	Mapk8	Pik3cd	Bmp8a	Pdpk1	Cbl	Itpkb	Ahr	Wdr82	AC034099.1	Tuba4a	Tmem123	Il1rn	Cd160
	Tfdp1	Pole2	Supt4a	Polr3d	Papd5	Snrpg	Mphosph10	mt-Ts2	Psmc6	Il1a	Ap2m1	Ctsg	Cldn3	Tspyl2	Gusb	Suclg2	Ndufv2	1700061G19Rik	Shmt2	Mvk	Cyb5r3	Cd69	Lamtor1	Fgf20	Il21	Drd5	Ccl1	Nlk	Ptcra	Mapk9	Pik3cb	Gdf5	Akt1	Cblb	Jag2	Airn	Mtmr3	Add3	Ifi35	Gnai3	Spsb1	Acss1
	Tfdp2	Pole3	Polr3c	Polr3e	Zcchc7	Snrnp70	Imp3	mt-Ts1	Psmc3	Bid	Ap2s1	Ctsh	Cldn4	Nfya	Pfkfb1	Sucla2	Ndufv3	Acsbg1	Mthfr	Lpl	Cyb5r2	Icam1	Lamtor2	Fgf22	Il22	Hrh2	Ccl2	Skp2	Dvl3	Mapk10	Pik3r2	Gdf6	Akt2	Cd2	Kdelr1	Alcam	Rgs1	Mxd4	Tasp1	Usp4	Sema4b	Sell
	Gsk3b	Pole4	Gtf2b	Polr3k	Skiv2l2	Snrpa	Imp4	mt-Tt	Psmc4	Cdkn1a	Ehd2	Ctsj	Cldn5	Calr	Pgam1	Sdha	Ndufa1	Acadl	Dmgdh	Sc5d	Cyb5rl	Ccrl2	Lamtor3	Fgf6	Il23a	Htr4	Ccl12	Mdm2	Dvl1	Jun	Pik3r1	Gdf7	Akt3	Cd247	Kit	Anxa4	Cdk6	Pik3ip1	Klf6	Nckap1l	Fam155a	Drc1
	Tgfb1	Mcm2	Polr1d	Polr3h	Skiv2l	Snrpc	Tcof1	mt-Tw	Psme1	Gadd45a	Tgfbr1	Ctsk	Cldn11	Khsrp	Pygb	Sdhb	Ndufa2	Acadm	Sardh	Fads2	Cyb5r4	Aqp9	Lamtor4	Fgf15	Il24	Htr5a	Ccl3	Setd7	Dvl2	Fos	Pik3r3	Amh	Rps6kb1	Cd28	Lck	Arhgap20	Nop58	Madd	C1qbp	Dhx15	Dusp10	Speer1
	Tgfb2	Mcm3	Ncbp2	Polr3g	Ttc37	Prpf40b	Fbl	mt-Ty	Psme2	Ddit3	Tgfbr2	Ctsl	Cldn17	Dnajc3	Ak4	Sdhc	Ndufa3	Acadvl	Tyms	Hmgcr	Hk2	Ereg	Lamtor5	Fgf21	Ifna1	Htr5b	Ccl4	Crebbp	Numb	Itch	Akt1	Ltbp1	Gsk3a	Cd3d	Lep	Arhgef12	Rnf213	Klf3	Cndp2	Glyr1	Ak2	Emb
	Tgfb3	Mcm4	Nelfe	Polr3gl	Wdr61	Prpf40a	Fbll1	mt-Tv	Psme2b	Cdkn1b	Zfyve16	Ctsm	Cldn19	Exosc2	P4ha1	Sdhd	Ndufa4	Acaa1a	Mthfsl	Hsd17b7	Hk3	C3ar1	Flcn	Fgf23	Ifna2	Htr6	Ccl5	Ep300	Numbl	Cflar	Akt2	Tgfb1	Gsk3b	Cd3e	Lepr	Armcx4	Xbp1	Fam105a	Sec24a	Mcm4	Fam19a3	Fam161b
	Smad2	Mcm5	Gtf2f1	Polr3f	Cnot6	Rbm25	Nop56	Ears2	Psme3	Tnf	Zfyve9	Ctso	Cldn7	Nop14	Pmm2	Fh1	Ndufa4l2	Acox1	Mthfs	Srebf2	Hk1	Gna15	Fnip1	Klk1b4	Ifna4	Htr7	Ccl6	Sirt1	Dtx1	Map2k3	Akt3	Tgfb2	Foxo1	Cd3g	Lfng	Arrdc4	Tuba4a	Rasgrp2	Cst7	Ip6k1	Egr2	Mgarp
	Smad3	Mcm6	Ercc5	Polr1b	Cnot6l	Ddx5	Nop58	Eprs	Psme4	Gsn	Pml	Ctss	Cldn6	Atf6	Fam162a	Mdh1	Ndufa5	Hadh		Pcyt2	Hkdc1	Cmklr1	Fnip2	Ngf	Ifna5	Gnas	Ccl7	Usp7	Dtx4	Map2k6	Tollip	Tgfb3	Foxo3	Cd4	Nfatc3	Atp6v0a1	Sh3bp5	A430078G23Rik	Nhp2	Hsdl1	Timd2	Sh2d1b1
	Smad4	Mcm7	Lig1	Polr1a	Cnot1	Tcerg1	Snu13	Qrsl1	Psma6	Tnfsf10	Smad2	Ctsw	Cldn8	Hyou1	Sdc1	Mdh2	Ndufa6	Hadhb		Acss2	Amdhd2	Ptger4	Rraga	Bdnf	Ifna6	Gnal	Ccl8	Slc2a4	Dtx3l	Mapk14	Myd88	Inhba	Bad	Cd5	Nhej1	Atpif1	Arid5a	Trim59	Adam19	Poldip3	Swap70	Gng2
	Myc	Rpa2	Ercc1	Znrd1	Cnot2	Snrpa1	Dkc1	Gatb	Psma2	Casp6	Smad3	Ctsz	Cldn14	Rrp9	Egln3	Pcx	Ndufa7	Acaa1b		Atf3	Gnpnat1	Lif	Rragb	Ntf3	Ifna7	Adcy1	Ccl9	Mapk8	Dtx2	Mapk11	Tirap	Inhbb	Irs1	Cd6	Patz1	AW112010	Itih5	Ldlrap1	Znrf3	Pecam1	Casp6	Cast
	Zbtb17	Rpa3	Ercc4	Polr1e	Cnot3	Snrpb2	Nhp2	Gatc	Psma4	Sqstm1	Tfrc	Napsa	Cldn18	Nop56	Pcx	Pck1	Ndufa8	Acaa2		Adh4	Gnpda1	Il15	Rragd	Ntf5	Ifna9	Adcy2	Ccl11	Mapk9	Dtx3	Mapk12	Fadd	Inhbc	Irs2	Cd8a	Pknox1	Bcl2l1	Mapkapk3	Rab3ip	Gm16008	Galnt6	Cxcl9	Speer3
	Cdkn2a	Rfc1	Pold4	Twistnb	Cnot4	Sf3a1	Gar1	Qars	Psma7	Fasl	Egfr	Lgmn	Cldn9	Cxxc1	B4galt7	Pck2	Ndufa9	Ehhadh		Ethe1	Gnpda2	Nampt	Rragc	Ins2	Ifna11	Adcy3	Ccl17	Mapk10	Adam17	Mapk13	Casp8	Inhbe	Grb2	Cdc42	Ppp3cb	Bhlhe40	Wdr43	Trp53inp1	Dusp1	Dcaf8	Ube2l6	Stk17b
	Cdkn2b	Rfc4	Nelfb		Cnot7	Sf3a2	Nop10	Aars	Psma8	Egr3	Pdgfra	Tpp1	Cldn13	Igfbp1	Fbp2	Pdha1	Ndufa10	Acox3		Ech1	Gfpt1	Oprk1	Sesn2	Ins1	Ifna12	Adcy4	Ccl19	Stk4	Psen1	Cebpb	Irak4	Nodal	Shc1	Cdk4	Prex1	Bid	Lgals3bp	Pdcd1	Ppan	Cdc23	Scd1	Ramp1
	Cdkn2c	Rfc2	Rfc2		Cnot8	Sf3a3	Fcf1	Aars2	Psma5	Cd44	Fgfr2	Gla	Cldn10	Cnot4	Igfbp3	Pdha2	Ndufab1	Echs1		Cbs	Gfpt2	Itgb8	Gatsl3	Igf1	Ifna13	Adcy7	Ccl19-ps3	Igf1	Psen2	Map3k5	Irak1	Bmpr2	Sos1	Chuk	Prr7	Bmpr2	Aldh18a1	Arl5c	Dph5	Wdr6	Plekhf1	Emp1
	Cdkn2d	Rfc5	Ell		Cnot9	Sf3b1	Utp14a	Dars	Psma1	Fas	Fgfr3	Glb1	Cldn15	Dcp2	Chpf	Pdhb	Gm4943	Tecr		Gusb	Uxs1	Ptafr	Gatsl2	Igf2	Ifna14	Adcy8	Ccl20	Igf1r	Psenen	Map3k14	Traf6	Amhr2	Sos2	Cish	Ptpn2	Camk2b	Socs3	Dtx1	Socs1	Stat5a	Pim3	Amica1
	Cdkn1b	Rfc3	Taf10		Cnot10	Sf3b2	Utp14b	Dars2	Psma3	Il18	Fgfr4	Gaa	Cldn23	Pdia6	B3gat3	Dlat	Ndufa11	Elovl3		Fasn	Gck	Adm	Mios	Pdgfa	Ifnab	Adcy9	Gm21541	Ins2	Ncstn	Ikbkg	Tab1	Tgfbr2	Hras	Creb1	Ptpn22	Camk2n1	Cndp2	Cenpa	Tmed5	Plekha2	H2-DMb2	1110059G02Rik
	Cdkn1c	Rnaseh2a	Rrm2b		Dhx36	Sf3b3	Drosha	Nars	Psmb6	Igfbp6	Igf1r	Gba	Cldn20	Atp6v0d1	Chst12		Ndufa12	Elovl6		Lgals3	Gpi1	Plaur	Seh1l	Pdgfb	Ifna15	Prkaca	Gm13304	Ins1	Aph1a	Ikbkb	Tab2	Acvr2b	Kras	Crebbp	Ptprc	Capg	Il10ra	Tbxa2r	Kti12	Add3	Stra6	Ltf
	Cdkn1a	Rnaseh2b	Supt5		Parn	Sf3b4	Emg1	Nars2	Psmb7	Prf1	Cbl	Idua	Cldn22	Preb	Hs2st1		Ndufa13	Hacd1		Atf5	Pgm2	Nfkb1	Wdr24	Pdgfc	Ifnb1	Prkacb	Gm10591	Insr	Aph1c	Chuk	Map3k7	Acvr2a	Nras	Crk	Rag2	Capn3	Nolc1	Pde4b	Tmem109	Kat7	Mmp13	Lpar6
	Ccne1	Rnaseh2c	Rpa3		Pnldc1	Sf3b5	Bms1	Gars	Psmb3	Ccnd1	Cblb	Naga	Cldn24	Sec31a	Mpi		Ndufb2	Elovl1		Anxa5	Pgm1	Inhba	Wdr59	Pdgfd	Ifng	Pln	Ccl21b	Irs1	Aph1b	Nfkbia	Ikbkg	Bmpr1a	Raf1	Crkl	Rhoh	Car12	Ppa1	Capn3	Socs2	Pygb	Lif	Foxp3
	Ccne2		Snapc5		Btg1	Sf3b6	Nat10	Tars	Psmb2	Btg3	Cblc	Naglu	Ocln	Gosr2	Gnpda1		Ndufb3	Elovl2		Trp53inp1	Ugp2	Osm	Sec13	Csf1	Ifne	Atp2a1	Ccl21b	Irs2	Maml1	Rela	Chuk	Bmpr1b	Braf	Csk	Runx2	Casp7	P2ry10	Cdkn1b	Trat1	Ssr3	Atf5	Fam20a
	Cdk2		Ssrp1		Btg2	Phf5a	Rcl1	Tarsl2	Psmb5	F2r	Sh3kbp1	Galc	Esam	Serp1	Akr1a1		Ndufb4	Hsd17b12		Chka	Ugdh	Tnfsf10	Depdc5	Kitl	Ifnk	Atp2a2	Ccl21a	Irs3	Maml3	Nfkb1	Ikbkb	Acvr1	Araf	Ctla4	Sox4	Ccr6	Adam19	Sesn3	Pim1	Tbc1d14	Havcr2	Fermt1
	Skp1a		Rfc3		Btg3	Ddx42	Pop1	Tars2	Psmb1	Satb1	Sh3gl3	Gusb	Vcam1	Nfyb	Ppfia4		Gm3244	Hacd3		Gstm7	Galk1	Tnfsf15	Nprl2	Flt3l	Ifnl2	Atp2a3	Ccl22	Irs4	Maml2	Map3k8	Nfkbia	Tgfbr1	Map2k1	Cul1	Sp3	Ccrl2	Nop2	Scml4	Ruvbl1	Spata13	Prps1	Ap1m2
	Cul1		Rpa2		Btg1-ps2	U2af1	Rpp38	Sars2	Psmb4	Bnip3l	Sh3gl2	Hexa	Ezr	Nhp2	B3gat1		Ndufb5	Hacd4		Acat3	Galt	Ifngr2	Nprl3	Vegfa	Ifnl3	Stim1	Ccl24	Pik3ca	Crebbp	Map2k1	Nfkb1	Acvr1b	Map2k2	Cyld	Tbx21	Cd200	Gpr146	Rfx1	Mri1	Dnmt1	Csrnp1	Arhgef18
	Rbx1		Eloa		Tob1	U2af1l4	Pop4	Sars	Psmb9	Tnfrsf12a	Sh3gl1	Hexb	Msn	Dctn1	Chpf2		Ndufb6	Elovl5		Acat2	Gale	Adgre1	Skp2	Vegfb	Osm	Stim2	Ccl25	Pik3cd	Ep300	Mapk1	Rela	Acvr1c	Mapk1	Def6	Tgfb1	Cd38	Nfkbiz	Ctdsp2	Gm17041	Hsph1	Gprasp2	Arhgef3
	Skp2		Taf12		Btg1-ps1	U2af2	Pop5	Pstk	Psmb10	Crebbp	Sh3glb1	Manba	Actb	Slc7a5	G6pdx		Ndufb7	Hacd2		Avpr1a	Pmm2	Il12b	Rnf152	Pgf	Lif	Orai1	Ccl26	Pik3cb	Kat2a	Mapk3	Map3k8	Bambi	Mapk3	Dennd1b	Vav1	Cd81	Tsr1	Gramd3	Nob1	Ptk2b	Satb1	Arhgef11
	Ccna2		Nelfcd		Btg4	Puf60	Rpp25	Sepsecs	Psmb8	Rhob	Sh3glb2	Man2b1	Actg1	Ssr1	G6pd2		Ndufb8	Elovl7		1700057G04Rik	Pmm1	Csf1	Rptor	Vegfc	Tslp	Orai2	Ccl27a	Pik3r2	Kat2b	Rps6ka5	Map2k1	Smad1		Deptor	Wwp1	Cd83	Ppan	Fam46c	Apex1	Mical1	Lilrb4a	B3gnt5
	Ccna1		Taf13		Tob2	Smndc1	Rpp25l	Cars	Psmb11	Gpx3	Amph	Neu1	Pik3ca	Edem1	Mdh2		Ndufb9	Elovl4		Clu	Gmppb	Cxcl5	Akt1s1	Vegfd	Ctf1	Orai3	Ccl27b	Pik3r1	Snw1	Rps6ka4	Map2k2	Smad5		Dgka	Cd3g	Cd86	Noc4l	Cpm	Rrp9	Trim35	Sepn1	Il7r
	Cdc6		Taf6		Pabpc1	Rbm17	Pop7	Cars2	Ifng	Pdgfrb	Bin1	Arsa	Pik3cd	Edc4	Pgls		Ndufb10	Acaa1a		Errfi1	Gmppa	Tnfrsf9	Mtor	Hgf	Csf2	Cacna1c	Gm20878	Pik3r3	Ctbp1	Creb1	Mapk1	Smad9		Dgkz	Cd3d	Cdcp1	Bysl	Irak2	Hipk2	Arhgap27	Rpl18a	Fam129b
	Cdc45		Taf9		Pabpc5	Cherp	Rpp30	Mars	Psmf1	Tspo	Epn1	Arsb	Pik3cb	Eif2ak3	Pgam2		Ndufb11	Acox1		Trib3	Gmds	Lyn	Deptor	Angpt1	Cntf	Cacna1d	Gm13306	Pdpk1	Ctbp2	Creb3	Mapk3	Smad2		Dlg1	Cd3e	Cdk6	Socs1	Tnfaip8l1	Lta	Gtf3c2	Clcn3	Rassf4
	Cdc7		Ak6		Pabpc4	U2surp	Rpp40	Mars2	Pomp	Ccnd2	Epn2	Arsg	Pik3r2	Mthfd2	Chst1		Ndufc1	Hsd17b4		Cxcl16	Mpi	Acvr2a	Mlst8	Angpt2	Csf3	Cacna1f	Gm21586	Chuk	Ncor2	Creb3l1	Map2k3	Smad3		Dock2	Cd1d1	Cerk	Nifk	Slc43a2	Fam118b	Srebf1	Marcksl1	Sytl2
	Dbf4		Gtf2a2		Pabpc1l	Rp9	Rexo1	Mtfmt		Timp1	Epn3	Galns	Pik3r1	Srpr	Gpc1		Ndufc2	Scp2		Tnfrsf12a	Fuk	Ldlr	Telo2	Angpt4	Epo	Cacna1s	Gm21953	Ikbkb	Cir1	Creb3l2	Map2k6	Smad4		Dok1	Itk	Chchd10	Ptger4	E2f2	Tmem55b	Hjurp	Tube1	S100a8
	Cdk1		Vps37d		Pabpc1l2b-ps	Lsm2	Rexo5	Vars		Ctnnb1	Eps15	Gns	Pik3r3	Nolc1	Tsta3		Sdha	Acaa1b		Actg1	Fpgt	Bdkrb1	Tti1	Efna1	Gh	Cacna1a	Ccl28	Pten	Hdac2	Creb3l3	Map2k4	Smad6		Dok2	Txk	Cish	Rcl1	Evl	Nop16	Vps35	1190005I06Rik	Gpr34
	Ccnb1		Nme1		Pabpc6	Lsm3	Rexo2	Vars2		Irf1	Eps15l1	Ids	Rac1	Ern1	Alg1		Sdhb	Acox3		Jag1	Tsta3	Hrh1	Clip1	Efna2	Lep	Cacna1b	Cxcr2	Akt1	Hdac1	Creb3l4	Map2k7	Smad7		Dusp22	Zbtb7b	Coro2a	Socs2	Cd7	Rab5c	Gpbp1	Srgn	Klf2
	Ccnb2		Rnmt		Pabpc4l	Lsm4	Xrn1	Lars2		Hspb1	Spg20	Sgsh	Cybb	Fkbp14	Gfpt1		Sdhc			Lgmn		F3	Grb10	Efna4	Thpo	Cacna1e	Cxcr1	Akt2		Atf2	Mapk14	Smurf2		Dusp3	Clec4d	Cpe	Iars	Pou2f2	Emc6	Bap1	Mettl22	Ifit2
	Ccnb3		Ercc2		Pabpc2	Lsm5	Xrn2	Lars		Add1	Ubb	Lipa	Cyba	Zbtb17	Prps1l3		Sdhd			Fbxo6		Bst2	Ulk1	Efna5	Prl	Cacna1g	Cxcr3	Akt3		Atf4	Mapk11	Smurf1		Elk1	Clec4e	Csrp2	Gm17041	Arhgef18	Serpina3g	Calu	Zfp280b	Rasa3
	Cdc25b		Pole4		Pan2	Lsm6	Gtpbp4	Iars		Timp2	Nedd4	Pla2g15	Ncf2	Wipi1	Got1		Uqcrfs1			Gpx8		Ptgir	Ulk2	Efna3	Egf	Cacna1h	Cxcr4	Sgk1		Creb5	Mapk12	Zfyve16		Eomes	Fcer1g	Cst7	Nabp1	Cxcr5	Gnl3	Serinc1	Coq2	Sesn1
	Cdc25c		Vps37b		Pan3	Lsm7	Gnl2	Iars2		Btg2	Nedd4l	Dnase2a	Ncf1	Yif1a	Mdh1		mt-Cytb			Pnrc1		Cd55b	Eif4ebp1	Egfr	Pdgfa	Cacna1i	Cxcr5	Sgk2		Atf6b	Mapk13	Zfyve9		Ets1	Sema4a	Ctla4	Rcan3	St3gal1	Nkg7	Unc119b	Slc39a6	Suox
	Ywhaz		Nt5c3		Dcp1a	Lsm8	Gnl3	Kars		Timp3	Mdm2	Dnase2b	Ncf4	Ccl2	Slc35a3		Cyc1			Antxr2		Cd55	Eif4e	Erbb2	Pdgfb	Chrna7	Cxcr6	Sgk3		Ripk3	Mapk8	Id1		Evl	Il4	Cttn	Apex1	Sdc4	Polr2h	Ppp2r1b	Ubl3	Scin
	Ywhab		Snapc4		Dcp1b	Prpf3	Gnl3l	Rars		Lef1	Traf6	Acp2	Ctnnb1	Dkc1	Galk1		Uqcrc1			Mal2		Calcrl	Eif4e2	Erbb3	Il2ra	P2rx1	Xcr1	Foxo1		Mlkl	Mapk9	Id2		Fos	Mtor	Cyfip1	Rrp9	Rln3	Rrp1b	Cpt1a	Cldn4	Tbl1xr1
	Ywhaq		Aaas		Dcp2	Prpf4	Nvl	Rars2		Casp1	Rnf41	Acp5	Ctnnd1	Eif4ebp1	Egfr		Uqcrc2			Cd9		Csf3	Eif4e1b	Erbb4	Il2rb	P2rx2	Cx3cr1	Foxo3		Pgam5	Mapk10	Id3		Foxo1	Spn	Cyth3	Polr3e	Ssbp3	Aimp2	Ifi206	Slc15a3	Rcsd1
	Ywhae		Znrd1		Ddx6	Ppih	Mdn1	Pars2		Gpx1	Itch	Smpd1	Ctnna2	Eif4a1	Angptl4		Uqcrh			Pparg		Il4ra	Rps6kb2	Fgfr1	Il2rg	P2rx3	Ccr8	Foxo4		Dnm1l	Jun	Id4		Foxo3	Stat6	D630039A03Rik	Lta	Rarg	F730043M19Rik	Stag2	Lilr4b	Adh1
	Ywhah		Rfc4		Edc3	Prpf31	Rbm28	Hars		Bcl10	Smurf2	Asah1	Ctnna3	Eif2s1	Cited2		Uqcrb			Gldc		Nlrp3	Rps6kb1	Fgfr2	Il3ra	P2rx4	Ccr6	Foxo6		Fadd	Fos	Rbl1		Foxp3	Gpr18	Dapp1	Fam118b	AC121801.1	Ccr6	Dck	Chac1	Nrep
	Ywhag		Itpa		Edc4	Snu13	Nob1	Hars2		Igf2r	Smurf1	Aga	Ctnna1	Tatdn2	Plod2		Uqcrq			Stx5a		Il15ra	Eif4b	Fgfr3	Il4ra	P2rx5	Ccr9	Grm1		Casp8	Tnf	E2f4		Fyb	Eomes	Ddc	Zscan29	Rgs3	Eef1e1	Trim59	Nt5c2	Oxr1
	Plk1		Pom121		Patl1	Snrnp27	Ran	Fars2		Cdc25b	Wwp1	Psap	Ptpn11	Xpot	Qsox1		Uqcr10			Stard4		Adora2b	Rps6	Fgfr4	Il5ra	P2rx7	Ccr4	Homer2		Casp7	Il1b	E2f5		Fyn	Ifng	Dennd5a	Isg20	Gm45606	Abhd11	Swap70	Serpina3f	Paqr7
	Wee1		Brf2		Xrn1	Usp39	Rasl2-9	Farsa		Aifm3	Ldlr	Psapl1	Mmp2	Lsm4	Me2		Uqcr11			Ctnnb1		Gch1	Strada	Ngfr	Il6ra	P2rx6	Ccr7	Homer1		Casp3	Il6	Tfdp1		Gab2	Ccr9	Dnah12	Pwp2	Adrb2	Chchd4	Aplp2	Csf2	Ccr5
	Wee2		Rfc5		Xrn2	Sart1	1700009N14Rik	Farsb		Cd38	Ldlrap1	Gm2a	Mmp9	Chac1	Spag4		Cox10			Tmem97		Olr1	Stradb	Ntrk1	Il7r	Grin1	Ccr2	Homer3		Ccl2	Il12a	Crebbp		Gata3	Foxn1	Dst	Nampt	Gsta4	Cd3eap	Hk1	Rai14	9930111J21Rik2
	Pkmyt1		Sac3d1		Nudt16	Zmat2	Xpo1	Yars		Ppp3r1	Dab2	Ppt1	Mapk14	Stc2	P4ha2		mt-Co3			Fam129a		Ptger2	Stk11	Ntrk2	Il9r	Grin2a	Ccr5	Agap2		Ccl12	Il12b	Ep300		Grap	Il7	Dusp4	Nop16	St8sia6	Grwd1	Tom1l2	Bcl2l1	Igfbp4
	Ccnh		Clp1		1700080E11Rik	Prpf38a	Nmd3	Yars2		Hgf	Ccr5	Ppt2	Mapk11	Pdia5	Gapdhs		mt-Co1			Pdk3		Csf3r	Cab39	Insr	Il10ra	Grin2c	Ccr1	Csnk1e		Ccl5	Ccl5	Sp1		Grap2	Prkdc	Dynlt3	Atad3a	Ddit4	Mgat4a	Vps41	Jund	Oaz3
	Cdk7		Nme4		Lsm1	Prpf38b	Nxf1	Wars		Clu	Cxcr1	Lamp1	Mapk12	Nabp1	Eno2		mt-Co2			Plaur		Myc	Cab39l	Igf1r	Il10rb	Grin2d	Ccr1l1	Il6		Ccl20	Ccl3	Tgif1		Grb2	Trp53	E130308A19Rik	Ltv1	Bcl9l	Lrrc8d	Rassf2	Pkib	Rhoj
	Anapc1		Prim1		Lsm2	Eftud2	Nxf7	Wars2		Atf3	Cxcr2	Lamp2	Mapk13	Lsm1	Got2		Cox4i1			Sema3b		Bmyc	Prkaa1	Pdgfra	Il11ra1	Ryr1	Ccr3	Il10		Cxcl1	Ccl4	Tgif2		Gsk3a	Foxp3	E2f3	Polr1b	Ccr9	Pim3	Kctd20	Enc1	4930486L24Rik
	Anapc2		Tsg101		Lsm3	Snrnp200	Nxf2			Lgals3	Cxcr4	Lamp3	Icam1	Sdad1	Ext2		Cox4i2			Gnai1		Rela	Prkaa2	Pdgfrb	Il11ra2	Ryr2	Ccr10	Stat3		Cxcl2	Ticam2	Myc		Gsk3b	Fut7	Ebi3	Ezh2	Sbk1	Slc7a1	Ccpg1	Slc1a2	Plekhd1
	Cdc27		Usp11		Lsm4	Prpf6	Nxf3			Lum	Grk1	Cd68	Plcg1	Eif4a2	Slc25a13		Cox5a			Abca2		Tnfaip6	Tsc1	Csf1r	Gm13305	Ryr3	Jak2	Egf		Cxcl3	Ticam1	Cdkn2b		Hras	Ncor1	Ecm1	Smyd5	Insr	Larp1	Mtmr12	Wdr59	Agap1
	Anapc4		Taf1c		Lsm5	Prpf8	Nxt1			Lmna	Grk2	Cd63	Plcg2	Eif4e	Hmmr		Cox5b			Atxn2		Il7r	Tsc2	Kit	Il11ra2	Cysltr1	Jak3	Egfr		Cxcl10	Ripk1	Pitx2		Icos	Pla2g2d	Eea1	Srr	Gm14085	Suco	Orai2	Agpat3	Camk2n1
	Anapc5		Tarbp2		Lsm6	Snrnp40	Nxt2			Gadd45b	Grk3	Scarb2	Prkca	Iars	Pdk3		Cox6a1			Nfil3		Il18	Tbc1d7	Flt3	Il12rb1	Cysltr2	Stat1	Grb2		Cx3cl1	Irf5	Rbx1		Ikbkb	Rhoa	Eef1akmt1	Slc14a1	Bcl6	Tbc1d13	Tmem71	Il2	Acsl6
	Cdc16		Polh		Lsm7	Ddx23	Eif6			Cdk2	Grk4	Npc1	Prkcb	Ddx10	Cxcr4		Cox6a2			Alcam		Gabbr1	Rheb	Flt1	Il12rb2	Chrm2	Stat2	Sos1		Csf1	Irf7	Cul1		Ikbkg	5830411N06Rik	Eef2k	Irf4	Klhl3	Tex30	Gm29609	Cd28	Txnip
	Anapc7		Cetn2		Lsm8	Gm16286	Sbds			Ifnb1	Grk5	Npc2	Prkcg	Gemin4	Gpc4		Cox6b1			Fabp5		Cd82	Ddit4	Flt4	Il13ra1	Adra1a	Stat3	Sos2		Csf2	Spp1	Skp1a		Inpp5d	Flt3	Egr2	Tmem185b	Cd72	Epcam	Slc2a3	Cd52	Grifin
	Cdc23		Pold1		Eno1	Prpf19	Efl1			Retsat	Grk6	Ctns	Ptk2	Tars	Ecd		Cox6b2			S100a11		Tnfsf9	Wnt1	Kdr	Il13ra2	Adra1b	Stat5b	Hras		Fas	Ikbke	Mapk1		Irf4	Il2rg	Endod1	Nol8	Zfp467	Osm	Capn7	Fam20b	Iffo1
	Anapc10		Cant1		Eno2	Cdc5l	Lsg1			Smad7	Arrb1	Slc17a5	Pxn	Aldh18a1	Gne		Cox6c			Cpeb2		Nmur1	Wnt2	Met	Il15ra	Adra1d	Gnai1	Kras		Il18r1	Tbk1	Mapk3		Itk	Adam17	Eno2	Gbp6	Pdk2	Gpatch4	Naa40	Bcl2
	Anapc11		Pde4b		Eno3	Bcas2	Spata5			Sod1	Arrb2	Slc11a1	Bcar1	Ddit4	B4galt2		Cox7a2					Il2rb	Wnt2b	Tek	Il20ra	Agtr1a	Gnai3	Nras		Jag1	Traf3	Ifng		Itpr1	Apc	Eno3	Snhg4	Cd55	Ydjc	Slc28a2	Slc4a7
	Cdc26		Dgcr8		Eno1b	Plrg1	Ak6			Ptk2	Was	Slc11a2	Thy1	Hspa9	Fut8		Cox7a1					Tlr1	Wnt3	Epha2	Il20rb	Agtr1b	Gnai2	Braf		Il1b	Irf3	Tnf		Jun	B2m	Entpd1	Gnl3	Rasal1	Tnf	Pip4k2c	H2-T23
	Anapc13		Rad51		Eno4	Cwc15	Riok1			Eno2	Wasl	Laptm4b	Arhgap35	Sec11a	Miox		Cox7a2l					Lpar1	Wnt3a	Grb2	Il21r	Ednra	Adcy1	Raf1		Il6	Cd40	Rhoa		Kcnn4	Bcl11b	Ephx1	Wdr4	Klc4	A730015C16Rik	Rnf2	N4bp1
	Cdc20		Surf1		Pnpt1	Ctnnbl1	mt-Rnr1			Hmox1	Arpc1b	Laptm4a	Arhgap5	Gm8994	Vcan		Cox7b					Irak2	Wnt4	Sos1	Il22ra1	Ednrb	Adcy2	Araf		Il15	Cd80	4930544G11Rik		Kras	Cdk6	Ergic1	Rrs1	St8sia1	Ece2	Adam17	Glipr2
	Pttg1		Pnp2		Pfkl	Hspa8	mt-Rnr2			Ier3	Arpc1a	Laptm5	Rhoa	Gm5580	Gpc3		Cox7b2					Ripk2	Wnt5a	Sos2	Il22ra2	F2r	Adcy3	Map2k1		Lif	Cd86	Rock1		Lat	Dnaja3	Etfbkmt	Aen	Mturn	Pim2	Skiv2l2	Map3k8
	Espl1		Pnp		Pfkm	Hspa1l	n-R5s100			Bcl2l10	Arpc2	Abca2	4930544G11Rik	Eif4a3	B3galt6		Cox7c					Mmp14	Wnt5b	Hras	Il23r	Grm1	Adcy4	Map2k2		Lta	Ifna1	Ppp2r1a		Lax1	Fzd5	Evi5	Usp36	Arrdc4	D030028A08Rik	Rnf14	Gal
	Smc1b		Ada		Pfkp	Hspa1a	n-R5s142			Cd2	Arpc3	Abcb9	Rock1	Pop4	Hspa5		Cox8a					P2rx7	Wnt6	Kras	Il27ra	Grm5	Adcy5	Mapk1		Bcl3	Ifna2	Ppp2r1b		Lck	Fzd7	Fabp5	Shmt1	Hist3h2a	Lncpint	Mdm2	Slc2a6
	Smc1a		Nme3		Hspa9	Hspa2	n-R5s144			Gch1	Arpc4	Cd164	Rock2	Ero1l	Me1		Cox8b					Slc11a2	Wnt7a	Nras	Il6st	Grpr	Adcy6	Mapk3		Socs3	Ifna4	Ppp2ca		Lcp2	Fzd8	Fam129a	Rrp1b	C530050E15Rik	Gcsh	Sp3	Fam46c
	Smc3		Gtf3c5		Hspd1	Hspa1b	n-R5s111			Mmp2	Arpc5	Entpd4	Myl2	Cebpg	Adora2b		Cox8c					Sell	Wnt7b	Raf1	Ifnar1	Hrh1	Adcy7	Mapk14		Tnfaip3	Ifna5	Ppp2cb		Lgals3	Gli3	Fam169b	Snhg17	Frat1	Ptpn11	Gm44503	Insm1
	Stag2		Nt5c			Pqbp1	n-R5s128			Vdac2	Arpc5l	Entpd4b	Myl7	Bag3	Ugp2		Cox11					P2ry2	Wnt8a	Map2k1	Ifnar2	Htr2a	Adcy8	Mapk11		Traf1	Ifna6	Rps6kb2		Lime1	Jmjd6	Far1	Aimp2	Fam49a	Gm20425	Dnah14	Zcchc18
	Stag1		Ak1			Wbp11	Gm22109			Tap1	Wipf1	Sort1	Myl9	Kdelr3	Mif		Cox15					Abca1	Wnt8b	Map2k2	Ifngr1	Htr2b	Adcy9	Mapk12		Ifi47	Ifna7	Rps6kb1		Lyn	Lig4	Foxp3	Traf6	Gm42846	Timm10	Cfap43	Lrp8
	Rad21		Gtf2h1			Snw1	n-R5s104			Plat	Wipf2	Cln3	Myl10	Cebpb	Nanp		Cox17					Ffar2	Wnt9a	Mapk1	Ifngr2	Htr2c	Prkaca	Mapk13		Gm5431	Ifna9			Malt1	Mafb	Frmd4b	F730043M19Rik	Ahdc1	Gm11626	Zfp512	P2ry1
	Ttk		Hcls1			Xab2	n-R5s141			Ifngr1	Wipf3	Cln5	Myl12b	Cnot2	Zfp292		Atp5a1					Prok2	Wnt9b	Mapk3	Ifnlr1	Lhcgr	Prkacb	Cdk2		Junb	Ifna11			Map2k1	Mpzl2	Frmd6	Mrto4	Prrt2	Nit2	Ehd3	Irf4
	Bub1		Aprt			Syf2	Gm26391			App	Hspa8	Mfsd8	Myl12a	Shc1	Stc2		Atp5b					Gnai3	Wnt10b	Irs1	Osmr	Ntsr1	Lyn	Prmt1		Mmp3	Ifna12			Map2k2	Ncaph2	Gabarapl1	Eef1e1	Dyrk1b	Zfp637	Birc2	H2-DMb1
	Bub3		Ercc8			Crnkl1	n-R5s139			Brca1	Hspa1l	Hgsnat	Mylpf	Arxes2	Tpst1		Atp5c1					Tacr1	Wnt10a	Tlr2	Lifr	Oxtr	Gm11787	Foxg1		Mmp9	Ifna13			Map2k4	Nkap	Gadd45g	Ctps	Pex11g	Gadd45g	Tmem164	Slco3a1
	Bub1b		Impdh2			Isy1	Rn5s			Rock1	Hspa1a	Sumf1	Afdn	Arxes1	Pgm1		Atp5d					Slc7a1	Wnt11	Tlr4	Crlf2	Avpr1a	Hck	Ccnb1		Mmp14	Ifna14			Map2k7	Rag1	Galm	Pprc1	Tdrp	Il15ra	Cpm	Adora2b
	Mad1l1		Polb			Ppil1	n-R5s146			Psen1	Hspa2	Gnptab	Rap1a	H2afx	Gys1		Atp5e					Cdkn1a	Wnt16	Rac1	Cntfr	Avpr1b	Fgr	Ccnb2		Edn1	Ifnab			Map3k1	Ripk3	Gata1	Spata5	Sorbs1	Id2	Cstf2t	Batf
	Mad2l1		Sdcbp			Ppie	n-R5s108			Dcn	Hspa1b	Gnptg	Rap1b	Slc1a4	Tktl1		Atp5o					Cybb	Fzd1	Syk	Csf2ra	Ltb4r2	Src	Ccnb3		Nod2	Ifna15			Map3k14	Rorc	Gbp2b	Dcun1d2	Lmna	Tmem91	Rnf40	Prkag2
	Mad2l2		Sf3a3			Ccdc12	n-R5s149			Psen2	Dnajc6	Nagpa	Sipa1	Rps14	Tgfa		mt-Atp6					Timp1	Fzd7	Cd19	Csf2rb2	Ptafr	Shc1	Ccnd1		Icam1	Ifnb1			Map3k7	Rps6	Gbp4	Fam57a	Degs2	Zfp593	Acss1	Cacna2d1
	Fzr1		Dad1			Rbm22	Gm22291			Sod2	Washc4	Igf2r	Vasp	Cnot6	Chst2		Atp5f1					Hbegf	Fzd2	Pik3ap1	Csf2rb	Ptger1	Shc2	Ccnd2		Sele	Ifnar1			Map3k8	Shh	Gbp7	Txnrd1	Tob1	Cd200r1	Slfn8	Pus7l
	Cdc14b		Upf3b			Bud31	Gm25018			Bmf	Washc5	M6pr	Actn4	Cks1brt	Phka2		Atp5g1					Scarf1	Fzd3	Gh	Csf3r	Ptger3	Shc3	Ccng2		Vcam1	Ifnar2			Map4k1	Stat5a	Gem	Cd3eap	Gm26551	Jmjd7	Cul1	Uhrf1bp1l
	Cdc14a		Guk1			Aqr	n-R5s121			Ereg	Washc2	Clta	Actn1	Cks1b	Stmn1		Atp5g2					Ebi3	Fzd4	Prl	Epor	Ptgfr	Shc4	Cdkn2b		Ptgs2	Stat1			Map4k3	Stat5b	Gfi1	Grwd1	Trim17	Nceh1	Cry1	Clic4
	Atr		Trp53			Acin1	n-R5s103			Krt18	Washc1	Cltb	Vcl	Psat1	Gale		Atp5g3					Nfkbia	Fzd5	Osm	Ghr	Bdkrb1	Grb2	Cdkn2d		Tnfrsf1b	Cxcl10			Mapk1	Tcf3	Ggta1	Csrnp1	Ctse	Pno1	Mtmr6	Tmem259
	Atm		Adrm1			Gm8994	n-R5s138			Tgfb2	Washc3	Cltc	Cxcl12	Eif4g1	Met		Atp5h					Sri	Fzd8	Il2	Lepr	Bdkrb2	Sos1	Cdkn1a		Traf3	Cxcl9			Mapk11	Wnt1	Gimap7	Slc7a1	Dhrs3	B3galt6	Lnx2	Cdk6
	Trp53		Gm9774			Eif4a3	n-R5s123			Rela	Capza1	Ap1g1	Cxcr4	Slc30a5	Lct		Atp5k					Slc7a2	Fzd6	Il3	Mpl	Tacr1	Sos2	Cdkn1b		Pik3ca	Cxcl11			Mapk12	Wnt4	Gnaq	Tex2	AC125206.2	Efhd2	Slc25a46	Oit3
	Chek1		Sec61a1			Rbm8a	n-R5s110			Wee1	Capza2	Ap1g2	Gnai1	Skiv2l2	Irs2		Atp5j2					Ccl17	Fzd10	Il6	Prlr	Tacr2	Hras	Rbl2		Pik3cd				Mapk13	Xrcc4	Gphn	Osm	Cd160	E130218I03Rik	Vps33a
	Chek2		Pola2			Magoh	n-R5s133			Rara	Capza3	Ap1b1	Gnai3	Kif5b	Polr3k		Atp5l					Tlr3	Fzd9	Il4	Egfr	Tacr3	Kras	Plk1		Pik3cb				Mapk14	Zbtb1	Gpr15	Tmco3	Gm42722	Qtrt1	Snx14
	Crebbp		Fen1			Magohb	n-R5s113			Cd14	Capzb	Ap1m1	Gnai2	Dcp1a	B4galt1		Atp5j					Aplnr	Lrp5	Il7	Pdgfra	Tbxa2r	Nras	Plk2		Pik3r2				Mapk3	Zfp36l1	Gpr174	Gpatch4	Igsf3	Synpo	Sacm1l
	Ep300		Nudt9			Thoc1	n-R5s105			Cd69	Vps29	Ap1m2	Rapgef3	Imp3	Efna3		mt-Atp8					Osmr	Lrp6	Ifna1	Pdgfrb	Trhr	Raf1	Plk3		Pik3r1				Mapk7	Zfp36l2	Gpr34	Mcub	Lin9	Gm26771	Exoc6
	Prkdc		Pde6g			Thoc2	Gm25212			Pea15a	Vps26a	Ap1s2	Rapgef4	Spcs1	Lhx9		Atp6v1a					Il10ra	Dvl3	Ifna2	Jak1	Trhr2	Braf	Plk4		Pik3r3				Mapk8	Adrm1	Gpr83	Snhg15	Rad51ap1	Ccl5	Golga2
	Mdm2		Tyms			Thoc3	n-R5s143			Dnajc3	Vps26b	Ap1s1	Rassf5	Dnaja4	Kdelr3		Atp6v1b2					Psen1	Dvl1	Ifna4	Jak2	Cckar	Map2k1	Gadd45a		Akt1				Mapk9	Ankle1	Gprasp2	Ift46	Gtf2ird1	Pcsk4	Bms1
	Gadd45a		Bcap31			Alyref	n-R5s124			Casp2	Vps35	Ap1s3	Ptk2b	Vegfa	Taldo1		Atp6v1b1					Gpr183	Dvl2	Ifna5	Jak3	Cckbr	Mapk1	Gadd45b		Akt2				Mapkap1	Clptm1	Grhl1	Pus1	Axin2	Akr1c13	Tnfaip3
	Gadd45b		Ddb1			Alyref2	n-R5s122			Cth	Snx3	Ap3d1	Itk	Ttc37	Dpysl4		Atp6v1c1					Atp2b1	Gsk3b	Ifna6	Tyk2	Cxcr4	Mapk3	Gadd45g		Akt3				Mib2	Lgals9	Gsap	Tnf	Fgf13	Eif2b3	Hmgcr
	Gadd45g		Nfx1			Gm4340	n-R5s134			Plcb2	Snx12	Ap3b1	Txk	Tubb2a	Vldlr		Atp6v1c2					Tnfrsf1b	Tnf	Ifna7	Stat1	Egfr	Pik3ca	Fasl		Dab2ip				Mlst8	Sos1	Gsto1	Pus7	Nol4l	Il18r1	Chst10
	Pcna		Rad52			Ncbp1	n-R5s117			Bmp2	Usp8	Ap3b2	Vav1	Fus	Cd44		Atp6v1d					Best1	Tnfrsf1a	Ifna9	Stat2	Erbb2	Pik3cd	Bcl2l11		Irf1				Mtor	Sos2	Gvin1	Ttc27	Gm42646	Timm9	Eps15
	Sfn		Adcy6			Ncbp2	Gm23284			Hmgb2	Stambp	Ap3m1	Vav2	Exosc10	Agl		Atp6v1e1					Gpc3	Ikbkb	Ifna11	Stat3	Erbb3	Pik3cb	Tnfsf10		Ifnb1				Myc	Zeb1	Gzmb	Gcsh	Dtx4	Tmem251	Lig1
	Cdc25a		Arl6ip1			Hnrnpa1	n-R5s136			Plppr4	Rab7	Ap3m2	Vav3	Eef2	Sox9		Atp6v1e2					Scn1b	Ins2	Ifna12	Stat4	Erbb4	Pik3r2	Bcl6						Nck1	Prdm1	H2-Ob	A830080D01Rik	Gm16152	2700097O09Rik	Sde2
	Orc1		Dguok			Hnrnpa3	Rmrp			H1f0	Hgs	Ap3s2	Rac2	Exoc2	Ddit4		Atp6v1f					Acvr1b	Ins1	Ifna13	Stat5a	Pdgfra	Pik3r1	Bnip3						Nck2	Zfp683	H2-Q1	Timm10	Fam124b	Rnf19b	E2f2
	Orc2		Poll			Hnrnpa1l2-ps2				Tgfbr3	Stam	Ap3s1	Cdc42	Paip1	Idua		Atp6v1g2					Hpn	Igf1	Ifna14	Stat5b	Pdgfrb	Pik3r3	Atg12						Nf1	Bmp4	Hdgfl3	Gbp5	Rflnb	Tsr2	Aco1
	Orc3		Smad5			Hnrnpc				Ebp	Stam2	Ap4e1	Rhoh	Banf1	Casp6		Atp6v1g1					Sema4d	Insr	Ifnab	Stat6	Gnaq	Pik3cg	Gabarapl1						Nfat5	Foxj1	Hipk2	Znhit6	BC106179	Jaml	Cnot7
	Orc4		Mpg			Rbmx				Txnip	Tsg101	Ap4b1			Glce		Atp6v1g3					Klf6	Igf1r	Ifna15	Cish	Gna11	Pik3r5	Gabarap						Nfatc1	Ihh	Hivep3	Gadd45g	Gm9821	Gm37881	Mis12
	Orc5		Dut			Rbmxl1				Ank	Mvb12a	Ap4m1			Copb2		Atp6v1h					Cd48	Grb2	Ifnb1	Socs1	Gna14	Pik3r6	Gabarapl2						Nfatc2	Nfkbid	Hmgn3	Adamtsl4	Dnajc28	Scarb1	Tbk1
	Orc6		Pola1			Rbmxl2				Gm20683	Mvb12b	Ap4s1			Dsc2		Atp6v0a1					Cxcr6	Sos1	Epo	Socs2	Gna15	Prkcz	Cat						Nfatc3	Zc3h8	Hnrnpll	Nr4a3	Chek2	Coq4	Exoc1
	Mcm2		Ago4			Hnrnpk				Rhot2	Vps37d	Gga1			Hs6st2		Atp6v0a2					Slc1a2	Sos2	Csf3	Socs3	Plcd1	Akt1	Sod2						Nfkb1	Zfp608	Homer1	Ifrd2	Map2k6	Gm45343	Sytl2
	Mcm3		Rala			Hnrnpm				Cyld	Vps37b	Gga3			Cdk1		Tcirg1					Gp1ba	Hras	Ghr	Socs4	Plcd3	Akt2	Atm						Nfkbia	Cdkn2a	Icam1	Rrp12	Rnf144a	Gm26885	Klhl25
	Mcm4		Zwint			Hnrnpu				Gm6665	Vps37c	Gga2			Plod1		Atp6v0a4					Tapbp	Kras	Prlr	Socs5	Plcd4	Akt3	Pck1						Nfkbib	Erbb2	Ift80	Map3k8	Rom1	Rpp38	Vwa5a
	Mcm5		Bcam			Pcbp1				Gstm6	Vps37a	Mcoln1			Sdc2		Atp6v0c					Rgs16	Nras	Osmr	Socs7	Plcb1	Foxo3	Pck2						Nfkbie	Tmem131l	Igf1r	Polr3d	Gm44093	Car12	Zfp869
	Mcm6		Tk2			Srsf1				Gstm2	Snf8	Litaf			Gmppb		Atp6v0b					Slamf1	Braf	Il2ra	Socs6	Plcb3	Chuk	G6pc						Nr4a1	Ada	Igf2r	Mettl13	Crip2	Mettl1	Pramef8
	Mcm7		Cstf3			Srsf2				Gsr	Vps36	Hyal1			Paxip1		Atp6v0d1					Lck	Raf1	Il2rb	Bcl2	Plcb4	Ikbkb	G6pc2						Nr4a2	Adam8	Iigp1	B3galt6	Gm16638	Gm42908	Nt5dc1
			Gtf2h5			Srsf3				Bgn	Vps25	Fuca1			Nsdhl		Atp6v0d2					Hif1a	Map2k1	Il2rg	Mcl1	Plcb2	Ikbkg	G6pc3						Nr4a3	Egr3	Ikzf2	Alg3	Tg	Otulin	Rfwd3
			Hprt			Srsf4				Bcl2l1	Chmp6				Rars		Atp6v0e					Ahr	Map2k2	Il3ra	Bcl2l1	Plcg1	Nfkbia	Il7r						Nras	Rasgrp1	Ikzf3	Fabp5	Rasgef1b	Gm28942	Cul2
			Bola2			Srsf5				Gna15	Chmp4c				Slc16a3		Atp6v0e2					Nmi	Mapk1	Il6ra	Pim1	Plcg2	Nfkbib	Klf2						Orai1	Skint1	Ikzf4	Tfrc	Gm11775	Gm44694	Cnst
			Gpx4			Srsf6				Mgmt	Chmp4b				Glrx		Atp6ap1					Rhog	Mapk3	Il4ra	Myc	Plce1	Nfkb1	S1pr1						Pag1	Tespa1	Il1rl1	Hemk1	Hist2h2be	Spry1	Nupl1
			Mpc2			Srsf7				Ppt1	Chmp3				Srd5a3		Atp4a					Tpbg	Rps6ka3	Il7r	Ccnd1	Plcz1	Rela	S1pr4						Pak1	Vnn1	Il2rb	Gm37760	E130215H24Rik	Dnah7a	L1cam
			Cda			Srsf9				F2	Chmp2a				Sdc3		Atp4b					Npffr2	Rps6ka1	Ifnar1	Ccnd2	Itpr1	Bad	Rag1						Pak2	Zfp609	Inpp5f	Plod3	Xylt1	Gm16033	Rab33b
			Alyref			Tra2a				Il6	Chmp2b				Hdlbp		Atp12a					Ifnar1	Rps6ka2	Ifnar2	Ccnd3	Itpr2	Gsk3a	Rag2						Pdcd1	Bmi1	Irf4	Pcsk4	Gm12474	Rsad1	Ggta1
			Mrpl40			Tra2b				Sc5d	Chmp7				Col5a1		Ppa1					Icosl	Rps6ka6	Epor	Cdkn1a	Itpr3	Gsk3b	Fbxo25						Pde4b	Il1b	Itgae	Enpp1	Noxa1	2900005J15Rik	Khnyn
			Npr2			Srsf10				Ifitm2	Vps4b				Cldn9		Ppa2					Rasgrp1	Irs1	Csf3r	Aox2	Cd38	Itk	Fbxo32						Pde4d	Lef1	Itgb8	Gm17435	Gm26583	6430590A07Rik	Ets2
			Rev3l							Ifitm1	Vps4a				Tff3		Lhpp					Ifitm2	Pik3r2	Jak1	Aox1	Sphk2	Vav1							Pdk1	Tcf7	Itih5	Fbxo17	Ston1	Myo6	Bhlhb9
			Edf1							Ifitm3	Vta1				Stc1							Ifitm1	Pik3r1	Jak2	Aox4	Sphk1	Vav2							Pdpk1	Atp7a	Izumo1r	Lamc1	B630019A10Rik	B230307C23Rik	Cdkn2aip
			Dfna5							Ifitm6	2610002M06Rik				Kif20a							Ifitm3	Pik3r3	Jak3	Aox3	Mcu	Vav3							Phpt1	Il12b	Kcnk6	Sgcb	Rasgef1a	Gm16034	Synj2
			Tmed2							Ifitm7	Chmp1b				Gys2							Ifitm6	Pik3ca	Col1a1	Gfap	Vdac1	Rac1							Pik3ca	Ptger4	Kcnq5	Myb	Bbc3	Prelid2	Pcmtd2
			Stx3							Rnasel	Chmp1a				Slc37a4							Ifitm7	Pik3cd	Col1a2	Stam	Vdac2	Rac2							Pik3cb	Syk	Kif13a	Trmt61a	Gm31718	Gm29247	Brox
			Rae1							Emp1	Chmp5				Lhpp							Kcnj2	Pik3cb	Col2a1	Stam2	Vdac3	Rac3							Pik3cd	Zap70	Klf9	Dancr	Tmie	A630091E08Rik	AC154550.1
			Umps							Cav1	Ist1				Sdhc							Ly6e	Pten	Col4a1	Ptpn2	Slc25a4	Pak1							Pik3cg	Braf	Klrg1	Larp1b	Ampd1	Gm44264	Eaf1
			Eif1b							Dnm1l	Pdcd6ip				Nasp							Il18r1	Pdpk1	Col4a2	Ptpn6	Slc25a5	Cdc42							Pik3r1	Nkx2-3	Laptm4b	Jaml	Abca1	Tcrg-C4	Filip1l
			Ak3							Anxa1	Spg21				Aurka							Il10	Akt1	Col4a4	Irf9	Slc25a31	Was							Pik3r2	Pax1	Larp1b	Gm37881	Ift74	Gm26699	Fam160b2
			Nudt21							Top2a	Igf2r				B3gnt3							Kcna3	Akt2	Col4a6	Crebbp	Ppif	Wasl							Pik3r3	Rsad2	Lclat1	Abhd18	Rec8	Apoe	Parp6
			Rbx1							Isg20	Snx1				Isg20							Has2	Akt3	Col4a5	Ep300	Tnnc1	Rhoa							Pik3r5	Satb1	Ldlrad4	Amigo3	D930028M14Rik	Pinx1	Zbtb2
			Srsf6							Slc20a1	Snx2				Ldhc							Dcbld2	Chuk	Col4a3	Pias1	Tnnc2	4930544G11Rik							Plcg1	Themis	Lonrf1	Car12	Gm44750	Wdsub1	Erlin2
			Gmpr2							Madd	Snx32				Arpp19							Vip	Mapkap1	Col6a2	Pias2	Calm1	Rock1							Plcg2	Cyld	Lpxn	Ppp1r3b	Gm43963	Trib3	Pdcl
			Dctn4							Ppp2r5b	Snx5				Cenpa							Cd70	Rictor	Col6a1	Pias3	Calm4	Rock2							Ppp3ca	Sh3rf1	Lrig1	Mettl1	Apbb1	Angptl4	Tmem167b
			Gm21987							Bcap31	Snx6				Homer1							Rgs1	Prr5	Col6a6	Pias4	Calm3	Gnb1							Ppp3cb	Cbfb	Lta	Bbs12	Ntn1	F2rl2	Gemin4
			Cox17							Erbb3	Src				Bik							Slc31a1	Rhoa	Col6a3	Fhl1	Calm2	Gnb2							Ppp3cc	Runx1	Lxn	Etv6	Gm15503	Tcrg-C2	Gpkow
			Cmpk2							Nedd9	Hras				Cyb5a							Adrm1	4930544G11Rik	Col6a4	Ptpn11	Calml3	Gnb3							Ppp3r1	Runx3	Lysmd2	Mir17hg	Scarf1	Tcrg-C1	Vopp1
			Ccno							Sat1	Il2ra				Hax1							Gm9774	Prkca	Col6a5	Grb2	Calm5	Gnb4							Prkca	Cd83	Maf	Larp4	Wnt3	Sfrp2	L3mbtl3
										Pdcd4	Il2rb				Cog2							Kcnmb2	Prkcb	Col9a1	Sos1	Calml4	Gnb5							Prkcb	Nckap1l	Map3k8	Spry1	Mmp15	Il17rb	Zfp24
										Bcl2l2	Il2rg				Il13ra1							Serpine1	Prkcg	Col9a2	Sos2	Phkg1	Gng2							Prkcd	Sash3	Mapk12	Dnah7a	Dennd2c	Fsd1l	Gm16933
										Fez1	Rhoa				Nol3							Mxd1	Sgk1	Col9a3	Hras	Phkg2	Gng3							Prkce	Socs1	Matn2	Rragd	Art4	Dctd	Txnrd1
										Erbb2	4930544G11Rik				Cldn3							Axl	Lpin1	Lama1	Raf1	Phka2	Gng4							Prkci	Tnfsf4	Mbnl3	Myo6	Cxcr4	Uprt	Sec23a
										Dnaja1	H2-M2				Agrn							Mefv		Lama2	Pik3ca	Phka1	Gng5							Prkch	Irf1	Mcub	Ifitm3	Dnajc12	B430306N03Rik	Rhbdd1
										Dap3	H2-M3				Cln6							Pvr		Lama3	Pik3cd	Phkb	Gng5-ps							Prkcq	Otud5	Mdfic	Slc39a8	Wfikkn1	Gm4951	Slc39a3
										Dpyd	H2-M9				Txn1							Ccl24		Lama5	Pik3cb	Mylk	Gng7							Prkcz	Psmb11	Med7	A630091E08Rik	C230096K16Rik	Ptafr	Irf6
										Nefh	H2-Q1				Pam							Pde4b		Lama4	Pik3r2	Mylk3	Gng8							Prkd1	Tnfsf8	Melk	Tcrg-C4	Adh1	Setbp1	Gns
										Pak1	H2-Q10				Capn5							Lcp2		Lamb1	Pik3r1	Mylk2	Gng10							Prkd2	Tsc1	Mgat5	Lama5	A530021J07Rik	Zfp296	Arfip1
										Gpx4	H2-Q2				Pkp2							Pdpn		Lamb2	Pik3r3	Mylk4	Gng11							Prr5	Bcl6	Mxd1	Dna2		Aqp9	Zfp251
										Etf1	H2-Q7				Abcb6							Irf7		Lamb3	Akt1	Camk1g	Gng12							Pten	Cd46	Myo1c	Gfod2		Gm44445	Spidr
										Ccna1	H2-T22				Dcn							Met		Lamc1	Akt2	Camk1d	Gm5741							Ptpn11	Il23a	Myo1e	Trib3		H2-Q1	Oas3
										Gucy2e	H2-T23				Gmppa							Atp2a2		Lamc2	Akt3	Camk1	Gng13							Ptpn2	Cd74	Myo9a	Lhfp		Hbegf	Clic4
										Avpr1a	H2-T24				Bpnt1							Slc31a2		Lamc3	Mtor	Camk2d	Gngt1							Ptpn22	Dock2	Naf1	Tcrg-C2			Tmem18
											H2-T3				Ang5							Fzd5		Chad		Camk2g	Gngt2							Ptpn6	H2-DMa	Naip5	Jun			Otud6b
											H2-M10.4				Ang6							Itga5		Reln		Camk2b	Prex1							Ptpn7	Srf	Ncoa7	Tcrg-C1			Hdac5
											H2-M11				Ang							Sgms2		Thbs1		Camk2a	Elmo1							Ptprc	Stk11	Ndrg1	Gm26625			Ddx11
											H2-M1				Ang2							Marco		Comp		Camk4	Dock2							Ptprj	Aire	Neb	Clcn5			Pank4
											H2-M10.5				Ang4							Cd14		Thbs2		Ppp3cc	Ptk2							Raf1	Atg5	Nfil3	Gm17590			Rap2c
											H2-M10.2				Gpr87							Eif2ak2		Thbs3		Ppp3ca	Pxn							Rap1a	Ccr7	Nipa2	Dctd			Slc6a20b
											H2-M10.6				Gal3st1							Ros1		Thbs4		Ppp3cb	Bcar1							Rapgef1	Cd28	Nol4l	Syk			Acad11
											H2-T10				Aldh7a1							Atp2c1		Fn1		Ppp3r1	Crk							Rasa1	Fas	Nr4a2	Lif			Zfp719
											H2-Q6				Nt5e							Ndp		Spp1		Ppp3r2	Crkl							Rasgrp1	Mink1	Nrn1	B430306N03Rik			Zfp52
											H2-M10.3				Idh1							Btg2		Vtn		Nos1	Ptk2b							Rassf5	Card11	Nrp1	Tfap4			Plk4
											H2-Bl				Pygl							Msr1		Tnc		Nos2	Plcb1							Rel	Btnl1	Nt5e	H2-Q2			Acox1
											H2-D1				Ndufv3							Ptpre		Tnr		Nos3	Plcb3							Rela	Btnl6	Odc1	Lrrc66			Zmym1
											H2-K1				Ndst3							Rnf144b		Tnn		Pde1a	Plcb4							Rftn1	Il15	Osbpl3	Kcnk5			Hdac6
											H2-M10.1				Ppp2cb							Pcdh7		Tnxb		Pde1b	Plcb2							Rheb	Gadd45g	P2ry10	Capn5			Ncoa4
											H2-K1				Psmc4							Sphk1		Vwf		Pde1c	Rasgrp2							Rhoh	Il18r1	P4ha1	Kcnj15			Slc25a24
											H2-T3				Tpbg							Il18rap		Ibsp		Ptk2b	Rap1a							Rictor	Relb	Pafah1b3	Il12rb2			Ccdc117
											Gm8909				Tgfbi							Rtp4		Itga1		Itpkb	Rap1b							Rps6ka4	Batf	Pdcd1lg2	Fam19a3			Vps8
											Gm10499				Galk2							Raf1		Itga2		Itpka	Pard3							Rps6ka5	Bcl3	Peak1	Gm10684			Slc12a4
											H2-Q4				Cth							Chst2		Itga2b		Itpkc	Tiam1							Rptor	Cd8a	Pear1	Jund			Txndc16
											H2-T-ps				Kif2a							Itgb3		Itga3		Prkca	Prkcb							Shb	Abl1	Penk	Enah			Tdrp
											Gm11127				Cacna1h							Kif1b		Itga4		Prkcb	Prkcd							Shc1	Cyp26b1	Phlda1	4930528J11Rik			Dag1
											H2-M5				Ankzf1							Sele		Itga5		Prkcg	Ncf1							Skap1	Duxbl1	Phlpp1	Spred1			Cbx2
											Gm7030				Sap30							Nod2		Itga6			Grk1							Skap2	H2-Oa	Phtf2	Fes			Gm12258
											Folr1				Rbck1							C5ar1		Itga7			Grk2							Slc3a2	Mettl3	Pip5k1a	Naf1			4930503L19Rik
											Folr2				Elf3							Emp3		Itga8			Grk3							Slc7a5	Prelid1	Plagl1	6430571L13Rik			Trim23
											Izumo1r				Rpe							Clec5a		Itga9			Grk4							Sos1	Slc46a2	Plcb4	Setbp1			Gm13610
											Cav1				B4galt4							Tacr3		Itga10			Grk5							Sos2	Dtx1	Plcl1	Gm26577			4930427A07Rik
											Cav2				Depdc1a							Slc4a4		Itga11			Grk6							Sppl3	Ifnb1	Plp2	Gm11175			Zfp677
											Cav3				Rragd							Selenos		Itgav			Arrb1							Stim1	Nrarp	Plscr1	Aqp9			Pus10
											Ehd3				Ier3							Lta		Itgb1			Arrb2							Stim2	Prdx2	Pmaip1	2210408F21Rik			Cnr2
											Ehd4				Aldh9a1							Pik3r5		Itgb3										Tbc1d10c	Bad	Pmepa1	Mfsd2a			Hace1
											Eea1				Dld							Stab1		Itgb4										Tec	Cd27	Ppm1l	Hbegf			2610021A01Rik
											Rab5a				Mertk							Irf1		Itgb5										Tespa1	H2-Aa	Prg4				Brms1l
											Rab5b				Gclc							Icam4		Itgb6										Themis	Il12a	Prkca				Dsn1
											Rab5c				Fkbp4							P2rx4		Itgb7										Trac	Il1f8	Prnp				Slc26a6
											Rabep1				Sod1							Abi1		Itgb8										Traf6	Il1rl2	Pros1				Gm15491
											Rbsn				Med24							Cx3cl1		Ptk2										Trat1	Il2	Prr13				Zbtb14
											Rab4a				Ak3							Slc28a2		Pik3ca										Trbc1	Il2ra	Ptger2				Mcoln3
											Rufy1				Xylt2							Gm14085		Pik3cd										Trbc2	Pik3r6	Ptger4				Gm43857
											Ehd1				Artn									Pik3cb										Tsc1	Xbp1	Ptpn13				Cenpj
											Vps45				Chst4									Pik3r2										Tsc2	Zmiz1	Ptprs				Zkscan5
											Snx4													Pik3r1										Txk	Hsp90aa1	Rabgap1l				Zfp60
											Rab22a													Pik3r3										Ubash3a	Sart1	Rcn1				Ptgir
											Rab31													F2r										Usp12	Tnfsf9	Reep3				Klf11
											Rab10													Chrm1										Usp46	Sox13	Rgs1				Gm45515
											Rab8a													Chrm2										Usp9x	Ctla2a	Rgs16				Hspa13
											Rab35													Lpar1										Vav1	Dicer1	Rhoq				A130014A01Rik
											Rab11a													Lpar2										Vav2	Drosha	Rnase4				Arrdc3
											Rab11b													Lpar3										Vav3	Fanca	Rnf19b				Tmem156
											Rab11fip2													Lpar4										Was	Fancd2	Rora				Zfp420
											Rab11fip1													Lpar5										Wnk1	Kat2a	Rragd				1700066M21Rik
											Rab11fip5													Lpar6										Zap70	Cd44	Samhd1				Senp5
											Zfyve27													Gnb1											Ctla4	Samsn1				Bivm
											Kif5a													Gnb2											Btn2a2	Scamp1				Errfi1
											Kif5b													Gnb3											Carmil2	Sdc4				Zfp940
											Kif5c													Gnb4											Dusp10	Sec24a				AC117797.2
											Rab11fip4													Gnb5											H2-M3	Serpina3g				Slc15a2
											Rab11fip3													Gng2											Vsir	Serpinb6b				Zfp772
											Pard3													Gng3											Rc3h1	Sh3bgrl				Fancb
											Pard6a													Gng4											Myb	Sh3bgrl2				Il11ra1
											Pard6b													Gng5											Shb	Sh3gl3				Sh3bp4
											Pard6g													Gng5-ps											Il27	Sh3rf1				AC159649.3
											Prkcz													Gng7											Il4ra	She				Sh3tc1
											Prkci													Gng8											Jak3	Sla				Gm28913
											Cdc42													Gng10											Anxa1	Slamf1				Gm26615
											Smap2													Gng11											Ccl19	Slc12a2				Mfsd9
											Smap1													Gng12											Ccr2	Slc14a1				Gpc2
											Git1													Gm5741											Hlx	Slc22a15				Fbxl12os
											Git2													Gng13											Ripk2	Slc22a2				Tspan9
											Asap3													Gngt1											Socs5	Slc22a5				AC159196.3
											Asap2													Gngt2											Zfp35	Slc25a53
											Asap1													Pik3cg											Il18	Slc2a3
											Acap3													Pik3r5											Il6	Slc35d1
											Acap1													Pik3r6											Nlrp3	Slc4a7
											Acap2													Pdpk1											Prkcz	Slc9b2
											Arap1													Stk11											Rara	Smyd2
											Arap2													Prkaa1											Abl2	Snx18
											Arap3													Prkaa2											Blm	Socs2
											Agap3													Ddit4											Rpl22	Socs5
											Agap1													Tsc1											Pnp	Specc1
											Agap2													Tsc2											Ap3b1	Spin2c
											Arfgap1													Rheb											Ap3d1	Spry1
											Arfgap3													Mlst8											Tgfbr2	St3gal2
											Arfgap2													Mtor											Zbtb16	Ston1
											Psd4													Rptor											Foxp1	Stx11
											Psd3													Eif4ebp1											Gpr183	Swap70
											Psd													Eif4e											Rc3h2	Sypl
											Psd2													Eif4e2											Rora	Syt11
											Iqsec2													Eif4e1b											Irf4	Tanc2
											Iqsec1													Rps6kb2											Ly9	Tank
											Iqsec3													Rps6kb1											Slamf6	Tasp1
											Cyth1													Eif4b											Stat3	Tgfbr1
											Cyth2													Rps6											Ccr6	Tgm2
											Cyth3													Prkca											Ccl20	Tiam1
											Cyth4													Pkn1											Mir301	Tktl1
											Arfgef1													Pkn3											Smad7	Tlr7
											Arfgef2													Pkn2											Zc3h12a	Tmem136
											Gbf1													Sgk1											Malt1	Tmem158
											Arf1													Sgk2											Mir326	Tmem64
											Arf3													Sgk3											Nfkbiz	Tmtc4
											Arf5													Akt1											Loxl3	Tnfrsf18
																								Akt2											Tnfsf18	Tnfrsf1b
																								Akt3												Tnfrsf25
																								Magi1												Tnfrsf4
																								Magi2												Tnfrsf9
																								Pten												Tnfsf11
																								Them4												Traf1
																								Ppp2ca												Trim59
																								Ppp2cb												Trpm1
																								Ppp2r1a												Ttc30b
																								Ppp2r1b												Ttc39b
																								Ppp2r2d												Twsg1
																								Ppp2r2b												Unc119
																								Ppp2r2c												Usp27x
																								Ppp2r2a												Vav2
																								AC157515.1												Vps54
																								AC174776.1												Wdr78
																								Ppp2r3c												Wls
																								Ppp2r3a												Xdh
																								Ppp2r3d												Xxylt1
																								Ppp2r5b												Ybx3
																								Ppp2r5c												Ypel2
																								Ppp2r5d												Zc3h12c
																								Ppp2r5e												Zc3h12d
																								Ppp2r5a												Zcchc18
																								Hsp90aa1												Zfp467
																								Hsp90ab1												Zfp52
																								Hsp90b1												Zfp821
																								Cdc37
																								Crtc2
																								Phlpp1
																								Phlpp2
																								Tcl1
																								Tcl1b1
																								Tcl1b4
																								Mtcp1
																								Nos3
																								Brca1
																								Gsk3b
																								Gys1
																								Gys2
																								Pck1
																								Pck2
																								G6pc
																								G6pc2
																								G6pc3
																								Myc
																								Ccnd1
																								Cdkn1a
																								Cdkn1b
																								Cdk2
																								Cdk4
																								Cdk6
																								Ccnd2
																								Ccnd3
																								Ccne1
																								Ccne2
																								Foxo3
																								Rbl2
																								Fasl
																								Bcl2l11
																								Ywhaz
																								Ywhab
																								Ywhaq
																								Ywhae
																								Ywhah
																								Ywhag
																								Bad
																								Bcl2l1
																								Bcl2
																								Casp9
																								Creb1
																								Atf2
																								Atf4
																								Creb3
																								Creb3l1
																								Creb3l2
																								Creb3l3
																								Creb3l4
																								Creb5
																								Atf6b
																								Mcl1
																								Rxra
																								Nr4a1
																								Ikbkg
																								Chuk
																								Ikbkb
																								Rela
																								Nfkb1
																								Myb
																								Mdm2
																								Trp53

## Sheet: Table S5 GSEA results
Gene set	Size	ES	NES	p value	FDR-adjusted p value	FWER-adjusted p value	Genes in leading edge	Number of CLIP targets in leading edge	CLIP targets in leading edge
ENDOCYTOSIS	213	0.606642	2.1829	0	0	0	76	25	Igf2r; Chmp1b; Chmp5; Wipf2; Grk2; Mdm2; Rnf41; Arf3; Ehd4; Arap2; Traf6; H2-M3; Pip5k1a; Vps37b; Cyth1; Rab5c; Il2rg; Vps36; Kif5b; Arpc3; Pard6g; Sh3glb1; Rab22a; Igf1r; Ccr5
TCR SIGNALLING	210	0.568287	2.06754	0	0	0	73	40	Rptor; Lat; Dgka; Ets1; Dok2; Cd2; Gata3; Cd247; Kras; Malt1; Lcp2; Pak2; Prkca; Pde4b; Stim1; Rasgrp1; Sos1; Pik3r1; Grb2; Pik3cd; Slc7a5; Ppp3cc; Gsk3b; Rftn1; Ppp3r1; Traf6; Usp12; Evl; Cish; Cd28; Calm3; Pik3ca; Ptprc; Crk; Map3k1; Nfatc1; Nr4a3; Nr4a1; Map3k7; Rassf5
DECREASED IN IL-2	159	0.545223	1.89253	0	0.00454625	0.009	62	12	Btg2; Klf3; Rab3ip; St8sia6; Sesn3; Pde4b; Kif21b; Ddit4; Hist3h2a; Madd; Evl; Trp53inp1
DECREASED IN IL-7	233	0.485789	1.79776	0	0.00959876	0.025	88	30	Rap2c; Ets1; Dck; Mdm2; Tmem71; Cry1; Slc2a3; Cnst; Eaf1; Serinc1; Slc12a4; Pip4k2c; Senp5; Ets2; Pdcl; Ptk2b; Hmgcr; Calu; Dnmt1; Clic4; Pecam1; Plekha2; Sacm1l; Rassf5; Sp3; Ppp2r1b; Rnf2; Aplp2; Msn; Txnrd1
JAK STAT SIGNALING PATHWAY	93	0.545412	1.76886	0	0.0100701	0.033	27	18	Ifng; Ccnd3; Stat1; Pim1; Il6ra; Mcl1; Il21r; Il10ra; Sos1; Pik3r1; Grb2; Pik3cd; Bcl2l1; Cish; Stat5b; Jak2; Il2rg; Pik3ca
TNF SIGNALING PATHWAY	90	0.518953	1.66169	0.00686499	0.0229334	0.089	27	9	Casp8; Cflar; Irf1; Pik3r1; Pik3cd; Pik3ca; Tnf; Casp3; Map3k7
IL-2 RECEPTOR SIGNALLING	40	0.570726	1.57384	0.0152174	0.0421826	0.182	18	10	Stat1; Kras; Sos1; Pik3r1; Grb2; Pik3cd; Gsk3b; Stat5b; Il2rg; Pdpk1
INCREASED IN IFNG	77	0.476846	1.50555	0.0247525	0.068448	0.313	20	11	Agpat3; Egr2; Slc4a7; Satb1; Pim3; Ubl3; Bcl2l1; Uhrf1bp1l; Cd28; Jund; Clic4
MTOR SIGNALING PATHWAY	114	0.414276	1.3867	0.0454545	0.135796	0.563	20	13	Rptor; Atp6v1d; Atp6v1e1; Kras; Prkca; Sos1; Pik3r1; Ddit4; Grb2; Pik3cd; Slc7a5; Gsk3b; Clip1
APOPTOSIS	132	0.400435	1.37871	0.0284974	0.127579	0.579	32	19	Igf2r; Btg2; Casp8; Mcl1; Cd2; Cflar; Rock1; Smad7; Irf1; Cdk2; Satb1; Vdac2; Ier3; Hmgb2; Bcl2l1; Bax; Ppp3r1; Lef1; Madd
TREG SIGNATURE	292	0.363026	1.37461	0.00817439	0.119355	0.589	46	18	Ikzf3; Igf2r; Cd200; Itih5; Mgat5; Egr2; Samsn1; Slamf1; Tmem64; Sh3rf1; Sla; Slc4a7; Ncoa7; Acot7; Gbp4; Slc2a3; Prkca; Ahcyl2
NOTCH SIGNALING PATHWAY	40	0.485182	1.3579	0.0917431	0.123756	0.635	5	3	Hdac1; Lfng; Notch1
PI3K AKT SIGNALING PATHWAY	205	0.363338	1.32446	0.0314961	0.143572	0.705	41	20	Rptor; Ccnd3; Il6ra; Mcl1; Mdm2; Kras; Prkca; Cdk2; Sos1; Pik3r1; Gnb1; Ddit4; Grb2; Pik3cd; Bcl2l1; Gsk3b; Gnb2; Itgb1; Ywhag; Ywhaz
CHEMOKINE SIGNALING PATHWAY	132	0.379774	1.32232	0.051597	0.134561	0.708	37	20	Stat1; Grk2; Rock1; Kras; Sos1; Pik3r1; Gnb1; Grb2; Pik3cd; Gsk3b; Gnb2; Stat5b; Ptk2b; Ccl3; Jak2; Pik3ca; Crk; Rap1b; Gnai2; Ccr5
FOXO SIGNALING PATHWAY	107	0.391568	1.30443	0.0628141	0.142118	0.76	36	18	Cdkn2d; Csnk1e; Mdm2; Kras; Ccng2; Cdk2; Sos1; Pik3r1; Grb2; Pik3cd; Stk4; Tgfb1; Klf2; Pik3ca; Plk1; Plk3; Igf1r; Nlk
LEUKOCYTE TRANSENDOTHELIAL MIGRATION	76	0.404805	1.28424	0.103524	0.152037	0.812	28	15	Itgb2; Rock1; Actn1; Prkca; Pik3r1; Pik3cd; Itgb1; Myl12a; Ptk2b; Pik3ca; Ezr; Rap1b; Pecam1; Gnai2; Rassf5
T CELL DIFFERENTIATION	212	0.355553	1.27471	0.0638821	0.152732	0.836	54	31	Ifng; Spn; Lig4; Sh3rf1; Lfng; Gata3; Egr1; Zmiz1; Rc3h2; Malt1; Bcl11b; Smad7; Irf1; Rasgrp1; Satb1; Sos1; Itpkb; Zbtb7b; Sox4; Lef1; H2-M3; Tgfb1; Cd28; Stat5b; Rc3h1; Runx1; Cbfb; Il2rg; Ptger4; Ikzf1; Ptprc
CALCIUM SIGNALING PATHWAY	95	0.383999	1.26035	0.104911	0.158205	0.858	23	9	Prkca; Stim1; Vdac2; Itpkb; Ppp3cc; Ppp3r1; Ptk2b; Calm3; Atp2a2
TOLL LIKE RECEPTOR SIGNALING PATHWAY	75	0.37997	1.19873	0.188372	0.213101	0.942	19	8	Casp8; Stat1; Pik3r1; Pik3cd; Traf6; Ccl3; Pik3ca; Tnf
INFLAMMATORY RESPONSE	138	0.34932	1.17974	0.145038	0.225938	0.961	28	14	Btg2; Slamf1; Il10ra; Lcp2; Pvr; Irf1; Pde4b; Rasgrp1; Hif1a; Kif1b; Tnfrsf9; Atp2a2; Mxd1; Ptger4
TGF BETA SIGNALING PATHWAY	54	0.389473	1.15762	0.217687	0.242865	0.975	16	7	Ifng; Rock1; Smad7; Tgfb1; Tnf; Sp1; Ppp2r1b
ONE-CARBON METABOLIC PROCESS	20	0.452745	1.12053	0.310277	0.286846	0.988	2	2	Mthfd2; Ahcyl2
RNA DEGRADATION	73	0.341709	1.06537	0.337321	0.367844	0.997	11	5	Btg2; Btg1; Lsm8; Papd7; Mphosph6
CELL CYCLE	116	0.309337	1.03903	0.354916	0.398585	1	15	10	Hdac1; Cdkn2d; Ccnd3; Mdm2; Rad21; Cdk2; Gsk3b; Ywhag; Ywhaz; Tgfb1
UNFOLDED PROTEIN RESPONSE	102	0.260197	0.850854	0.793451	0.796849	1	29	15	Mthfd2; Paip1; Edem1; Nabp1; Hyou1; Cebpg; Ddit4; Slc7a5; Exoc2; Kif5b; Slc30a5; Cnot6; Ern1; Calr; Ssr1
OXIDATIVE PHOSPHORYLATION	115	0.24959	0.836489	0.809745	0.795786	1	14	6	Cox17; Atp6v1d; Atp6v1e1; Cox7a2; Atp6ap1; Atp6v1h
PROTEASOME	45	-0.2849	-0.793107	0.763158	0.844998	1	22	1	Psmd7
CITRATE CYCLE TCA CYCLE	28	-0.362617	-0.921809	0.555154	0.629245	1	2	0
SPLICEOSOME	126	-0.300865	-0.967375	0.5	0.567411	1	26	7	Hnrnpm; Hspa8; Hnrnpa1; Magoh; Snrpf; Sf3b6; Pcbp1
GLYCOLYSIS	154	-0.315508	-1.04134	0.35034	0.451251	0.999	32	3	Txn1; Pgm1; Pfkp
DECREASED IN IFNG	59	-0.368074	-1.06215	0.33452	0.445264	0.999	10	1	Gng2
AMINO SUGAR AND NUCLEOTIDE SUGAR METABOLISM	45	-0.403092	-1.12988	0.268761	0.347178	0.998	17	1	Pgm1
LYSOSOME	112	-0.366816	-1.16131	0.188834	0.325541	0.994	22	1	M6pr
DNA REPLICATION	35	-0.457627	-1.20095	0.224014	0.294726	0.989	13	1	Mcm3
CHOLESTEROL HOMEOSTASIS	64	-0.415871	-1.22833	0.156305	0.28538	0.972	11	2	Anxa5; Plaur
DNA REPAIR	144	-0.399726	-1.30636	0.0694215	0.213434	0.902	38	3	Hprt; Taf12; Trp53
RNA POLYMERASE	28	-0.535278	-1.34587	0.117002	0.198996	0.843	9	2	Polr3g; Polr3d
FATTY ACID METABOLISM	34	-0.566065	-1.47542	0.0632689	0.106881	0.576	8	0
AMINOACYL TRNA BIOSYNTHESIS	44	-0.633215	-1.74916	0.00720721	0.0180365	0.103	18	1	Lars2
INCREASED IN IL-2	194	-0.552	-1.89162	0	0.00818979	0.036	59	12	Map3k8; Rrp9; Myc; Mrto4; Sgcb; Dcun1d2; Ltv1; Polr3d; Rgs1; Nop58; Nifk; Vim
RIBOSOME BIOGENESIS IN EUKARYOTES	71	-0.652695	-1.93576	0	0.00899827	0.026	32	11	Mdn1; Wdr43; Gtpbp4; Utp4; Mphosph10; Imp4; Tbl3; Nop58; Rexo2; Nob1; Wdr75
INCREASED IN IL-7	162	-0.64557	-2.15614	0	0	0	49	8	Rrp9; Pno1; Myc; Rgs1; Nop58; Rexo2; Tmed5; Nob1

## Sheet: Table S6 naive and eff Treg
Treg.naive	Treg.effector
Gm37909	Npas2
Bcl2	Il1r2
Gm15675	Il1r1
1700025G04Rik	Il1rl1
Sell	Il18r1
Selp	Il18rap
Atp1b1	Gpr45
G0s2	1700019D03Rik
Itih5	4930558J18Rik
C1ql3	Icos
Gm37811	Tmbim1
St8sia6	Wnt10a
Gm37126	Gm28942
Gm13546	Gm28884
Acvr1c	Gpr55
Gm13620	Nmur1
Cybrd1	Pdcd1
Slc30a4	Tmem37
Lhfp	Slc35f5
Ampd1	Nckap5
Ovgp1	Il10
S1pr1	Atp2b4
Gm9889	Cacna1s
Gm42928	Gm37759
Cnn3	Xcl1
Gm42929	Fcer1g
Gm42449	Slamf7
Ptger3	Sccpdh
Bach2	Lyplal1
Gabrr2	Mcm10
Drc1	Nebl
Sorcs2	Il1rn
Txk	Noxa1
Oas2	Gm20532
Stx1a	Fam69b
Prkar1b	Slc2a6
Gpr146	Stxbp1
Grifin	Fam129b
Cd8a	Angptl2
Tspan9	Ptgs1
Plaur	Ttn
Cd177	Rapsn
Spon1	Bub1b
Mcf2l	Spint1
Tdrp	Nusap1
5830468F06Rik	Sema6d
Psd3	Gm14005
Klf2	Ckap2l
Mmp15	Plcb4
Gpr83	Jag1
Arhgap20	Slc24a3
Fbxl22	Rin2
Myo6	Cst7
Impg1	Gm11454
Mei4	Tox2
Tmem108	Ube2c
Als2cl	Mmp9
Gm43127	Tshz2
Glt8d2	Gm26883
Rab3ip	Cass4
Emid1	Bmp7
Ccnjl	Edn3
Pdlim4	Zc2hc1a
Igfbp4	C030034L19Rik
Cdhr3	Pld1
Actn1	Gpr160
2610307P16Rik	Il2
Gm26735	Il21
Sox4	P2ry1
Tubb2a	Mlf1
Tubb2b	Fhdc1
Dapk1	Fcrl5
AC154176.2	Gm42674
AC159196.3	S100a4
4933413J09Rik	S100a6
Trdv2-2	S100a11
Mtss1	Rorc
Ly6d	Gm43401
Ly6c1	Lingo4
Amigo2	Slc22a15
Gm29331	Rhoc
Adcy6	Npnt
Filip1l	Gbp2b
Zdhhc14	Gm26857
Treml2	Penk
B430306N03Rik	A830012C17Rik
Satb1	Atp6v0d2
E430014B02Rik	Bspry
C230085N15Rik	Fam151a
Gm36931	Acot11
5830444F18Rik	Orc1
Gm37248	Cdkn2c
Gm6934	Kif2c
Gm37593	Cited4
Gm37176	Serinc2
Bambi	Zfp683
Cdo1	Alpl
Adrb2	Tnfrsf8
Lrp5	Ctnnbip1
Rasgrp2	Fgl2
Gm37387	Crmp1
Cc2d2b	Cc2d2a
Dntt	Ncapg
Pyroxd2	Igfbp7
Tcf7l2	Cxcl10
	Plac8
	Mapk10
	Vsig10
	Gm42495
	Gm42500
	Lat2
	Hip1
	Pvrig
	Adap1
	Rasl11a
	Pon3
	Asns
	Cav2
	Gm2663
	Repin1
	Tmem176b
	Tmem176a
	Osbpl3
	Chn2
	Il23r
	Reep1
	Actg2
	Magi1
	Il17re
	Pparg
	Klrg1
	Lag3
	Klrb1c
	Gm44511
	Klrb1f
	Klrd1
	Klrk1
	Klrc1
	Emp1
	Myadm
	Ncr1
	Atp1a3
	Axl
	Tyrobp
	Aplp1
	Zbtb32
	Cd22
	Gm29439
	Lsr
	Scn1b
	Cebpa
	Slc7a10
	Lrp3
	Plekhf1
	Klk15
	Gm44756
	Klk1b9
	Klk1b27
	Dkkl1
	Ntf5
	Ptpn5
	Nav2
	Gm44616
	Lrrk1
	Gm44851
	Arnt2
	Gdpd5
	Wee1
	Dkk3
	Itpripl2
	Tmem159
	Plk1
	Adam12
	Mki67
	Stk32c
	Utf1
	Adam8
	B4galnt4
	Tnfsf13b
	Zdhhc2
	Il12rb1
	2210011C24Rik
	Podnl1
	Syce2
	Cx3cl1
	Adgrg5
	Ces2c
	Mlkl
	Maf
	Gm15655
	Kcnk1
	Smco4
	Spc24
	Tmem205
	Anln
	Igsf9b
	St14
	Nrgn
	Cxcr5
	Zbtb16
	Cib2
	Cyp1a1
	Pclaf
	Dapk2
	Rora
	Fam81a
	Ccnb2
	Bcl2a1d
	Plscr1
	Chst2
	Ky
	Ryk
	Trf
	Ccr4
	Ccr8
	Cxcr6
	Xcr1
	Ccr1
	Ccr3
	Stx11
	Txlnb
	Prdm1
	Spock2
	Aifm2
	Cdk1
	Susd2
	Matk
	Gna15
	Ifng
	AC153498.1
	AC153495.1
	Selenom
	Gas2l1
	Upp1
	Lgalsl
	Hmmr
	Havcr2
	Il4
	Fam83g
	Gas7
	Aurkb
	Alox8
	6330403K07Rik
	Pimreg
	Itgae
	Hic1
	Tlcd2
	Cpd
	Spag5
	Ccl1
	Ccl5
	Dusp14
	Rnf43
	Scpep1os
	Scpep1
	Hlf
	Tbx21
	Tbkbp1
	Nr1d1
	Cdc6
	Top2a
	Tns4
	Plekhh3
	Grn
	Cep112
	Cd300lf
	Birc5
	Dcxr
	Metrnl
	Fam84a
	Rrm2
	Id2
	AC163354.1
	Sostdc1
	Lrrn3
	Egln3
	Jdp2
	Gpr68
	Asb2
	Serpina9
	Serpina3f
	Serpina3g
	Vipr2
	Rapgef5
	Tcrg-V4
	Trgv2
	Hist1h2ah
	Serpinb1a
	Pxdc1
	Cd83
	Nfil3
	Tspan17
	CT010498.1
	Ctla2b
	AC160962.1
	Ctla2a
	Pcsk1
	Glrx
	Naip6
	Ccnb1
	D830030K20Rik
	Nid2
	Il17rb
	Chdh
	Lgals3
	Ang
	Rnase4
	Abhd4
	Ajuba
	Ltb4r1
	Gzmb
	Pbk
	Cysltr2
	Rubcnl
	Tnfsf11
	Matn2
	Pkhd1l1
	Naprt
	Slc39a4
	Apol7b
	Kctd17
	H1f0
	Cenpm
	Ccdc184
	Racgap1
	Mettl7a1
	Cela1
	Krt83
	Soat2
	Snai2
	Itgb5
	Tigit
	Ccdc80
	Alcam
	Gpr15
	B3galt5
	Sytl3
	Ccr6
	Gm16702
	Dll1
	Mmp25
	Baiap3
	Myo1f
	Ly6g5b
	Ebi3
	Gm16712
	Tnfsf14
	Qpct
	Epcam
	Cables1
	Ttc39c
	Hrh4
	March3
	Cd74
	Ska1
	Slc15a3
	Gna14
	Gcnt1
	Tmem2
	Tjp2
	Cep55
	Shtn1
	Cybb
	Smim10l2a
	5430427O19Rik
	Pcyt1b
	Maged1
	Kif4
	Cxcr3
	Fgf16
	Cysltr1
	Zcchc18
	Mid2
	Car5b
	Gpm6b

## Sheet: Table S7 Cluster markers
p_val	avg_log2FC	pct.1	pct.2	p_val_adj	gene	cluster
0	-0.711774	0.599	0.908	0	Ikzf2	0
3.67042e-306	-0.659438	0.225	0.645	6.05986e-302	Itgb1	0
1.08778e-295	-0.637586	0.11	0.535	1.79593e-291	Maf	0
9.85313e-237	-0.414729	0.773	0.92	1.62675e-232	AW112010	0
1.10966e-234	-0.480662	0.108	0.483	1.83205e-230	Ahnak	0
3.1341e-212	-0.49255	0.142	0.497	5.1744e-208	Icos	0
7.35198e-193	0.308665	0.455	0.165	1.21381e-188	Ly6c1	0
1.80779e-190	0.306486	0.637	0.325	2.98466e-186	Satb1	0
4.24377e-185	-0.431274	0.24	0.574	7.00646e-181	Nrp1	0
5.99381e-174	0.307141	0.776	0.479	9.89578e-170	S1pr1	0
4.17862e-157	0.283838	0.751	0.452	6.8989e-153	Gm2682	0
5.18897e-152	-0.401203	0.235	0.531	8.56699e-148	S100a11	0
1.50214e-149	-0.341427	0.062	0.338	2.48003e-145	Eea1	0
1.85255e-149	-0.413214	0.389	0.664	3.05856e-145	Tnfrsf4	0
4.69089e-148	-0.419067	0.125	0.402	7.74466e-144	Gm36660	0
6.26405e-139	0.281499	0.83	0.552	1.03419e-134	Klf2	0
1.80181e-136	-0.389842	0.199	0.473	2.97478e-132	Tbc1d4	0
1.50931e-133	-0.388213	0.293	0.564	2.49187e-129	Sh2d1a	0
1.02137e-132	-0.290917	0.828	0.913	1.68629e-128	S100a10	0
1.82908e-132	-0.336058	0.649	0.824	3.01981e-128	Izumo1r	0
3.24513e-132	-0.305699	0.072	0.33	5.35771e-128	Cst7	0
3.40369e-131	-0.310457	0.03	0.264	5.6195e-127	Itgae	0
1.74007e-127	-0.326706	0.151	0.423	2.87286e-123	Ctla4	0
5.41223e-125	0.250893	0.736	0.455	8.9356e-121	Sell	0
1.15871e-123	-0.316776	0.601	0.808	1.91303e-119	Ankrd12	0
1.75187e-123	-0.29338	0.669	0.841	2.89233e-119	Ndfip1	0
6.23381e-123	-0.333781	0.13	0.39	1.0292e-118	Bcl2a1b	0
3.03982e-119	-0.331459	0.738	0.853	5.01874e-115	Srgn	0
4.91966e-117	-0.287184	0.096	0.342	8.12236e-113	Cldnd1	0
8.12465e-116	-0.306506	0.259	0.528	1.34138e-111	Prr13	0
2.08135e-112	-0.335172	0.456	0.675	3.43631e-108	Mxd4	0
2.94565e-112	-0.309745	0.371	0.628	4.86327e-108	Smpdl3a	0
1.27282e-108	-0.312523	0.335	0.595	2.10142e-104	Il2rb	0
1.39575e-108	-0.284179	0.156	0.406	2.30439e-104	Nt5e	0
1.0825e-104	-0.320176	0.277	0.526	1.78721e-100	Samsn1	0
1.78038e-102	-0.258573	0.091	0.317	2.9394e-98	Smco4	0
2.89414e-101	-0.263434	0.144	0.384	4.77822e-97	Sh3bgrl	0
4.23627e-97	-0.257465	0.136	0.364	6.99408e-93	AU020206	0
8.13531e-97	-0.293449	0.262	0.511	1.34314e-92	Hif1a	0
2.5487e-96	-0.42434	0.108	0.316	4.20791e-92	S100a4	0
4.22005e-89	-0.277597	0.313	0.545	6.9673e-85	Itgal	0
1.80317e-88	-0.283885	0.264	0.49	2.97704e-84	Cd82	0
1.98521e-88	-0.287777	0.496	0.695	3.27759e-84	Tnfrsf18	0
1.03233e-87	-0.278059	0.312	0.542	1.70437e-83	Agfg1	0
1.87109e-87	-0.254743	0.14	0.355	3.08916e-83	Dleu2	0
5.53068e-86	-0.279581	0.324	0.555	9.13115e-82	St8sia4	0
6.76139e-84	-0.2761	0.669	0.816	1.11631e-79	Stat1	0
1.04461e-79	-0.282361	0.307	0.523	1.72465e-75	Junb	0
6.03218e-77	-0.387271	0.172	0.361	9.95912e-73	S100a6	0
4.32697e-76	-0.276617	0.405	0.611	7.14382e-72	Tox	0
2.47871e-68	-0.286991	0.436	0.605	4.09235e-64	Capg	0
1.2524e-65	-0.274605	0.545	0.697	2.06771e-61	Ighm	0
8.44257e-64	-0.251497	0.536	0.707	1.39387e-59	Sdf4	0
2.01552e-62	-0.298639	0.464	0.63	3.32763e-58	Lgals1	0
5.54241e-62	-0.261849	0.555	0.711	9.15052e-58	Hmgb2	0
1.38275e-52	-0.263917	0.321	0.487	2.28292e-48	Rgs1	0
0	-0.302407	0.988	0.997	0	Rpl35	1
0	-0.321241	0.996	1	0	Rplp0	1
0	-0.27675	0.995	0.998	0	Rpl28	1
0	-0.250539	0.997	1	0	Rps5	1
0	-0.260507	0.996	1	0	Rps12	1
0	-0.251655	0.999	1	0	Rpl41	1
0	-0.270969	0.997	0.999	0	Rps26	1
0	-0.297273	0.986	0.998	0	Rack1	1
0	-0.288866	0.987	0.998	0	Rpl15	1
0	-0.346433	0.97	0.994	0	Rps2	1
0	-0.316892	0.982	0.995	0	Rpl10a	1
1.33073e-301	-0.260747	0.988	0.998	2.19703e-297	Rps6	1
6.63133e-300	-0.278378	0.982	0.997	1.09483e-295	Gm10076	1
6.85532e-297	-0.27104	0.982	0.998	1.13181e-292	Rpl14	1
5.82455e-292	-0.310767	0.959	0.992	9.61632e-288	Eef1b2	1
1.15057e-290	-0.286282	0.972	0.995	1.89959e-286	Rpl29	1
5.43714e-271	-0.316605	0.943	0.987	8.97671e-267	Rpl7a	1
1.64043e-266	-0.274762	0.973	0.995	2.70835e-262	Rpl10	1
3.23769e-263	-0.276144	0.975	0.996	5.34543e-259	Rpl23a	1
2.76216e-255	-0.258411	0.985	0.997	4.56032e-251	Rpl36a	1
2.27403e-253	-0.285008	0.99	0.998	3.75442e-249	Cd52	1
3.9225e-233	-0.295996	0.944	0.982	6.47605e-229	Rpl4	1
6.27485e-233	-0.271627	0.964	0.992	1.03598e-228	Coro1a	1
2.97161e-223	-0.29231	0.932	0.989	4.90613e-219	Pfn1	1
5.95232e-216	-0.266771	0.96	0.991	9.82728e-212	Naca	1
1.91804e-212	-0.299011	0.935	0.981	3.16669e-208	Rps17	1
1.92782e-211	-0.329589	0.884	0.963	3.18283e-207	Rpl31	1
4.12653e-211	-0.352582	0.873	0.963	6.8129e-207	Npm1	1
6.0025e-201	-0.292822	0.948	0.99	9.91013e-197	Actg1	1
1.93074e-175	-0.269286	0.918	0.978	3.18765e-171	Rpl36al	1
2.05315e-174	-0.398357	0.7	0.889	3.38975e-170	Nme2	1
3.69969e-173	-0.282916	0.901	0.975	6.10819e-169	Atp5e	1
2.84512e-169	-0.28078	0.931	0.978	4.69729e-165	Hspa8	1
8.62238e-156	-0.280405	0.887	0.967	1.42355e-151	Cfl1	1
1.95087e-146	-0.287319	0.86	0.958	3.22089e-142	Eef2	1
3.70514e-146	-0.292414	0.844	0.948	6.11719e-142	Btf3	1
2.24034e-141	-0.252891	0.952	0.989	3.6988e-137	Hsp90ab1	1
2.43633e-140	-0.279145	0.877	0.963	4.02237e-136	Sh3bgrl3	1
1.61281e-129	-0.387554	0.721	0.889	2.66275e-125	Crip1	1
1.65236e-125	-0.327226	0.722	0.893	2.72804e-121	Cyba	1
1.68012e-125	-0.261002	0.88	0.967	2.77389e-121	Calm1	1
6.32704e-116	-0.349473	0.062	0.322	1.04459e-111	Igfbp4	1
6.5291e-113	-0.379917	0.284	0.576	1.07795e-108	Sell	1
3.12428e-109	-0.333122	0.165	0.452	5.15818e-105	Satb1	1
5.13338e-109	-0.347261	0.497	0.764	8.47521e-105	Npc2	1
1.01862e-107	-0.277962	0.809	0.927	1.68174e-103	Psme1	1
9.32933e-102	-0.296469	0.729	0.878	1.54027e-97	Eef1g	1
2.19507e-101	-0.308416	0.047	0.276	3.62405e-97	Ly6c1	1
3.21345e-100	-0.281976	0.764	0.904	5.3054e-96	Nsa2	1
3.71658e-91	-0.351938	0.236	0.503	6.13608e-87	Ly6a	1
7.86122e-91	-0.318591	0.612	0.813	1.29789e-86	Psme2	1
3.05815e-88	-0.280957	0.779	0.89	5.049e-84	Rpl22l1	1
4.87424e-86	-0.274961	0.729	0.877	8.04738e-82	Actr3	1
7.95849e-83	-0.333989	0.422	0.663	1.31395e-78	Klf2	1
1.13022e-81	-0.324213	0.352	0.595	1.86599e-77	S1pr1	1
2.67347e-81	-0.297076	0.608	0.812	4.41391e-77	Snrpf	1
1.25977e-77	-0.30581	0.513	0.736	2.07988e-73	Ldha	1
1.58816e-75	-0.287502	0.659	0.835	2.62205e-71	Rbm3	1
2.79556e-74	-0.298582	0.536	0.756	4.61547e-70	Slc25a5	1
1.51597e-71	-0.297591	0.332	0.567	2.50287e-67	Gm2682	1
4.87833e-70	-0.298685	0.333	0.576	8.05412e-66	Nme1	1
3.03197e-69	-0.280285	0.546	0.757	5.00579e-65	Wdr89	1
5.15371e-69	-0.299602	0.523	0.733	8.50878e-65	Hspe1	1
1.42366e-68	-0.283554	0.542	0.756	2.35045e-64	Atp5mpl	1
1.21251e-67	-0.286927	0.522	0.733	2.00185e-63	Cytip	1
1.59603e-67	-0.266223	0.679	0.842	2.63505e-63	Atp5b	1
2.41821e-67	-0.292093	0.506	0.72	3.99247e-63	Eif4a1	1
9.29678e-67	-0.280139	0.51	0.728	1.5349e-62	Cd47	1
1.09405e-65	-0.256813	0.736	0.864	1.80627e-61	Ccnd2	1
2.68267e-65	-0.25031	0.713	0.866	4.42909e-61	Eif3h	1
1.01043e-64	-0.269073	0.63	0.818	1.66822e-60	Snrpe	1
1.02166e-64	-0.293342	0.445	0.672	1.68677e-60	Gmfg	1
9.99051e-64	-0.255773	0.689	0.855	1.64943e-59	Ndufa4	1
1.01465e-62	-0.263973	0.602	0.795	1.6752e-58	Eif3k	1
1.46047e-61	-0.251768	0.7	0.854	2.41124e-57	Ndufb1-ps	1
3.1695e-61	-0.268905	0.564	0.771	5.23284e-57	Atp5d	1
4.81651e-58	-0.258896	0.387	0.621	7.95206e-54	Eif3i	1
7.06711e-58	-0.277314	0.61	0.777	1.16678e-53	Eif5a	1
9.47025e-58	-0.261872	0.597	0.774	1.56354e-53	Slc25a3	1
1.14272e-57	-0.293869	0.419	0.612	1.88663e-53	Bcl2	1
1.83594e-57	-0.257864	0.623	0.799	3.03113e-53	Atp5md	1
2.34053e-57	-0.280494	0.462	0.692	3.86421e-53	Ran	1
2.92956e-57	-0.25809	0.366	0.596	4.83671e-53	Snrpd3	1
6.04667e-57	-0.27875	0.449	0.662	9.98306e-53	Atp5g1	1
9.76962e-55	-0.261589	0.516	0.724	1.61296e-50	Foxp1	1
7.54155e-53	-0.280892	0.406	0.614	1.24511e-48	Mif	1
8.68753e-53	-0.254943	0.591	0.779	1.43431e-48	Cox7b	1
9.18171e-53	-0.251833	0.312	0.522	1.5159e-48	Rexo2	1
1.99774e-52	-0.25325	0.384	0.599	3.29826e-48	Eno1	1
2.11833e-50	-0.257251	0.515	0.707	3.49736e-46	Cotl1	1
7.79634e-50	-0.254315	0.507	0.705	1.28718e-45	Uqcrq	1
4.59882e-48	-0.252995	0.497	0.703	7.59266e-44	Bola2	1
1.01844e-29	-0.262998	0.477	0.619	1.68145e-25	Lgals1	1
1.54462e-18	-0.264264	0.196	0.285	2.55016e-14	S100a4	1
2.14465e-15	-0.253517	0.246	0.334	3.54082e-11	S100a6	1
6.34779e-239	0.257586	1	0.988	1.04802e-234	Rps2	2
8.8645e-201	0.28599	0.991	0.937	1.46353e-196	Npm1	2
7.93187e-183	0.450454	0.845	0.522	1.30955e-178	Bcl2	2
1.93974e-167	0.321769	0.965	0.85	3.20251e-163	Rpl22l1	2
5.02003e-139	0.3937	0.718	0.415	8.28808e-135	Il2ra	2
6.25773e-124	-0.463959	0.203	0.482	1.03315e-119	Maf	2
7.78802e-117	0.359756	0.773	0.471	1.2858e-112	Sell	2
1.10516e-97	0.38344	0.643	0.41	1.82462e-93	Rgs1	2
7.53671e-95	0.305763	0.702	0.439	1.24431e-90	Rexo2	2
2.45836e-84	0.30772	0.751	0.477	4.05875e-80	Gm2682	2
7.26362e-83	-0.263197	0.522	0.689	1.19922e-78	Ighm	2
2.28645e-79	-0.333188	0.151	0.374	3.77493e-75	Gm36660	2
8.58225e-77	0.261595	0.854	0.661	1.41693e-72	Hspe1	2
7.3178e-70	-0.317307	0.259	0.445	1.20817e-65	Icos	2
1.12865e-69	0.263477	0.838	0.654	1.86341e-65	Foxp1	2
8.53572e-58	-0.351234	0.173	0.345	1.40925e-53	S100a6	2
5.10483e-55	0.25743	0.725	0.514	8.42807e-51	S1pr1	2
2.4204e-51	-0.356562	0.137	0.293	3.99608e-47	S100a4	2
3.78736e-51	-0.287893	0.447	0.567	6.25293e-47	Itgb1	2
0	0.794098	0.874	0.336	0	Icos	3
0	0.427244	0.378	0.038	0	Neb	3
0	0.538805	0.558	0.143	0	Arl5a	3
0	0.966312	0.751	0.186	0	S100a4	3
0	0.908249	0.762	0.241	0	S100a6	3
0	0.617524	0.847	0.397	0	S100a11	3
0	0.379455	0.355	0.037	0	Fgl2	3
0	0.801291	0.919	0.354	0	Maf	3
0	0.636188	0.647	0.135	0	Itgae	3
0	0.65005	0.81	0.326	0	Ahnak	3
1.5081e-290	0.45596	0.547	0.149	2.48987e-286	Glrx	3
3.63204e-279	0.439108	0.98	0.879	5.9965e-275	S100a10	3
8.37774e-279	0.285821	0.262	0.024	1.38316e-274	Il1rl1	3
1.60211e-212	0.363082	0.48	0.139	2.64508e-208	Rora	3
2.74514e-210	0.309404	0.276	0.044	4.53222e-206	Ctla2a	3
2.71832e-208	0.481952	0.843	0.519	4.48795e-204	Capg	3
1.42414e-204	-0.554766	0.213	0.637	2.35126e-200	Bcl2	3
2.96783e-201	0.404077	0.972	0.813	4.89989e-197	Ikzf2	3
2.51483e-194	0.51288	0.836	0.55	4.15198e-190	Lgals1	3
4.94255e-190	0.366013	0.406	0.109	8.16016e-186	Nav2	3
5.51654e-187	0.325641	0.353	0.086	9.10781e-183	Id2	3
3.49515e-171	0.364395	0.974	0.871	5.7705e-167	AW112010	3
4.97094e-168	0.375125	0.594	0.263	8.20702e-164	AU020206	3
9.1699e-166	0.400998	0.728	0.41	1.51395e-161	Serinc3	3
1.68988e-160	0.339545	0.543	0.217	2.79e-156	Smco4	3
1.07339e-159	0.354556	0.569	0.242	1.77216e-155	AI504432	3
1.40679e-157	0.273139	0.316	0.079	2.32261e-153	Ahr	3
7.58397e-156	0.410499	0.627	0.314	1.25211e-151	Ctla4	3
5.66742e-143	0.364329	0.545	0.241	9.35692e-139	Cldnd1	3
5.327e-132	0.411709	0.822	0.597	8.79488e-128	Vim	3
3.83382e-118	0.280579	0.46	0.192	6.32964e-114	Ptger4	3
1.12183e-116	0.279892	0.455	0.188	1.85214e-112	Fam129a	3
4.00649e-116	0.315486	0.937	0.807	6.61471e-112	Srgn	3
1.67773e-114	0.36491	0.592	0.313	2.76993e-110	Il7r	3
1.55751e-107	0.273016	0.425	0.181	2.57145e-103	Tnfrsf1b	3
1.26043e-101	0.278529	0.4	0.166	2.08097e-97	Il18r1	3
5.8524e-98	-0.342845	0.277	0.563	9.66232e-94	Gm2682	3
4.52009e-97	0.302439	0.692	0.427	7.46267e-93	Prr13	3
3.74851e-94	-0.298839	0.143	0.423	6.18879e-90	Ccr7	3
1.69672e-92	0.297749	0.582	0.326	2.80128e-88	Gata3	3
7.39732e-92	-0.287002	0.338	0.617	1.2213e-87	Tcf7	3
1.98557e-91	0.383594	0.751	0.513	3.27818e-87	Itgb1	3
1.95902e-87	0.253746	0.452	0.219	3.23435e-83	Cd44	3
5.18439e-83	-0.323304	0.068	0.307	8.55943e-79	Igfbp4	3
1.98061e-82	-0.316371	0.302	0.557	3.26998e-78	Sell	3
2.21374e-80	-0.300866	0.183	0.434	3.65488e-76	Satb1	3
2.15313e-78	-0.250863	0.311	0.564	3.55481e-74	Evl	3
3.58757e-75	0.288301	0.805	0.637	5.92308e-71	Ighm	3
1.61137e-71	0.253912	0.74	0.541	2.66037e-67	S100a13	3
1.42742e-69	-0.250568	0.266	0.495	2.35666e-65	Ift80	3
1.71163e-69	0.25627	0.54	0.315	2.8259e-65	Nt5e	3
8.55542e-67	0.252458	0.728	0.542	1.4125e-62	Smpdl3a	3
9.12719e-62	-0.262562	0.066	0.261	1.5069e-57	Ly6c1	3
2.43451e-58	0.271483	0.627	0.441	4.01938e-54	Samsn1	3
2.93377e-57	0.261453	0.524	0.341	4.84365e-53	Malt1	3
7.02433e-56	0.260027	0.758	0.573	1.15972e-51	Tnfrsf4	3
2.98618e-38	0.281051	0.565	0.433	4.93018e-34	Ly6a	3
0	0.47229	0.509	0.101	0	Pdcd1	4
0	0.681146	0.772	0.273	0	Gm36660	4
0	0.705849	0.833	0.347	0	Tbc1d4	4
3.26522e-282	0.53247	0.668	0.211	5.39088e-278	Cst7	4
2.55152e-278	0.47352	0.538	0.131	4.21256e-274	Cd83	4
3.67844e-274	0.574009	0.725	0.271	6.07311e-270	Bcl2a1b	4
5.41088e-261	0.476908	0.989	0.814	8.93336e-257	Ikzf2	4
5.01919e-235	0.309302	0.349	0.059	8.28669e-231	Rad51b	4
7.32684e-232	0.581548	0.813	0.455	1.20966e-227	Sh2d1a	4
5.20433e-231	0.266611	0.283	0.037	8.59235e-227	Tox2	4
2.06089e-224	0.58952	0.882	0.498	3.40254e-220	Itgb1	4
2.60028e-208	0.507258	0.611	0.224	4.29306e-204	Eea1	4
4.41044e-204	0.487294	0.78	0.387	7.28164e-200	Cd82	4
2.34017e-203	0.385608	0.252	0.035	3.86363e-199	Cxcl10	4
1.28144e-198	0.445701	0.456	0.129	2.11566e-194	Tnfrsf9	4
2.82686e-193	0.318582	0.392	0.093	4.66714e-189	Tspoap1	4
1.27662e-186	0.263091	0.315	0.06	2.10771e-182	Stx11	4
6.01977e-174	0.301233	0.35	0.081	9.93864e-170	Bcl2a1d	4
3.45019e-164	0.455758	0.266	0.051	5.69626e-160	Penk	4
2.31336e-163	0.375465	0.955	0.815	3.81935e-159	Gapdh	4
3.3177e-163	0.347261	0.434	0.132	5.47753e-159	Ckb	4
3.26774e-160	0.428157	0.693	0.337	5.39504e-156	2310001H17Rik	4
5.38546e-160	0.281193	0.355	0.09	8.8914e-156	Ebi3	4
6.62151e-159	0.419919	0.586	0.242	1.09321e-154	Cd81	4
7.25546e-155	-0.48493	0.294	0.664	1.19788e-150	Klf2	4
1.93405e-151	0.385704	0.505	0.188	3.19311e-147	Batf	4
9.83202e-151	0.376159	0.532	0.205	1.62327e-146	Cd200	4
9.11673e-150	0.334157	0.467	0.159	1.50517e-145	Larp1b	4
1.2958e-148	0.388336	0.927	0.762	2.13936e-144	Izumo1r	4
1.02619e-146	0.347239	0.968	0.874	1.69424e-142	AW112010	4
4.92668e-143	0.296703	0.967	0.872	8.13395e-139	Cox8a	4
2.62739e-142	0.26269	0.977	0.927	4.33782e-138	Cd3g	4
3.09037e-139	0.293723	0.988	0.958	5.1022e-135	Ifi27l2a	4
8.88667e-139	0.401605	0.752	0.452	1.46719e-134	Itgal	4
3.21404e-138	0.425963	0.795	0.452	5.30638e-134	Nrp1	4
1.19544e-137	0.326785	0.434	0.146	1.97367e-133	Odc1	4
1.51512e-137	-0.432358	0.248	0.593	2.50147e-133	S1pr1	4
2.09006e-134	-0.426745	0.215	0.567	3.45068e-130	Gm2682	4
3.21569e-133	0.283024	0.383	0.118	5.30911e-129	Casp3	4
3.54389e-132	0.404936	0.805	0.528	5.85097e-128	Tox	4
4.04642e-131	0.323958	0.405	0.134	6.68064e-127	Ttn	4
4.47821e-131	-0.429802	0.223	0.564	7.39353e-127	Sell	4
1.52329e-128	0.442479	0.734	0.392	2.51495e-124	Maf	4
1.08821e-123	0.361058	0.563	0.254	1.79664e-119	Tiam1	4
2.88245e-123	0.351036	0.533	0.225	4.75892e-119	Smco4	4
2.94781e-122	0.411003	0.85	0.634	4.86683e-118	Ighm	4
6.32481e-120	0.3823	0.748	0.45	1.04423e-115	Agfg1	4
2.33319e-119	0.28754	0.471	0.179	3.8521e-115	Cyfip1	4
5.71234e-116	0.348183	0.889	0.681	9.43108e-112	Cox17	4
2.27549e-113	0.358708	0.935	0.81	3.75683e-109	Srgn	4
1.37302e-112	0.314518	0.948	0.78	2.26686e-108	Ndfip1	4
4.57305e-112	0.343748	0.431	0.164	7.5501e-108	Cd74	4
9.03275e-111	0.431221	0.806	0.57	1.49131e-106	Tnfrsf4	4
7.09631e-109	0.28965	0.463	0.186	1.1716e-104	Mrps6	4
1.45722e-108	0.390134	0.702	0.416	2.40587e-104	Hif1a	4
5.90571e-108	0.303871	0.359	0.122	9.75033e-104	Nav2	4
6.31651e-108	0.275331	0.407	0.149	1.04286e-103	Rilpl2	4
1.09415e-104	0.355716	0.687	0.388	1.80644e-100	Atpif1	4
2.44995e-103	0.292962	0.496	0.214	4.04487e-99	Ccdc50	4
3.40135e-103	0.251576	0.972	0.908	5.61562e-99	Cox6c	4
4.57603e-103	0.388403	0.83	0.643	7.55503e-99	Sdf4	4
7.49017e-97	0.346184	0.718	0.431	1.23663e-92	Samsn1	4
3.05298e-96	0.315571	0.582	0.291	5.04047e-92	Sh3bgrl	4
9.33442e-96	0.254237	0.336	0.117	1.54111e-91	Cxcr3	4
1.9303e-94	0.324213	0.715	0.44	3.18693e-90	Itm2c	4
1.54236e-93	0.305873	0.51	0.242	2.54643e-89	Nfatc1	4
4.26161e-93	0.29644	0.935	0.813	7.03592e-89	Rgs10	4
6.19527e-92	0.293119	0.895	0.757	1.02284e-87	Ucp2	4
3.93743e-90	0.327262	0.538	0.271	6.5007e-86	Dleu2	4
4.92726e-90	0.261021	0.486	0.218	8.13491e-86	Syt11	4
7.68529e-88	0.357712	0.781	0.601	1.26884e-83	Mxd4	4
3.83876e-85	0.332132	0.63	0.373	6.33779e-81	B3gnt2	4
3.72007e-83	0.267785	0.512	0.243	6.14184e-79	Ephx1	4
3.26108e-80	0.332324	0.644	0.395	5.38405e-76	Hopx	4
4.49324e-80	0.251277	0.412	0.181	7.41833e-76	Tmem256	4
1.37276e-79	0.30125	0.763	0.528	2.26643e-75	Itgb2	4
1.41749e-79	0.251015	0.446	0.202	2.34027e-75	Lrmp	4
8.26076e-79	0.264795	0.912	0.771	1.36385e-74	Cox7a2	4
1.38234e-78	0.256396	0.932	0.809	2.28225e-74	Ndufb1-ps	4
1.44491e-77	-0.250798	0.6	0.784	2.38554e-73	Ifi203	4
3.54391e-77	0.328144	0.815	0.639	5.851e-73	Hspa5	4
4.42644e-77	0.276618	0.889	0.747	7.30805e-73	Atp5md	4
5.93904e-74	0.25468	0.913	0.786	9.80536e-70	Mrpl52	4
6.0459e-74	0.264329	0.491	0.241	9.98178e-70	Gprin3	4
2.25845e-73	-0.285985	0.176	0.43	3.72869e-69	Satb1	4
3.55819e-73	0.270883	0.505	0.252	5.87457e-69	Cldnd1	4
8.19106e-73	0.300518	0.743	0.504	1.35234e-68	Il2rb	4
1.97547e-72	0.279645	0.898	0.74	3.26151e-68	Ankrd12	4
2.51871e-72	0.296475	0.707	0.458	4.15838e-68	Tnfaip8	4
2.7771e-71	0.296465	0.801	0.607	4.585e-67	Uqcr10	4
3.33923e-71	0.303785	0.83	0.622	5.51306e-67	Tnfrsf18	4
3.47601e-71	0.298391	0.793	0.614	5.7389e-67	Pkm	4
1.27984e-70	0.281077	0.914	0.821	2.11302e-66	H2afz	4
1.4213e-70	-0.260532	0.294	0.521	2.34657e-66	Arl4c	4
7.26201e-70	0.318293	0.678	0.442	1.19896e-65	Junb	4
1.04722e-69	0.29035	0.768	0.539	1.72896e-65	Smpdl3a	4
1.2206e-67	0.291125	0.73	0.503	2.01522e-63	Sec11c	4
2.78816e-65	0.261314	0.562	0.315	4.60325e-61	Ctsb	4
4.57967e-65	0.322012	0.702	0.491	7.56103e-61	Prkca	4
1.17436e-63	0.29067	0.785	0.606	1.93887e-59	Aldoa	4
3.39758e-62	-0.272652	0.052	0.259	5.60941e-58	Ly6c1	4
3.25878e-58	-0.275312	0.091	0.299	5.38025e-54	Igfbp4	4
4.01165e-58	0.250722	0.524	0.302	6.62324e-54	Etfb	4
7.26603e-56	0.271216	0.786	0.609	1.19962e-51	St13	4
4.59922e-55	0.253594	0.782	0.584	7.59332e-51	Rap1a	4
8.73876e-55	0.261626	0.477	0.276	1.44277e-50	Hdac7	4
4.77943e-54	0.254563	0.664	0.436	7.89084e-50	Prr13	4
1.61891e-53	0.279448	0.726	0.517	2.67282e-49	Slamf6	4
2.108e-53	0.254357	0.589	0.368	3.48031e-49	Ikzf4	4
2.90323e-53	0.269581	0.774	0.567	4.79323e-49	BE692007	4
4.31116e-53	0.260492	0.677	0.482	7.11773e-49	Prdx2	4
5.57474e-50	0.315468	0.713	0.552	9.20389e-46	Nfkbia	4
3.58851e-49	0.250341	0.667	0.432	5.92463e-45	S100a11	4
3.97478e-46	0.260135	0.695	0.495	6.56235e-42	Pou2f2	4
1.52224e-42	0.259829	0.748	0.598	2.51322e-38	Calr	4
8.78803e-32	0.255218	0.423	0.285	1.4509e-27	Gpr183	4
1.55939e-204	0.576627	0.618	0.195	2.57455e-200	Ly6c1	5
8.93082e-158	0.532186	0.82	0.416	1.47448e-153	Ly6a	5
1.46931e-148	0.295471	0.278	0.049	2.42583e-144	Ifit1	5
3.9609e-145	0.39104	0.485	0.15	6.53945e-141	Gbp2	5
3.29086e-128	0.449615	0.606	0.24	5.43322e-124	Igfbp4	5
1.95067e-127	-0.505329	0.645	0.855	3.22056e-123	Ikzf2	5
1.79097e-116	0.458403	0.623	0.285	2.95689e-112	Iigp1	5
1.96381e-114	0.431925	0.328	0.087	3.24225e-110	Dapl1	5
1.74172e-113	0.250014	0.997	0.961	2.87558e-109	Ms4a4b	5
1.23197e-112	0.429701	0.699	0.366	2.03399e-108	Igtp	5
5.72578e-94	0.392578	0.818	0.492	9.45326e-90	Sell	5
2.04026e-88	0.267426	0.404	0.143	3.36847e-84	Ifit1bl1	5
2.25824e-87	0.329217	0.939	0.788	3.72836e-83	Samhd1	5
3.74904e-84	0.351479	0.915	0.769	6.18967e-80	Stat1	5
6.29659e-84	0.35696	0.753	0.467	1.03957e-79	Ifi47	5
1.54406e-82	0.288063	0.453	0.182	2.54925e-78	Ms4a4c	5
1.56299e-77	0.356892	0.87	0.592	2.5805e-73	Klf2	5
1.17009e-75	0.317022	0.927	0.744	1.93182e-71	Ifi203	5
7.87029e-73	0.346257	0.784	0.496	1.29938e-68	Gm2682	5
2.06315e-63	0.324017	0.79	0.525	3.40626e-59	S1pr1	5
1.02114e-59	0.3336	0.788	0.555	1.6859e-55	Bcl2	5
2.77963e-58	0.279164	0.874	0.698	4.58917e-54	Npc2	5
2.38054e-56	0.296303	0.721	0.468	3.93028e-52	Slfn1	5
1.02407e-55	0.30735	0.62	0.378	1.69074e-51	Gbp7	5
1.84683e-54	0.299598	0.709	0.471	3.04912e-50	Arl4c	5
2.86957e-54	0.267372	0.861	0.669	4.73766e-50	Cd47	5
2.94797e-52	0.251557	0.44	0.216	4.86709e-48	Ifi208	5
1.33826e-51	0.266116	0.865	0.676	2.20947e-47	Cytip	5
2.68267e-51	-0.369997	0.346	0.567	4.42909e-47	Itgb1	5
1.40913e-50	0.290278	0.56	0.336	2.32648e-46	Gbp4	5
1.29462e-49	0.262353	0.515	0.284	2.13741e-45	Txk	5
2.9055e-49	0.270633	0.725	0.494	4.79698e-45	Smchd1	5
3.32071e-48	0.268523	0.827	0.631	5.4825e-44	9930111J21Rik2	5
5.92381e-46	-0.297022	0.428	0.617	9.78021e-42	Tnfrsf4	5
8.62517e-46	0.265403	0.626	0.375	1.42402e-41	Satb1	5
2.03906e-42	-0.280991	0.298	0.516	3.36649e-38	Nrp1	5
6.44819e-40	-0.273207	0.199	0.415	1.0646e-35	Ahnak	5
1.71134e-38	-0.272709	0.296	0.478	2.82542e-34	S100a11	5
6.53543e-36	-0.250205	0.312	0.496	1.079e-31	Zfp36l1	5
6.4274e-33	-0.252374	0.168	0.345	1.06116e-28	Bcl2a1b	5
5.61255e-32	-0.29876	0.275	0.452	9.26632e-28	Maf	5
1.08119e-29	-0.251932	0.263	0.424	1.78505e-25	Tbc1d4	5
1.11794e-29	-0.336308	0.119	0.282	1.84572e-25	S100a4	5
8.70118e-28	-0.263197	0.278	0.428	1.43657e-23	Icos	5
2.33835e-19	-0.276755	0.207	0.327	3.86061e-15	S100a6	5
0	0.414276	0.326	0.014	0	Nr4a3	6
0	0.567347	0.491	0.025	0	Egr2	6
0	0.672366	0.527	0.02	0	Egr3	6
0	0.592848	0.459	0.033	0	Nr4a1	6
0	0.804799	0.614	0.081	0	Egr1	6
1.14981e-241	0.49544	0.482	0.059	1.89834e-237	Nfkbid	6
1.22526e-204	0.554759	0.548	0.095	2.0229e-200	Tagap	6
7.09963e-145	0.6523	0.76	0.272	1.17215e-140	Cd69	6
5.8184e-124	0.606945	0.744	0.297	9.60618e-120	Rel	6
6.66601e-104	0.586567	0.731	0.311	1.10056e-99	Bcl2a1b	6
6.99311e-91	0.471555	0.514	0.167	1.15456e-86	Rilpl2	6
3.09583e-83	0.498223	0.954	0.82	5.11122e-79	Srgn	6
2.41605e-76	0.451212	0.664	0.308	3.98889e-72	Orai1	6
3.51425e-76	0.489861	0.806	0.457	5.80203e-72	Junb	6
1.88842e-66	0.43141	0.607	0.281	3.11778e-62	Dusp2	6
2.3261e-65	0.510337	0.826	0.561	3.8404e-61	Nfkbia	6
4.4328e-63	0.285119	0.292	0.073	7.31855e-59	Mir155hg	6
5.88007e-59	0.374791	0.479	0.189	9.708e-55	Kdm6b	6
1.2617e-51	0.259011	0.354	0.116	2.08307e-47	Nab2	6
1.5466e-49	0.349845	0.564	0.277	2.55344e-45	Ier2	6
1.49615e-46	0.27387	0.409	0.157	2.47014e-42	Kdm2b	6
9.85389e-43	0.322828	0.518	0.249	1.62688e-38	Jarid2	6
3.85239e-42	0.269929	0.393	0.158	6.36029e-38	Nfkbiz	6
5.45026e-42	0.428625	0.712	0.469	8.99839e-38	Zfp36l1	6
4.4314e-38	0.322106	0.845	0.654	7.31625e-34	Hspa5	6
1.09386e-36	0.339699	0.678	0.444	1.80595e-32	Traf1	6
1.62177e-34	0.308766	0.388	0.174	2.67754e-30	Cd83	6
8.42197e-33	0.257725	0.411	0.193	1.39047e-28	Zfp36	6
5.48389e-30	0.351909	0.779	0.592	9.0539e-26	Tnfrsf4	6
1.45597e-29	0.284492	0.772	0.554	2.40381e-25	Tox	6
3.96043e-28	0.280828	0.626	0.396	6.53867e-24	B3gnt2	6
2.6841e-27	0.253992	0.566	0.339	4.43145e-23	Sh2d2a	6
3.74157e-26	0.277346	0.696	0.458	6.17732e-22	Samsn1	6
9.54282e-26	0.266944	0.642	0.42	1.57552e-21	Ier5	6
3.27775e-24	0.26324	0.413	0.23	5.41157e-20	Gnl3	6
4.53527e-19	0.280089	0.651	0.512	7.48773e-15	Prkca	6
0	0.614945	0.574	0.004	0	Sgo2a	7
0	0.308118	0.309	0.001	0	Kif14	7
0	0.646006	0.529	0.002	0	Aspm	7
0	0.458848	0.5	0.002	0	Nuf2	7
0	1.16335	0.794	0.006	0	Cenpf	7
0	0.31924	0.324	0.002	0	Mcm10	7
0	0.290808	0.265	0.001	0	Sapcd2	7
0	0.773352	0.662	0.009	0	Spc25	7
0	0.749363	0.721	0.017	0	Arhgap11a	7
0	0.615965	0.603	0.005	0	Bub1b	7
0	0.997449	0.779	0.006	0	Knl1	7
0	0.713868	0.706	0.006	0	Rad51	7
0	1.15186	0.735	0.008	0	Nusap1	7
0	0.561824	0.544	0.005	0	Ncaph	7
0	0.551847	0.544	0.002	0	Bub1	7
0	0.702436	0.647	0.003	0	Ckap2l	7
0	0.982652	0.779	0.008	0	Tpx2	7
0	0.300649	0.368	0.002	0	Mybl2	7
0	1.228	0.824	0.018	0	Ube2c	7
0	0.836014	0.706	0.004	0	Ccna2	7
0	1.00069	0.691	0.009	0	Cenpe	7
0	0.435602	0.441	0.003	0	Depdc1a	7
0	0.470644	0.426	0.005	0	Ccne2	7
0	0.353289	0.397	0.003	0	Stil	7
0	0.478336	0.471	0.001	0	Kif2c	7
0	0.699519	0.603	0.013	0	Cdc20	7
0	1.20859	0.912	0.022	0	Cdca8	7
0	0.887058	0.75	0.021	0	Clspn	7
0	0.863934	0.779	0.018	0	Tacc3	7
0	0.667012	0.647	0.009	0	Ncapg	7
0	0.620474	0.603	0.006	0	Cit	7
0	0.404508	0.515	0.003	0	Kntc1	7
0	0.982599	0.794	0.007	0	Cdca3	7
0	0.637954	0.559	0.005	0	Rad51ap1	7
0	0.364828	0.426	0.003	0	Foxm1	7
0	0.457886	0.412	0.001	0	E2f8	7
0	0.640598	0.559	0.003	0	Plk1	7
0	0.652729	0.588	0.008	0	Kif22	7
0	0.533522	0.515	0.003	0	Shcbp1	7
0	0.573194	0.529	0.005	0	Ckap2	7
0	0.599168	0.559	0.002	0	Neil3	7
0	0.791003	0.735	0.019	0	Asf1b	7
0	1.05067	0.882	0.01	0	Spc24	7
0	0.397436	0.397	0.002	0	Anln	7
0	0.875756	0.721	0.013	0	Kif23	7
0	1.64037	1	0.022	0	Pclaf	7
0	1.01844	0.735	0.007	0	Ccnb2	7
0	0.318223	0.338	0.001	0	Ttk	7
0	0.850035	0.794	0.011	0	Kif15	7
0	0.99293	0.809	0.01	0	Cdk1	7
0	0.429147	0.5	0.008	0	Fignl1	7
0	0.917079	0.706	0.005	0	Hmmr	7
0	0.758499	0.662	0.004	0	Aurkb	7
0	0.430545	0.441	0.001	0	Pimreg	7
0	0.328478	0.353	0.002	0	Spag5	7
0	0.521945	0.485	0.005	0	Brip1	7
0	0.282095	0.294	0.002	0	Prr11	7
0	0.416443	0.456	0.006	0	Brca1	7
0	0.837446	0.735	0.012	0	Tk1	7
0	1.37535	0.912	0.012	0	Birc5	7
0	1.20491	0.926	0.018	0	Rrm2	7
0	0.661301	0.588	0.003	0	Mis18bp1	7
0	0.35561	0.412	0.001	0	Lrr1	7
0	0.741857	0.691	0.013	0	Ncapg2	7
0	0.834889	0.603	0.011	0	Hist1h2bm	7
0	0.380768	0.382	0.004	0	Hist1h2bn	7
0	0.284122	0.294	0.002	0	Hist1h2an	7
0	0.458845	0.441	0	0	Hist1h2af	7
0	0.453739	0.5	0.006	0	Hist1h2bh	7
0	1.62424	0.897	0.029	0	Hist1h3c	7
0	1.18988	0.691	0.015	0	Hist1h2ab	7
0	1.08338	0.662	0.007	0	Hist1h3b	7
0	0.487566	0.441	0.006	0	Cenpp	7
0	0.610675	0.603	0.002	0	Mxd3	7
0	0.404899	0.471	0.007	0	Trip13	7
0	0.613857	0.618	0.008	0	Cenph	7
0	0.652091	0.529	0.004	0	Ccnb1	7
0	0.60581	0.618	0.009	0	Cenpk	7
0	0.589781	0.515	0.003	0	Cdkn3	7
0	0.59232	0.618	0.002	0	Pbk	7
0	0.753753	0.618	0.003	0	Esco2	7
0	0.518481	0.544	0.004	0	Cdca2	7
0	0.934192	0.838	0.021	0	Diaph3	7
0	0.596984	0.662	0.007	0	Cenpm	7
0	0.260382	0.279	0	0	Troap	7
0	0.253075	0.279	0.001	0	Espl1	7
0	0.489924	0.5	0.004	0	Ccnf	7
0	0.747143	0.721	0.007	0	Sgo1	7
0	0.692169	0.647	0.014	0	Uhrf1	7
0	0.50662	0.544	0.001	0	Ska1	7
0	0.310343	0.353	0.002	0	Cdca5	7
0	0.955943	0.735	0.009	0	Kif11	7
0	0.590822	0.574	0.004	0	Cep55	7
0	0.64016	0.647	0.004	0	Kif4	7
1.02319e-307	1.12678	0.794	0.025	1.68929e-303	Prc1	7
4.21861e-300	0.462395	0.456	0.007	6.96493e-296	Hist1h2ai	7
9.9199e-300	0.427392	0.412	0.005	1.63778e-295	Aurka	7
1.10786e-297	0.329299	0.382	0.005	1.82907e-293	Chek1	7
1.36848e-291	0.439563	0.5	0.009	2.25936e-287	Cdc45	7
1.82273e-287	0.649766	0.544	0.011	3.00933e-283	Hist1h1a	7
1.79129e-286	0.536933	0.485	0.009	2.95741e-282	Hist1h2ak	7
4.45754e-286	0.491912	0.456	0.007	7.3594e-282	Hist1h4a	7
7.1786e-282	0.506393	0.441	0.007	1.18519e-277	Hist1h2ad	7
8.524e-282	0.353889	0.338	0.004	1.40731e-277	Hist1h2bp	7
2.97869e-278	0.371093	0.353	0.004	4.91782e-274	Cdc6	7
4.46782e-269	1.06027	0.868	0.036	7.37637e-265	Cks1b	7
3.09423e-266	0.466922	0.529	0.011	5.10857e-262	Bard1	7
6.33104e-263	0.453594	0.397	0.006	1.04525e-258	Hist1h3i	7
2.17021e-259	0.743759	0.574	0.015	3.58301e-255	Hist1h2bj	7
1.15488e-253	1.73265	1	0.055	1.90671e-249	Mki67	7
5.82456e-245	0.451967	0.471	0.01	9.61634e-241	Chaf1a	7
2.76317e-244	0.398787	0.397	0.007	4.562e-240	Cip2a	7
5.49623e-242	0.810019	0.632	0.02	9.07428e-238	Hist1h2bb	7
2.67174e-239	0.424092	0.456	0.009	4.41105e-235	Cenps	7
2.67581e-237	0.274016	0.265	0.003	4.41776e-233	Ccdc18	7
1.96035e-236	0.33873	0.338	0.005	3.23654e-232	Arhgap19	7
3.61365e-234	0.496246	0.544	0.014	5.96614e-230	Melk	7
3.83565e-229	0.387689	0.382	0.007	6.33266e-225	Ect2	7
3.132e-227	0.754214	0.75	0.031	5.17094e-223	Cenpw	7
1.30258e-226	0.457416	0.5	0.012	2.15055e-222	Kif20a	7
7.49206e-225	1.81023	1	0.064	1.23694e-220	Stmn1	7
4.98633e-214	1.64286	0.853	0.046	8.23242e-210	Hist1h1b	7
6.83597e-211	0.415311	0.412	0.009	1.12862e-206	Dtl	7
3.36453e-208	0.72333	0.779	0.036	5.55484e-204	Dlgap5	7
3.46052e-202	0.719442	0.647	0.025	5.71332e-198	Knstrn	7
4.01854e-202	0.280531	0.309	0.005	6.63462e-198	Poc1a	7
5.37788e-196	0.855922	0.706	0.033	8.87889e-192	Fbxo5	7
5.24119e-192	0.729777	0.662	0.028	8.6532e-188	Ndc80	7
7.15626e-191	1.59918	0.912	0.062	1.1815e-186	Top2a	7
1.66413e-189	0.500952	0.485	0.015	2.74747e-185	Tcf19	7
3.43374e-178	0.285248	0.324	0.006	5.66911e-174	Zwilch	7
7.96309e-177	0.331555	0.324	0.006	1.31471e-172	Hist1h3d	7
2.35285e-173	0.356059	0.412	0.011	3.88455e-169	Dnph1	7
3.8036e-172	0.682639	0.662	0.032	6.27975e-168	Ncapd2	7
6.74472e-172	0.873556	0.75	0.043	1.11355e-167	Racgap1	7
5.17448e-171	1.17543	0.765	0.046	8.54307e-167	Hist1h3f	7
4.94973e-170	0.554606	0.559	0.022	8.172e-166	Dhfr	7
4.68225e-164	0.51506	0.603	0.027	7.73039e-160	Mad2l1	7
2.67894e-161	1.11299	0.882	0.066	4.42293e-157	Tyms	7
1.48097e-158	0.722821	0.662	0.035	2.44508e-154	Prim1	7
1.59558e-154	0.947842	0.853	0.064	2.63431e-150	Rrm1	7
8.83349e-153	1.09521	0.941	0.083	1.45841e-148	Lockd	7
9.85278e-153	0.900227	0.824	0.059	1.62669e-148	Incenp	7
6.52211e-152	0.727657	0.721	0.044	1.0768e-147	Cdkn2c	7
1.87421e-150	0.657193	0.794	0.052	3.09432e-146	Pmf1	7
2.52902e-149	0.391867	0.397	0.012	4.17541e-145	Spdl1	7
1.17581e-141	0.922403	0.853	0.07	1.94126e-137	Gmnn	7
7.58199e-141	0.328579	0.368	0.011	1.25179e-136	Gen1	7
4.64819e-140	0.335466	0.353	0.01	7.67416e-136	Syce2	7
7.60438e-137	1.15042	0.897	0.083	1.25548e-132	Cks2	7
1.7394e-133	0.453215	0.471	0.02	2.87175e-129	Brca2	7
2.35869e-128	0.450731	0.5	0.024	3.8942e-124	Gins2	7
2.37211e-128	0.450748	0.441	0.018	3.91635e-124	Hist2h2bb	7
8.01227e-127	0.969409	0.662	0.046	1.32283e-122	Hist1h3e	7
1.17129e-125	0.762697	0.75	0.057	1.9338e-121	Ccdc34	7
3.95495e-125	0.542222	0.603	0.036	6.52962e-121	Plk4	7
5.50267e-124	0.655169	0.676	0.046	9.08492e-120	Hmgb3	7
6.53886e-124	0.269154	0.294	0.008	1.07957e-119	Ercc6l	7
1.55196e-123	0.516593	0.603	0.036	2.56229e-119	Rfc5	7
1.23886e-122	0.561764	0.574	0.033	2.04536e-118	Ube2t	7
7.94095e-122	0.259701	0.279	0.007	1.31105e-117	Gpsm2	7
5.19265e-120	0.397991	0.441	0.02	8.57306e-116	Kif18a	7
9.28658e-120	0.312214	0.338	0.011	1.53321e-115	Mastl	7
8.09975e-119	0.956837	0.794	0.073	1.33727e-114	Lig1	7
5.67024e-116	0.388982	0.456	0.022	9.36156e-112	Cenpl	7
4.13057e-115	0.84016	0.662	0.051	6.81958e-111	Kif20b	7
2.89764e-113	0.43851	0.456	0.022	4.784e-109	Hist1h3a	7
2.03529e-112	0.933052	0.706	0.06	3.36027e-108	Hells	7
6.57389e-110	1.23112	0.985	0.14	1.08535e-105	Lmnb1	7
2.68267e-107	0.570562	0.603	0.042	4.42908e-103	Nrm	7
4.16606e-107	0.754983	0.691	0.058	6.87816e-103	Mcm5	7
6.1983e-107	0.802207	0.603	0.045	1.02334e-102	Hist1h2br	7
3.21976e-105	0.768468	0.809	0.082	5.31583e-101	Prdx4	7
1.38717e-103	0.958478	0.794	0.082	2.29021e-99	Mcm3	7
7.99431e-103	0.551524	0.632	0.048	1.31986e-98	Fen1	7
2.55682e-101	1.24133	0.971	0.151	4.22132e-97	Smc2	7
4.70767e-100	0.829658	0.735	0.074	7.77236e-96	Orc6	7
1.77581e-99	0.349576	0.353	0.015	2.93187e-95	Slc43a3	7
5.51453e-96	0.771019	0.765	0.079	9.10449e-92	Tipin	7
7.97944e-94	0.54928	0.632	0.052	1.31741e-89	Hist1h4i	7
2.26588e-93	0.528316	0.632	0.052	3.74097e-89	Rbbp8	7
3.0532e-93	1.81092	0.912	0.136	5.04084e-89	Hist1h2ae	7
1.03269e-92	0.354212	0.397	0.021	1.70496e-88	Kifc1	7
4.60502e-87	0.874735	0.897	0.125	7.60288e-83	Hmgn5	7
2.09418e-86	0.536794	0.588	0.05	3.4575e-82	Mns1	7
3.50455e-86	0.296394	0.338	0.016	5.78602e-82	Zfp367	7
8.05788e-85	0.529846	0.515	0.039	1.33036e-80	Pola1	7
2.26363e-84	0.302295	0.324	0.015	3.73725e-80	Nmral1	7
5.06511e-84	0.340833	0.397	0.023	8.36249e-80	Pole2	7
3.36543e-82	0.735514	0.838	0.105	5.55633e-78	Ifi30	7
1.57199e-81	0.602928	0.544	0.046	2.59535e-77	Hist1h4c	7
4.58447e-81	0.296385	0.338	0.017	7.56896e-77	Hist1h2bg	7
1.69063e-80	1.04486	0.765	0.102	2.79123e-76	Hist1h1d	7
3.84926e-80	0.671092	0.632	0.065	6.35513e-76	Rfc4	7
5.3861e-80	0.329799	0.324	0.016	8.89245e-76	Ccne1	7
1.09673e-79	0.583569	0.559	0.049	1.81069e-75	Hist1h2be	7
1.92958e-78	1.10912	0.794	0.113	3.18574e-74	H2afx	7
2.11717e-78	0.6467	0.618	0.06	3.49544e-74	Tuba1c	7
2.70438e-78	0.541879	0.618	0.06	4.46493e-74	Haus4	7
8.83393e-77	0.332247	0.382	0.023	1.45848e-72	Pkmyt1	7
1.01494e-76	0.273469	0.353	0.019	1.67567e-72	Mms22l	7
1.13057e-76	0.479662	0.5	0.04	1.86657e-72	Kpna2	7
5.78582e-75	1.10545	0.691	0.088	9.55238e-71	Hist2h2ac	7
1.06032e-73	0.363476	0.412	0.028	1.75058e-69	Blm	7
1.6825e-73	0.547847	0.632	0.067	2.7778e-69	Tfdp1	7
2.394e-72	0.258073	0.309	0.016	3.9525e-68	Wee1	7
2.03748e-71	0.499124	0.574	0.056	3.36388e-67	Mcm2	7
3.65527e-70	1.01869	0.897	0.165	6.03484e-66	Ezh2	7
8.7315e-70	0.348491	0.353	0.022	1.44157e-65	Gm42047	7
3.59773e-69	0.329034	0.338	0.02	5.93985e-65	Hist2h3b	7
2.6228e-68	0.731394	0.765	0.11	4.33025e-64	Mcm7	7
2.65153e-68	0.826368	0.809	0.127	4.37767e-64	Nsd2	7
6.00396e-68	0.38628	0.456	0.037	9.91254e-64	Haspin	7
9.11914e-68	0.696748	0.706	0.092	1.50557e-63	Rfc3	7
4.80382e-67	0.344988	0.412	0.031	7.93111e-63	Pold1	7
1.68304e-66	0.648378	0.647	0.081	2.7787e-62	Cmc2	7
1.1818e-65	1.09045	0.824	0.152	1.95115e-61	Cenpa	7
1.30043e-65	1.22122	0.941	0.232	2.147e-61	Dut	7
5.00473e-65	0.428701	0.5	0.046	8.26281e-61	Timeless	7
6.05538e-65	1.23499	1	0.289	9.99742e-61	Hmgn2	7
6.90156e-65	1.11755	0.765	0.126	1.13945e-60	Hist1h4h	7
1.50227e-64	0.674143	0.676	0.091	2.48024e-60	Dbf4	7
1.513e-64	0.465121	0.603	0.066	2.49796e-60	Anapc15	7
7.63751e-64	0.405597	0.456	0.04	1.26095e-59	Bora	7
9.88761e-64	0.60072	0.588	0.068	1.63244e-59	Hirip3	7
6.10687e-63	0.745591	0.721	0.108	1.00824e-58	Hist1h2bc	7
1.88154e-62	0.40881	0.441	0.038	3.10642e-58	Carhsp1	7
5.47803e-62	0.749337	0.824	0.137	9.04422e-58	Cbx5	7
2.1305e-60	0.719607	0.765	0.13	3.51746e-56	Hat1	7
5.09591e-60	0.350909	0.382	0.03	8.41335e-56	Chaf1b	7
2.09069e-58	0.928948	0.868	0.2	3.45172e-54	Dnmt1	7
3.14162e-58	0.304286	0.353	0.026	5.18681e-54	Ulbp1	7
6.54638e-58	0.592091	0.662	0.095	1.08081e-53	Siva1	7
6.62627e-57	0.3858	0.279	0.017	1.094e-52	Lgals3	7
7.21229e-57	1.25627	1	0.336	1.19075e-52	Tuba1b	7
7.1425e-56	1.08893	0.985	0.328	1.17923e-51	Tmpo	7
1.38442e-55	0.954225	0.912	0.237	2.28568e-51	Selenoh	7
1.81699e-55	0.330103	0.382	0.032	2.99985e-51	Cdc7	7
2.51066e-54	0.775602	0.574	0.076	4.1451e-50	Anxa2	7
3.00416e-54	0.790519	0.676	0.11	4.95986e-50	Fabp5	7
3.11051e-54	0.375757	0.382	0.033	5.13546e-50	Ska2	7
3.43727e-54	1.23712	1	0.394	5.67493e-50	Ube2s	7
4.0531e-54	0.281716	0.338	0.026	6.69167e-50	Rcc1	7
6.43256e-54	0.496827	0.426	0.042	1.06202e-49	Gm43305	7
9.27038e-54	0.800445	0.912	0.206	1.53054e-49	Tmem256	7
1.07403e-53	1.1829	1	0.441	1.77322e-49	H2afv	7
1.90508e-53	0.691302	0.721	0.12	3.14528e-49	Wdr76	7
2.80412e-53	0.475712	0.515	0.06	4.6296e-49	1700097N02Rik	7
9.20535e-53	0.390014	0.397	0.036	1.5198e-48	Atad5	7
4.82283e-52	0.291637	0.353	0.029	7.96248e-48	Rmi2	7
7.4794e-52	0.426483	0.529	0.062	1.23485e-47	Reep4	7
1.63433e-51	0.504147	0.588	0.078	2.69827e-47	Rnaseh2b	7
1.72657e-51	1.91066	0.971	0.366	2.85057e-47	Hist1h2ap	7
1.58973e-50	0.326775	0.368	0.032	2.62464e-46	Prim2	7
5.33804e-50	0.924294	0.838	0.202	8.8131e-46	Atad2	7
6.34975e-50	0.875946	0.897	0.234	1.04834e-45	Alyref	7
8.49316e-50	0.541349	0.662	0.102	1.40222e-45	Snrnp25	7
1.09081e-48	0.733949	0.838	0.179	1.80093e-44	Rangap1	7
1.69983e-48	0.584088	0.662	0.109	2.80643e-44	Ppil1	7
2.04008e-48	0.990119	1	0.404	3.36817e-44	Dbi	7
2.69418e-48	0.62383	0.721	0.129	4.44808e-44	Tceal9	7
2.7508e-48	0.68235	0.735	0.14	4.54157e-44	Mcm4	7
4.41251e-48	0.743787	0.868	0.203	7.28505e-44	Usp1	7
7.49417e-48	0.611077	0.603	0.09	1.23729e-43	Cdc25b	7
1.61932e-47	1.56793	1	0.672	2.67349e-43	Hmgb2	7
5.64082e-47	0.71206	0.765	0.156	9.31299e-43	Ckap5	7
9.13004e-47	1.0551	1	0.486	1.50737e-42	Nucks1	7
9.71141e-47	1.10003	1	0.56	1.60335e-42	Dek	7
3.21602e-46	0.611451	0.691	0.129	5.30965e-42	Prelid3b	7
3.90181e-46	1.1658	1	0.676	6.44189e-42	Tubb5	7
4.84498e-46	0.840282	0.882	0.232	7.99906e-42	Nasp	7
5.31554e-46	0.532502	0.676	0.111	8.77596e-42	Rpa3	7
1.17705e-45	0.943597	1	0.882	1.94331e-41	Hmgb1	7
1.4836e-45	1.12565	1	0.831	2.44942e-41	H2afz	7
1.75697e-45	0.739559	0.868	0.217	2.90076e-41	Lsm2	7
2.38904e-45	0.54675	0.662	0.111	3.9443e-41	Cisd1	7
2.72008e-45	0.369862	0.441	0.051	4.49086e-41	Cdk2	7
3.02687e-45	0.698606	0.765	0.165	4.99736e-41	Fkbp2	7
4.28738e-45	0.430101	0.515	0.068	7.07847e-41	Tubg1	7
4.75328e-45	0.762851	1	0.987	7.84767e-41	Ptma	7
5.9961e-45	0.468379	0.603	0.09	9.89956e-41	AI506816	7
6.99489e-45	0.597412	1	0.994	1.15486e-40	Ppia	7
1.01223e-44	0.943903	1	0.408	1.6712e-40	Calm3	7
1.19913e-44	1.01575	1	0.646	1.97977e-40	Ran	7
1.55867e-44	0.394494	0.515	0.068	2.57337e-40	Tex30	7
1.58753e-44	0.883424	0.794	0.202	2.621e-40	Slbp	7
2.43973e-44	1.23968	0.868	0.256	4.02799e-40	Hist1h4d	7
2.53682e-44	0.583133	0.662	0.12	4.18829e-40	Csrp1	7
2.99767e-44	1.25583	1	0.589	4.94915e-40	Lgals1	7
3.24775e-44	0.993572	0.985	0.552	5.36204e-40	Txn1	7
1.02406e-43	0.670719	0.735	0.154	1.69073e-39	Ncapd3	7
1.3973e-43	0.820878	1	0.848	2.30695e-39	Clic1	7
2.13236e-43	0.833559	0.868	0.259	3.52052e-39	Hpf1	7
5.27887e-43	0.532655	0.618	0.102	8.71542e-39	Dctpp1	7
5.84925e-43	0.300289	0.382	0.04	9.65712e-39	Rps6ka5	7
6.51749e-43	0.473301	0.515	0.073	1.07604e-38	E2f2	7
6.80142e-43	0.493441	0.588	0.092	1.12291e-38	Nelfe	7
9.3959e-43	0.570646	0.706	0.132	1.55126e-38	Acot7	7
1.40675e-42	0.682921	0.853	0.191	2.32255e-38	Pgp	7
1.64754e-42	0.373871	0.5	0.065	2.72008e-38	Stard4	7
2.31368e-42	0.985139	0.897	0.28	3.81988e-38	Pcna	7
2.68928e-42	0.829806	0.985	0.382	4.44001e-38	Snrpd1	7
4.41612e-42	0.939934	0.985	0.479	7.29101e-38	Nap1l1	7
4.83858e-42	0.688304	0.735	0.157	7.9885e-38	Mcm6	7
5.42279e-42	0.363347	1	1	8.95303e-38	Actb	7
7.31918e-42	0.254192	0.309	0.027	1.2084e-37	Cep128	7
7.99611e-42	1.25555	0.897	0.341	1.32016e-37	Hist1h1e	7
8.08498e-42	0.901585	1	0.721	1.33483e-37	Anp32b	7
1.8438e-41	0.612479	0.632	0.123	3.04411e-37	Topbp1	7
2.30481e-41	0.956807	0.941	0.376	3.80525e-37	Anp32e	7
2.6492e-41	0.658242	1	0.982	4.37384e-37	Actg1	7
2.80301e-41	0.836675	1	0.771	4.62776e-37	Hint1	7
4.94653e-41	0.723543	0.853	0.224	8.16672e-37	Fam111a	7
7.15434e-41	0.6183	1	0.95	1.18118e-36	Calm1	7
1.29055e-40	0.475441	0.529	0.082	2.1307e-36	Sdf2l1	7
1.33559e-40	0.909195	0.985	0.465	2.20507e-36	Ranbp1	7
1.48559e-40	1.05055	0.941	0.333	2.4527e-36	Tubb4b	7
1.69751e-40	0.647257	1	0.948	2.80259e-36	Oaz1	7
2.09706e-40	0.856793	0.853	0.264	3.46225e-36	Phgdh	7
2.54331e-40	0.591177	0.75	0.161	4.199e-36	Rfc2	7
2.89068e-40	0.950368	0.838	0.244	4.77252e-36	Hist1h1c	7
3.00924e-40	0.43679	0.544	0.081	4.96825e-36	Cdca7l	7
4.10304e-40	0.83108	0.971	0.38	6.77412e-36	Lsm5	7
5.02194e-40	0.315302	0.441	0.054	8.29123e-36	Crmp1	7
5.75628e-40	0.831906	1	0.8	9.50362e-36	Rbm3	7
7.66942e-40	0.84936	0.971	0.382	1.26622e-35	Pgk1	7
8.20337e-40	0.492369	0.632	0.11	1.35438e-35	Ncaph2	7
1.1343e-39	0.839422	1	0.629	1.87274e-35	Uqcr10	7
1.34005e-39	0.856774	0.971	0.422	2.21242e-35	Atpif1	7
1.38446e-39	0.814762	0.941	0.375	2.28574e-35	Mrpl18	7
1.64124e-39	0.750504	0.838	0.247	2.70969e-35	Anapc5	7
1.67266e-39	0.83265	0.971	0.454	2.76156e-35	Ywhah	7
2.90372e-39	0.613166	1	0.929	4.79405e-35	Hnrnpa2b1	7
2.99302e-39	0.791506	1	0.858	4.94147e-35	Ybx1	7
3.20983e-39	0.844362	1	0.653	5.29943e-35	Prdx1	7
4.06744e-39	0.250214	0.294	0.027	6.71534e-35	Wdhd1	7
4.60269e-39	0.672515	0.676	0.139	7.59904e-35	Tpi1	7
6.40992e-39	0.392637	0.485	0.067	1.05828e-34	Psat1	7
1.15119e-38	0.323502	0.441	0.056	1.90062e-34	Haus1	7
1.34401e-38	0.694903	1	0.822	2.21897e-34	Ndufa4	7
1.39424e-38	0.57094	1	0.969	2.3019e-34	Hspa8	7
2.2708e-38	0.60585	0.779	0.187	3.74909e-34	Sae1	7
3.84304e-38	0.769622	1	0.781	6.34487e-34	Snrpe	7
4.08155e-38	0.616776	0.75	0.172	6.73865e-34	Dtymk	7
4.65455e-38	0.581544	1	0.96	7.68466e-34	H3f3a	7
5.63243e-38	0.887418	0.985	0.571	9.29914e-34	Hnrnpab	7
7.76275e-38	0.834653	0.985	0.449	1.28163e-33	Smc1a	7
1.19208e-37	0.538261	1	0.978	1.96813e-33	Pfn1	7
1.33985e-37	0.665273	0.853	0.234	2.21209e-33	Nudt21	7
1.5123e-37	0.604665	0.824	0.205	2.49681e-33	Bex3	7
2.78122e-37	0.870243	0.971	0.463	4.5918e-33	Reep5	7
3.24642e-37	0.739682	1	0.732	5.35984e-33	Cox5b	7
4.08198e-37	0.879394	0.985	0.529	6.73935e-33	Sec11c	7
4.50552e-37	1.05927	0.971	0.627	7.43861e-33	Vim	7
5.5054e-37	0.734067	1	0.788	9.08942e-33	Cox7a2	7
5.7089e-37	0.265839	0.324	0.033	9.4254e-33	Myb	7
7.5688e-37	0.623149	1	0.946	1.24961e-32	Sh3bgrl3	7
8.78362e-37	0.574051	1	0.952	1.45017e-32	Cfl1	7
1.12748e-36	0.661789	1	0.894	1.86147e-32	Gnai2	7
1.29884e-36	0.388035	0.515	0.078	2.14438e-32	Raph1	7
1.32099e-36	0.450311	0.544	0.089	2.18095e-32	Dck	7
1.53176e-36	0.634188	0.868	0.235	2.52894e-32	Med30	7
1.98897e-36	0.59951	0.691	0.154	3.28378e-32	Dap	7
2.00927e-36	0.87261	1	0.856	3.3173e-32	Crip1	7
2.09915e-36	0.717778	1	0.685	3.4657e-32	Ndufb7	7
2.27577e-36	0.775059	1	0.749	3.7573e-32	Srsf3	7
2.34163e-36	0.620843	0.985	0.844	3.86602e-32	Cox6b1	7
2.68192e-36	0.295166	0.294	0.029	4.42785e-32	Syne2	7
2.72481e-36	0.340921	1	1	4.49866e-32	Rpsa	7
2.81342e-36	0.422515	0.529	0.085	4.64495e-32	Hmgn3	7
3.16172e-36	0.796552	1	0.832	5.22e-32	Gapdh	7
3.32818e-36	0.46737	1	0.986	5.49482e-32	Coro1a	7
4.72292e-36	0.760848	0.985	0.809	7.79755e-32	Hnrnpa3	7
5.4409e-36	0.609739	1	0.868	8.98293e-32	Cdc42	7
5.73239e-36	0.749072	0.824	0.246	9.46417e-32	Hjurp	7
5.99904e-36	0.422527	0.529	0.088	9.90442e-32	Zdhhc2	7
6.03468e-36	0.394751	1	1	9.96326e-32	Rpl41	7
7.87176e-36	0.669065	1	0.883	1.29963e-31	Cox8a	7
8.6669e-36	0.333174	0.426	0.057	1.4309e-31	Pmm1	7
9.79162e-36	0.448147	0.529	0.09	1.6166e-31	Cenpc1	7
1.16722e-35	0.70378	0.985	0.792	1.92708e-31	Sumo2	7
1.26512e-35	0.739879	1	0.488	2.08871e-31	Ywhae	7
1.38775e-35	0.771108	0.985	0.616	2.29118e-31	Cox5a	7
1.39588e-35	0.705397	1	0.771	2.30461e-31	Atp5k	7
2.00867e-35	0.634149	1	0.916	3.31632e-31	Cox6c	7
2.14369e-35	0.303022	1	0.999	3.53923e-31	mt-Co2	7
2.20234e-35	0.376079	0.471	0.07	3.63606e-31	Rbmx2	7
2.80356e-35	0.507593	1	0.966	4.62867e-31	H3f3b	7
3.12652e-35	0.575149	1	0.933	5.16189e-31	Snrpg	7
5.62646e-35	0.697257	1	0.778	9.28929e-31	Ppp1ca	7
7.2159e-35	0.572839	1	0.912	1.19135e-30	Elob	7
8.03612e-35	0.402464	0.559	0.094	1.32676e-30	Slc29a1	7
9.41838e-35	0.400684	1	0.999	1.55497e-30	Rps12	7
1.15323e-34	0.642021	1	0.805	1.90399e-30	Sem1	7
1.38214e-34	0.259448	0.338	0.038	2.28191e-30	Sass6	7
1.6901e-34	0.336635	0.441	0.062	2.79036e-30	Lmf2	7
2.8158e-34	0.680822	1	0.782	4.64889e-30	Atp5j	7
2.84321e-34	0.558832	1	0.957	4.69415e-30	Cox7c	7
2.9408e-34	0.717395	1	0.712	4.85527e-30	Slc25a5	7
3.21979e-34	0.568985	0.721	0.171	5.31587e-30	Trappc1	7
3.72466e-34	0.603415	1	0.893	6.14942e-30	Atp5j2	7
5.41517e-34	0.366769	0.412	0.057	8.94044e-30	Slfn9	7
7.3015e-34	0.618943	0.794	0.219	1.20548e-29	Ssna1	7
8.50485e-34	0.791823	0.985	0.635	1.40415e-29	Pkm	7
9.39026e-34	0.826016	0.882	0.325	1.55033e-29	Tagln2	7
1.00857e-33	0.578805	0.735	0.175	1.66514e-29	Commd1	7
1.27002e-33	0.49962	1	0.942	2.09681e-29	Cox4i1	7
1.28113e-33	0.718805	0.956	0.622	2.11514e-29	Gnb2	7
1.35177e-33	0.701594	0.956	0.424	2.23177e-29	Mapre1	7
1.45118e-33	0.392661	0.397	0.056	2.3959e-29	Cdca7	7
1.46711e-33	0.472378	1	0.959	2.4222e-29	Serf2	7
1.53331e-33	0.601748	1	0.853	2.5315e-29	Atp5g2	7
1.55964e-33	0.536195	1	0.887	2.57497e-29	Atp5l	7
3.7368e-33	0.382283	0.471	0.074	6.16946e-29	Ripk3	7
3.74185e-33	0.413292	1	0.994	6.1778e-29	Gm10076	7
3.82092e-33	0.399647	1	0.997	6.30834e-29	Rpl28	7
3.96437e-33	0.415164	0.544	0.096	6.54517e-29	Ift27	7
5.40627e-33	0.761062	1	0.691	8.92575e-29	Ldha	7
6.22209e-33	0.70141	1	0.714	1.02727e-28	Abracl	7
6.27349e-33	0.509474	1	0.961	1.03575e-28	Atp5e	7
7.17557e-33	0.573604	1	0.895	1.18469e-28	Serbp1	7
1.28139e-32	0.316331	1	0.999	2.11558e-28	H2-D1	7
1.48098e-32	0.655468	0.985	0.724	2.44509e-28	Atp5c1	7
1.57775e-32	0.711596	0.985	0.615	2.60486e-28	Pomp	7
1.61407e-32	0.274576	1	1	2.66483e-28	mt-Co3	7
1.65001e-32	0.337794	0.426	0.063	2.72416e-28	Nup62	7
1.84377e-32	0.517215	1	0.909	3.04407e-28	Atp5h	7
1.94343e-32	0.392996	0.441	0.069	3.20861e-28	Impa2	7
2.16739e-32	0.73401	0.941	0.425	3.57835e-28	Banf1	7
2.18453e-32	0.711095	0.971	0.579	3.60666e-28	Mrpl33	7
2.24853e-32	0.677043	0.971	0.435	3.71232e-28	Ndufb8	7
2.36611e-32	0.327728	0.456	0.068	3.90644e-28	Dhrs4	7
2.4859e-32	0.495857	1	0.969	4.10422e-28	Myl6	7
2.55695e-32	0.329036	0.338	0.042	4.22153e-28	Hist1h2ac	7
2.88965e-32	0.580176	0.735	0.197	4.77081e-28	Eri1	7
3.09222e-32	0.32245	0.5	0.079	5.10526e-28	Cdk2ap1	7
3.19612e-32	0.367253	1	0.999	5.2768e-28	Rplp0	7
3.43341e-32	0.681891	0.985	0.733	5.66856e-28	Pdia3	7
4.08491e-32	0.785784	1	0.688	6.74419e-28	Hsp90aa1	7
4.91e-32	0.465801	0.544	0.103	8.10641e-28	Cisd3	7
5.53087e-32	0.623853	0.779	0.221	9.13146e-28	Cnih4	7
6.39189e-32	0.717491	0.912	0.378	1.0553e-27	Nudc	7
6.56476e-32	0.69383	0.912	0.349	1.08384e-27	Ap2s1	7
6.91789e-32	0.575828	0.985	0.78	1.14214e-27	Rhoa	7
7.50182e-32	0.758944	1	0.68	1.23855e-27	Hsp90b1	7
7.97846e-32	0.731798	0.897	0.35	1.31724e-27	Slc25a4	7
8.8255e-32	0.547635	1	0.882	1.45709e-27	Sec61g	7
9.1e-32	0.273923	1	1	1.50241e-27	Tmsb10	7
9.37278e-32	0.717602	0.882	0.36	1.54745e-27	Hdgf	7
1.06907e-31	0.716687	0.897	0.382	1.76504e-27	Lsm6	7
1.13759e-31	0.441824	1	0.976	1.87816e-27	Arhgdib	7
1.15501e-31	0.707099	0.941	0.371	1.90692e-27	Tmem14c	7
1.33887e-31	0.63354	1	0.771	2.21048e-27	Snrpf	7
1.82016e-31	0.518388	0.735	0.184	3.00509e-27	Rpa1	7
1.82045e-31	0.733927	0.926	0.386	3.00556e-27	Rbbp7	7
1.85636e-31	0.694696	0.985	0.563	3.06485e-27	Snrpb	7
2.12315e-31	0.608578	0.971	0.831	3.50532e-27	Tma7	7
2.23179e-31	0.650445	0.662	0.161	3.68469e-27	Hist2h2aa1	7
2.31895e-31	0.766684	0.868	0.359	3.82858e-27	Lbr	7
2.42033e-31	0.45568	1	0.996	3.99596e-27	Cd52	7
2.48026e-31	0.710433	0.941	0.433	4.0949e-27	Manf	7
3.34717e-31	0.776241	0.838	0.307	5.52618e-27	Rad21	7
3.98962e-31	0.555752	0.735	0.18	6.58686e-27	Ybx3	7
4.02997e-31	0.458204	0.618	0.13	6.65349e-27	Ap1s1	7
4.93902e-31	0.715144	0.956	0.562	8.15432e-27	Atp5g3	7
5.37694e-31	0.273214	1	1	8.87733e-27	Eef1a1	7
6.79336e-31	0.730171	0.853	0.326	1.12158e-26	Ssrp1	7
6.84788e-31	0.537014	0.75	0.183	1.13059e-26	Elof1	7
7.83112e-31	0.64441	0.985	0.81	1.29292e-26	Atp5b	7
8.53456e-31	0.412235	0.603	0.118	1.40906e-26	Emc8	7
1.04666e-30	0.660772	1	0.781	1.72804e-26	Gnas	7
1.13787e-30	0.680365	0.985	0.673	1.87862e-26	Atp5f1	7
1.27676e-30	0.839761	0.971	0.544	2.10793e-26	1810037I17Rik	7
1.61947e-30	0.45646	0.618	0.131	2.67375e-26	Mrpl27	7
1.95506e-30	0.288303	0.309	0.037	3.2278e-26	Ttf2	7
2.00237e-30	0.526844	0.529	0.104	3.30591e-26	H1f0	7
2.03939e-30	0.588688	1	0.79	3.36703e-26	Hnrnpk	7
2.2885e-30	0.602852	1	0.832	3.77831e-26	Lcp1	7
2.4764e-30	0.629467	0.838	0.265	4.08854e-26	Lsm3	7
2.53623e-30	0.748954	0.956	0.565	4.18732e-26	Cbx3	7
2.84921e-30	0.316632	0.397	0.059	4.70405e-26	Metrn	7
3.18992e-30	0.614291	0.971	0.73	5.26657e-26	Atp5d	7
4.20025e-30	0.43489	1	0.969	6.93462e-26	Rac2	7
4.22222e-30	0.597188	0.735	0.211	6.97089e-26	Mtch1	7
4.42719e-30	0.468591	1	0.932	7.3093e-26	Ptprcap	7
4.70097e-30	0.598236	1	0.813	7.76129e-26	Tpm3	7
5.94055e-30	0.727539	1	0.893	9.80785e-26	S100a10	7
6.06268e-30	0.6442	0.794	0.245	1.00095e-25	Ddx39	7
6.15581e-30	0.420246	0.559	0.109	1.01632e-25	Gins4	7
6.86322e-30	0.562342	1	0.847	1.13312e-25	Actr3	7
1.05197e-29	0.426081	1	0.974	1.7368e-25	Ly6e	7
1.10489e-29	0.675759	0.971	0.665	1.82417e-25	Uqcrq	7
1.10736e-29	0.642221	1	0.699	1.82826e-25	Ppib	7
1.12381e-29	0.715813	0.985	0.681	1.8554e-25	Jpt1	7
1.1267e-29	0.589096	0.985	0.708	1.86017e-25	Sf3b2	7
1.13462e-29	0.397544	0.456	0.081	1.87325e-25	Rfwd3	7
1.25239e-29	0.29045	0.397	0.058	2.06769e-25	Dnaaf2	7
1.51846e-29	0.747181	0.985	0.626	2.50699e-25	Gmfg	7
1.66254e-29	0.303473	1	0.999	2.74486e-25	B2m	7
1.70282e-29	0.312573	0.426	0.065	2.81136e-25	Naa40	7
1.96311e-29	0.599931	0.985	0.814	3.2411e-25	Arpc1b	7
2.17417e-29	0.43871	1	0.99	3.58956e-25	Rps2	7
2.49632e-29	0.550714	0.985	0.801	4.12143e-25	Ndufa3	7
2.6283e-29	0.324287	0.471	0.079	4.33932e-25	Lrrc59	7
2.80606e-29	0.714443	0.897	0.425	4.6328e-25	Cbx1	7
2.89265e-29	0.838069	0.926	0.459	4.77576e-25	S100a11	7
2.90289e-29	0.745357	0.868	0.327	4.79267e-25	Dnajc9	7
2.9487e-29	0.430997	0.529	0.104	4.8683e-25	Fkbp5	7
3.69892e-29	0.599157	0.765	0.232	6.10692e-25	Casp8ap2	7
3.72744e-29	0.713278	0.882	0.336	6.154e-25	Erh	7
4.15759e-29	0.715578	0.912	0.4	6.86417e-25	Smc3	7
4.70843e-29	0.696492	0.941	0.431	7.77362e-25	Prelid1	7
5.49324e-29	0.63564	0.985	0.706	9.06934e-25	Arpp19	7
5.97086e-29	0.642813	1	0.7	9.85789e-25	Arpc5	7
6.66557e-29	0.385305	0.515	0.096	1.10049e-24	Asrgl1	7
6.77098e-29	0.542315	1	0.834	1.11789e-24	Ndufa13	7
7.45405e-29	0.462278	1	0.936	1.23066e-24	Psmb8	7
1.00947e-28	0.256198	0.309	0.038	1.66663e-24	Cntln	7
1.12885e-28	0.462355	0.588	0.123	1.86374e-24	Nudt4	7
1.40668e-28	0.740899	0.809	0.29	2.32243e-24	Cmtm7	7
1.52343e-28	0.434051	0.529	0.105	2.51519e-24	Ttc39c	7
1.71963e-28	0.433658	0.559	0.118	2.83911e-24	Nde1	7
1.78462e-28	0.427445	0.456	0.084	2.94641e-24	Gna15	7
2.04835e-28	0.613815	1	0.824	3.38183e-24	Ndufb1-ps	7
2.07578e-28	0.478929	0.632	0.143	3.4271e-24	Plp2	7
2.26964e-28	0.617933	0.75	0.211	3.74717e-24	Pgam1	7
2.3749e-28	0.735733	0.941	0.453	3.92096e-24	Serinc3	7
2.65958e-28	0.725054	0.971	0.497	4.39097e-24	Srsf2	7
3.07487e-28	0.662868	0.912	0.454	5.0766e-24	Exosc8	7
3.399e-28	0.590179	1	0.764	5.61175e-24	Atp5md	7
4.37622e-28	0.692652	0.956	0.474	7.22514e-24	Ube2l3	7
4.56011e-28	0.625884	0.971	0.733	7.52873e-24	Dynll1	7
4.73203e-28	0.540614	1	0.887	7.81258e-24	Hnrnpf	7
4.87104e-28	0.388858	1	0.983	8.04208e-24	mt-Nd1	7
4.9374e-28	0.674801	0.926	0.512	8.15164e-24	Psip1	7
4.99596e-28	0.342156	1	0.985	8.24833e-24	Fth1	7
5.03455e-28	0.787971	0.941	0.535	8.31204e-24	Pycard	7
5.08662e-28	0.394954	0.515	0.097	8.39801e-24	G2e3	7
5.12862e-28	0.331334	0.985	0.987	8.46736e-24	Eif1	7
5.95016e-28	0.519559	1	0.868	9.82372e-24	Tomm7	7
6.2987e-28	0.431621	0.574	0.126	1.03992e-23	Vars	7
7.31076e-28	0.67809	0.912	0.453	1.20701e-23	Pdap1	7
7.75103e-28	0.368927	0.5	0.094	1.27969e-23	Cdk5rap2	7
7.88452e-28	0.532727	0.838	0.242	1.30173e-23	Ptbp1	7
8.5724e-28	0.259998	0.368	0.053	1.4153e-23	Atl2	7
9.85059e-28	0.56728	0.735	0.213	1.62633e-23	Mif4gd	7
1.58134e-27	0.555662	0.779	0.227	2.61079e-23	Dpy30	7
1.68928e-27	0.502171	1	0.859	2.789e-23	Cyba	7
1.7458e-27	0.538488	1	0.842	2.88232e-23	Tle5	7
1.9441e-27	0.265934	0.353	0.051	3.20971e-23	Akip1	7
2.12986e-27	0.673853	0.956	0.56	3.5164e-23	Hnrnpa1	7
2.18285e-27	0.759643	0.912	0.452	3.60389e-23	Rps27l	7
2.21416e-27	0.60929	0.868	0.321	3.65557e-23	Fundc2	7
2.88826e-27	0.637229	0.956	0.463	4.76852e-23	Nono	7
2.97799e-27	0.604072	0.971	0.772	4.91667e-23	Hnrnpu	7
3.16829e-27	0.627437	0.868	0.327	5.23085e-23	Tkt	7
3.39648e-27	0.592733	0.985	0.852	5.60759e-23	Nme2	7
3.616e-27	0.622326	0.853	0.295	5.97001e-23	Srrt	7
3.98621e-27	0.578929	0.853	0.282	6.58123e-23	Dnajb11	7
4.3001e-27	0.674876	0.956	0.585	7.09946e-23	Ctcf	7
4.30247e-27	0.64458	0.912	0.427	7.10338e-23	Ndufc2	7
4.32552e-27	0.437424	1	0.939	7.14144e-23	Eef2	7
4.93484e-27	0.515917	1	0.838	8.14741e-23	Morf4l1	7
5.04858e-27	0.556032	0.618	0.149	8.33521e-23	Casp3	7
5.68309e-27	0.277303	0.368	0.054	9.38278e-23	Cenpj	7
5.79638e-27	0.358905	0.485	0.091	9.56983e-23	Ppih	7
6.10333e-27	0.656578	0.941	0.561	1.00766e-22	Micos10	7
7.1571e-27	0.616492	0.971	0.616	1.18164e-22	H2afy	7
7.72742e-27	0.540116	1	0.832	1.2758e-22	Chchd2	7
8.23382e-27	0.602741	1	0.674	1.3594e-22	Psmb9	7
8.44862e-27	0.423532	1	0.995	1.39487e-22	Ubb	7
9.92731e-27	0.63499	0.868	0.335	1.639e-22	Ube2m	7
1.0117e-26	0.696561	0.912	0.442	1.67031e-22	Rbbp4	7
1.06531e-26	0.633841	0.838	0.297	1.75882e-22	Suz12	7
1.22564e-26	0.323599	0.5	0.092	2.02354e-22	Ubr7	7
1.3548e-26	0.585941	0.824	0.279	2.23677e-22	Psmd13	7
1.40532e-26	0.573424	0.809	0.263	2.32018e-22	Vdac3	7
1.44331e-26	0.432994	0.632	0.147	2.38291e-22	Gars	7
1.71659e-26	0.656476	0.912	0.38	2.8341e-22	Baz1b	7
1.72427e-26	0.643718	0.779	0.261	2.84677e-22	Smco4	7
1.79826e-26	0.595008	0.809	0.282	2.96893e-22	Rtn3	7
1.87821e-26	0.463921	0.632	0.157	3.10092e-22	Aarsd1	7
2.30372e-26	0.433873	0.618	0.145	3.80344e-22	Dcp2	7
2.44361e-26	0.448907	1	0.927	4.0344e-22	Btf3	7
2.53239e-26	0.353247	0.456	0.083	4.18098e-22	Itgb3bp	7
3.03758e-26	0.64986	0.882	0.464	5.01505e-22	Ppp1cc	7
3.10616e-26	0.579335	0.824	0.256	5.12826e-22	Smarcc1	7
3.48087e-26	0.371755	0.485	0.095	5.74691e-22	Pdzd11	7
3.81197e-26	0.600226	1	0.701	6.29356e-22	Myl12a	7
3.98535e-26	0.292717	1	0.999	6.57981e-22	mt-Cytb	7
4.66874e-26	0.562642	0.824	0.296	7.70809e-22	Mrpl57	7
4.71028e-26	0.721649	0.926	0.473	7.77668e-22	Tpm4	7
4.71547e-26	0.347842	1	0.995	7.78523e-22	Rpl14	7
4.76924e-26	0.611389	0.853	0.366	7.87401e-22	Sdhb	7
4.92325e-26	0.537375	0.985	0.757	8.12829e-22	Eif3k	7
4.95669e-26	0.260036	1	1	8.1835e-22	Rps8	7
5.48955e-26	0.276356	0.324	0.046	9.06325e-22	E2f3	7
5.49242e-26	0.920438	0.941	0.545	9.06798e-22	Itgb1	7
5.97799e-26	0.61197	0.794	0.289	9.86967e-22	Hprt	7
6.11496e-26	0.636569	0.971	0.586	1.00958e-21	Ndufb11	7
6.20644e-26	0.637479	0.985	0.624	1.02468e-21	Capzb	7
6.71621e-26	0.637879	0.926	0.579	1.10885e-21	Ndufb9	7
7.11652e-26	0.406954	1	0.972	1.17494e-21	Rps17	7
7.39055e-26	0.296909	0.441	0.076	1.22018e-21	Rhno1	7
7.41451e-26	0.333212	1	0.99	1.22414e-21	Rpl29	7
7.53192e-26	0.613814	0.985	0.793	1.24352e-21	Set	7
7.59984e-26	0.470387	0.691	0.18	1.25473e-21	Bcl7c	7
7.60476e-26	0.596622	0.809	0.271	1.25555e-21	Vdac1	7
7.88772e-26	0.350069	0.426	0.077	1.30226e-21	Samd1	7
9.13076e-26	0.620019	0.912	0.435	1.50749e-21	Tmem167	7
1.08569e-25	0.619278	0.971	0.783	1.79247e-21	Emp3	7
1.12758e-25	0.305188	1	0.999	1.86163e-21	Rps26	7
1.20558e-25	0.300044	1	0.998	1.99041e-21	Rpl3	7
1.2912e-25	0.602359	0.882	0.359	2.13178e-21	Maz	7
1.29619e-25	0.597591	0.971	0.701	2.14001e-21	Atp5a1	7
1.30081e-25	0.612786	0.912	0.613	2.14763e-21	Ube2i	7
1.35788e-25	0.273889	1	1	2.24185e-21	Rps20	7
1.42129e-25	0.644497	0.985	0.608	2.34655e-21	Ndufa1	7
1.62039e-25	0.422751	0.632	0.147	2.67527e-21	Sept11	7
1.81474e-25	0.495451	0.632	0.171	2.99613e-21	Pnp	7
1.89948e-25	0.627931	1	0.668	3.13603e-21	Cotl1	7
1.90369e-25	0.361134	0.382	0.064	3.14299e-21	Marcksl1	7
1.92312e-25	0.566772	0.853	0.294	3.17507e-21	Eif4e2	7
2.03598e-25	0.623073	0.956	0.607	3.36141e-21	Rap1a	7
2.49881e-25	0.269827	0.324	0.047	4.12554e-21	Nup37	7
2.50066e-25	0.277189	1	0.997	4.12859e-21	Rpl22	7
2.52724e-25	0.457187	0.588	0.145	4.17247e-21	Pcnt	7
2.7265e-25	0.272238	0.397	0.065	4.50145e-21	Alad	7
3.33755e-25	0.468903	0.603	0.147	5.5103e-21	Rbmxl1	7
3.34524e-25	0.606398	0.809	0.269	5.52299e-21	AI662270	7
3.39373e-25	0.634921	0.926	0.419	5.60305e-21	Psmb2	7
3.61011e-25	0.619778	0.912	0.465	5.96029e-21	Selenof	7
3.85012e-25	0.566475	0.809	0.293	6.35655e-21	Ak2	7
4.11001e-25	0.376635	0.544	0.118	6.78563e-21	Timm50	7
4.17552e-25	0.423449	1	0.947	6.89378e-21	Rpl31	7
4.27129e-25	0.583597	0.985	0.738	7.0519e-21	Sept7	7
4.54785e-25	0.560581	0.985	0.686	7.5085e-21	Clta	7
4.64209e-25	0.617535	0.853	0.328	7.66409e-21	Eif1ax	7
4.66418e-25	0.574836	0.985	0.778	7.70057e-21	Ubl5	7
4.82138e-25	0.569893	0.985	0.722	7.96011e-21	Edf1	7
4.95796e-25	0.567034	0.765	0.253	8.18559e-21	Mrpl42	7
5.03359e-25	0.597364	0.824	0.286	8.31045e-21	0610010K14Rik	7
5.29158e-25	0.628455	0.956	0.506	8.7364e-21	Ndufs5	7
5.34628e-25	0.578165	1	0.74	8.8267e-21	Ywhaz	7
5.60608e-25	0.645145	0.897	0.403	9.25563e-21	Cntrl	7
5.85528e-25	0.649593	0.971	0.535	9.66707e-21	Smarca5	7
5.89398e-25	0.526794	1	0.962	9.73096e-21	Ifi27l2a	7
6.11265e-25	0.594876	0.985	0.736	1.0092e-20	Gpx4	7
6.9083e-25	0.645021	0.971	0.583	1.14056e-20	Cox6a1	7
7.3578e-25	0.597914	1	0.738	1.21477e-20	Slc25a3	7
8.0539e-25	0.508031	0.735	0.21	1.3297e-20	Mrpl13	7
8.11341e-25	0.658673	0.941	0.525	1.33952e-20	Lsm4	7
9.56538e-25	0.386994	0.471	0.097	1.57924e-20	Pold3	7
1.13563e-24	0.464787	1	0.902	1.87492e-20	Arpc2	7
1.26833e-24	0.30265	0.412	0.073	2.09401e-20	Apip	7
1.26919e-24	0.341373	0.515	0.103	2.09543e-20	Dtnbp1	7
1.2751e-24	0.559227	0.971	0.761	2.10519e-20	Arpc3	7
1.27808e-24	0.637096	0.956	0.624	2.11012e-20	Krtcap2	7
1.35325e-24	0.558972	0.779	0.262	2.23422e-20	Nsmce1	7
1.40574e-24	0.663231	0.956	0.515	2.32087e-20	Smdt1	7
1.47632e-24	0.664535	0.926	0.514	2.4374e-20	Hnrnpd	7
1.48293e-24	0.333636	1	0.993	2.44831e-20	Rpl10a	7
1.53488e-24	0.31035	1	0.996	2.53409e-20	Rack1	7
1.57511e-24	0.517438	0.794	0.26	2.6005e-20	Ddost	7
1.6781e-24	0.37345	1	0.979	2.77054e-20	Rpl7a	7
1.76288e-24	0.508332	0.779	0.229	2.91051e-20	Kpnb1	7
1.8427e-24	0.398417	0.529	0.12	3.0423e-20	Fh1	7
1.9142e-24	0.549823	0.765	0.266	3.16034e-20	Mrpl51	7
1.92491e-24	0.616869	0.926	0.555	3.17803e-20	Ssr4	7
2.00058e-24	0.64148	1	0.849	3.30296e-20	Arl6ip1	7
2.03548e-24	0.572584	0.971	0.649	3.36058e-20	Arf5	7
2.11256e-24	0.577488	0.985	0.699	3.48783e-20	Psma2	7
2.23821e-24	0.362447	1	0.966	3.69529e-20	Rpl36al	7
2.31608e-24	0.365172	0.485	0.1	3.82385e-20	Map2k3	7
2.56107e-24	0.651051	0.926	0.736	4.22833e-20	Calm2	7
2.58923e-24	0.427372	0.603	0.144	4.27482e-20	Ap3s1	7
2.59184e-24	0.256614	0.324	0.048	4.27913e-20	Saal1	7
2.71164e-24	0.340844	0.441	0.082	4.47692e-20	Tmem109	7
2.8513e-24	0.348793	0.515	0.105	4.70749e-20	Myef2	7
3.21592e-24	0.608781	1	0.629	5.30948e-20	Ywhab	7
3.40927e-24	0.598818	0.912	0.405	5.6287e-20	Gltp	7
3.52625e-24	0.318166	1	0.996	5.82185e-20	Rpl35	7
3.54899e-24	0.34661	0.485	0.096	5.85938e-20	Tdp2	7
3.80294e-24	0.587691	0.971	0.768	6.27865e-20	Sec61b	7
4.00314e-24	0.636997	0.882	0.504	6.60919e-20	Prdx2	7
4.2074e-24	0.319344	0.441	0.084	6.94642e-20	Creld2	7
4.34946e-24	0.411754	0.603	0.148	7.18096e-20	Kdelr2	7
4.67557e-24	0.36522	1	0.985	7.71937e-20	Naca	7
4.94539e-24	0.581291	0.868	0.348	8.16484e-20	Snrpc	7
5.18799e-24	0.421537	0.603	0.145	8.56538e-20	Med14	7
5.76385e-24	0.627301	0.838	0.385	9.51611e-20	Supt16	7
5.80707e-24	0.541811	0.838	0.294	9.58747e-20	Psmb7	7
5.82249e-24	0.443944	1	0.885	9.61294e-20	Pabpc1	7
6.03285e-24	0.486926	0.985	0.823	9.96024e-20	Msn	7
6.18629e-24	0.300209	1	0.996	1.02136e-19	Rps6	7
6.57964e-24	0.577945	0.853	0.354	1.0863e-19	Psma5	7
7.4671e-24	0.363002	0.515	0.111	1.23282e-19	Arl6ip6	7
7.66631e-24	0.566221	0.809	0.289	1.26571e-19	Tmco1	7
7.71372e-24	0.659506	0.956	0.438	1.27354e-19	Ndufc1	7
7.9007e-24	0.563506	0.971	0.719	1.30441e-19	Rbx1	7
9.04316e-24	0.41684	0.985	0.982	1.49303e-19	Hsp90ab1	7
9.18594e-24	0.635329	0.794	0.321	1.5166e-19	Pdia6	7
9.88341e-24	0.492728	0.706	0.208	1.63175e-19	Acadl	7
1.03249e-23	0.325941	0.471	0.093	1.70465e-19	Usp39	7
1.07045e-23	1.01217	0.75	0.314	1.76731e-19	S100a6	7
1.0747e-23	0.311343	0.426	0.079	1.77433e-19	Tfdp2	7
1.13062e-23	0.393326	0.603	0.141	1.86665e-19	Blvra	7
1.3556e-23	0.575438	0.971	0.559	2.2381e-19	Arhgdia	7
1.4359e-23	0.510591	0.676	0.186	2.37067e-19	Rora	7
1.48119e-23	0.252876	0.368	0.06	2.44545e-19	Haus6	7
1.86168e-23	0.454864	0.632	0.167	3.07364e-19	Ppp1r2	7
2.02472e-23	0.537032	0.882	0.315	3.34281e-19	Lman2	7
2.04463e-23	0.623124	0.926	0.511	3.37569e-19	Smchd1	7
2.09137e-23	0.267714	1	0.999	3.45285e-19	Rps5	7
2.20171e-23	0.380319	0.985	0.946	3.63502e-19	Uqcrh	7
2.81015e-23	0.529213	0.75	0.236	4.63955e-19	Impdh2	7
3.24958e-23	0.584267	0.912	0.406	5.36506e-19	Rnaseh2c	7
3.67454e-23	0.43288	0.662	0.178	6.06667e-19	Sdhd	7
3.84229e-23	0.553261	0.971	0.738	6.34362e-19	Psma7	7
3.94648e-23	0.376858	0.441	0.089	6.51563e-19	Slc22a15	7
4.39124e-23	0.319237	0.471	0.094	7.24993e-19	Mfsd10	7
4.40939e-23	0.315376	0.485	0.098	7.2799e-19	Cse1l	7
4.73978e-23	0.658695	0.824	0.356	7.82538e-19	Bub3	7
4.74751e-23	0.416499	0.574	0.137	7.83814e-19	Nxt1	7
5.22889e-23	0.705712	0.897	0.411	8.6329e-19	Ass1	7
5.82756e-23	0.56099	0.824	0.341	9.62131e-19	Srsf1	7
6.67745e-23	0.265983	0.338	0.055	1.10245e-18	Nudt1	7
6.75138e-23	0.415118	0.691	0.177	1.11465e-18	Gatad1	7
7.19919e-23	0.630521	0.956	0.607	1.18859e-18	Snrpd2	7
7.39109e-23	0.48789	0.794	0.254	1.22027e-18	Dazap1	7
7.4813e-23	0.593253	0.853	0.327	1.23516e-18	Etfb	7
7.71068e-23	0.559727	0.735	0.255	1.27303e-18	Kmt5a	7
7.82252e-23	0.392116	0.647	0.162	1.2915e-18	Bag6	7
9.60601e-23	0.514538	0.706	0.226	1.58595e-18	Cdk4	7
9.79285e-23	0.560286	0.75	0.251	1.6168e-18	Mthfd2	7
1.0687e-22	0.607612	0.897	0.409	1.76443e-18	Pbrm1	7
1.07249e-22	0.630786	0.956	0.567	1.77068e-18	S100a13	7
1.11736e-22	0.53207	0.765	0.262	1.84476e-18	Ssr2	7
1.14414e-22	0.352988	0.529	0.117	1.88897e-18	Calu	7
1.14649e-22	0.579759	0.956	0.676	1.89286e-18	Psmb3	7
1.17823e-22	0.357563	0.5	0.107	1.94526e-18	Cenpb	7
1.2504e-22	0.600072	0.691	0.224	2.06441e-18	Cdkn2d	7
1.26859e-22	0.429043	0.647	0.173	2.09444e-18	Usp14	7
1.30023e-22	0.508726	0.75	0.235	2.14669e-18	Yeats4	7
1.49087e-22	0.318604	0.441	0.088	2.46142e-18	Coro1c	7
1.5322e-22	0.42608	0.632	0.168	2.52966e-18	Ubl4a	7
1.57893e-22	0.5635	0.809	0.284	2.60682e-18	Psmd14	7
1.66821e-22	0.591235	0.779	0.319	2.75422e-18	Actn4	7
1.70628e-22	0.628069	0.926	0.519	2.81707e-18	Psmb4	7
1.75138e-22	0.322998	1	0.99	2.89153e-18	Rpl10	7
2.09718e-22	0.492591	0.721	0.227	3.46244e-18	Cs	7
2.10244e-22	0.581011	0.868	0.333	3.47114e-18	Eif4a3	7
2.20343e-22	0.455187	0.662	0.183	3.63787e-18	Larp7	7
2.30159e-22	0.59509	0.912	0.562	3.79993e-18	Psma4	7
2.34405e-22	0.537301	0.838	0.286	3.87003e-18	Eny2	7
2.42244e-22	0.538329	0.779	0.264	3.99945e-18	Snrpa1	7
2.44836e-22	0.30773	0.368	0.067	4.04224e-18	Mis18a	7
2.49094e-22	0.479338	0.632	0.181	4.11254e-18	Cbfb	7
2.73588e-22	0.477781	0.971	0.801	4.51695e-18	Psmb1	7
3.01071e-22	0.60622	0.897	0.558	4.97069e-18	Prkar1a	7
3.03011e-22	0.259648	0.382	0.067	5.00272e-18	D030056L22Rik	7
3.37904e-22	0.359395	1	0.975	5.57879e-18	Rpl4	7
3.5067e-22	0.53158	0.956	0.804	5.78955e-18	Anp32a	7
3.52874e-22	0.384898	0.603	0.148	5.82595e-18	Stoml2	7
3.53723e-22	0.534032	1	0.66	5.83996e-18	Nedd8	7
3.71452e-22	0.365743	0.529	0.12	6.13267e-18	Rnf168	7
3.76223e-22	0.579681	0.971	0.597	6.21144e-18	Smc6	7
3.99516e-22	0.579198	0.926	0.456	6.59602e-18	Eloc	7
4.1595e-22	0.575502	0.897	0.667	6.86733e-18	Uqcrb	7
4.67372e-22	0.644683	0.941	0.56	7.71632e-18	Cd48	7
4.88154e-22	0.385396	0.618	0.153	8.05942e-18	Nup50	7
5.06808e-22	0.503716	0.956	0.773	8.3674e-18	Ucp2	7
5.2671e-22	0.576836	0.868	0.436	8.69599e-18	Rbm8a	7
5.46109e-22	0.546596	0.676	0.203	9.01626e-18	Glrx	7
5.60422e-22	0.299096	0.412	0.079	9.25257e-18	Lin9	7
5.89763e-22	0.363613	0.559	0.131	9.73699e-18	Rabggtb	7
6.22735e-22	0.65477	0.912	0.707	1.02814e-17	Cox17	7
7.63514e-22	0.339344	0.456	0.096	1.26056e-17	Rbl1	7
8.15176e-22	0.330985	0.471	0.1	1.34586e-17	Agpat5	7
8.78037e-22	0.518901	0.838	0.291	1.44964e-17	Eif3l	7
9.79358e-22	0.553849	0.794	0.31	1.61692e-17	Cenpx	7
9.97315e-22	0.549551	1	0.823	1.64657e-17	Ncl	7
9.99207e-22	0.566832	0.824	0.329	1.64969e-17	Rnps1	7
1.02851e-21	0.580618	0.941	0.526	1.69807e-17	Metap2	7
1.03565e-21	0.571036	0.794	0.335	1.70985e-17	Magoh	7
1.03611e-21	0.539461	0.765	0.28	1.71061e-17	Naa38	7
1.04252e-21	0.646727	0.824	0.412	1.7212e-17	Flna	7
1.07278e-21	0.539548	0.971	0.691	1.77115e-17	Top1	7
1.15643e-21	0.383247	0.603	0.151	1.90927e-17	C1d	7
1.27684e-21	0.340447	0.515	0.116	2.10806e-17	Mpdu1	7
1.27753e-21	0.301349	0.471	0.097	2.1092e-17	Pole3	7
1.46099e-21	0.541488	0.971	0.575	2.41209e-17	Srp9	7
1.56906e-21	0.396505	0.544	0.13	2.59052e-17	Lxn	7
1.62672e-21	0.48697	0.985	0.827	2.68571e-17	Dnaja1	7
1.6632e-21	0.3695	0.5	0.115	2.74594e-17	Gsr	7
1.74303e-21	0.507145	0.985	0.78	2.87774e-17	Ndufa2	7
1.76026e-21	0.425962	1	0.946	2.90619e-17	Npm1	7
1.783e-21	0.549211	0.897	0.39	2.94373e-17	Wdr83os	7
1.78725e-21	0.566987	0.853	0.362	2.95074e-17	Cops6	7
1.7992e-21	0.351845	1	0.95	2.97048e-17	Itm2b	7
2.07935e-21	0.426861	1	0.913	3.43301e-17	Trac	7
2.22643e-21	0.549684	0.926	0.498	3.67583e-17	Mrps21	7
2.24308e-21	0.575645	0.853	0.387	3.70333e-17	Tcp1	7
2.28142e-21	0.614053	0.956	0.562	3.76662e-17	Iqgap1	7
2.29532e-21	0.282746	0.456	0.09	3.78958e-17	Slf1	7
2.30613e-21	0.498891	0.985	0.8	3.80743e-17	Ndfip1	7
2.32302e-21	0.354689	0.529	0.124	3.83531e-17	Ints11	7
2.32549e-21	0.354406	0.588	0.139	3.83939e-17	Idh3a	7
2.36414e-21	0.525928	0.735	0.245	3.90319e-17	Vrk1	7
2.38774e-21	0.587849	0.824	0.325	3.94216e-17	Sh3bgrl	7
2.57508e-21	0.4784	0.735	0.223	4.25146e-17	Rpn1	7
2.88088e-21	0.544556	0.941	0.644	4.75633e-17	Eif3c	7
3.2402e-21	0.524316	0.809	0.283	5.34956e-17	Rpn2	7
3.2406e-21	0.48936	0.632	0.195	5.35023e-17	Dynll2	7
3.26031e-21	0.533322	0.794	0.305	5.38278e-17	Tbcb	7
3.47352e-21	0.336947	0.515	0.115	5.73477e-17	Atp2b4	7
3.50793e-21	0.444795	0.632	0.186	5.7916e-17	Erg28	7
3.5804e-21	0.560254	0.838	0.391	5.91123e-17	Pfdn1	7
3.70213e-21	0.331065	1	0.986	6.11222e-17	Eef1b2	7
3.76947e-21	0.96479	0.691	0.265	6.2234e-17	S100a4	7
3.93036e-21	0.577571	0.941	0.557	6.48903e-17	D8Ertd738e	7
3.97879e-21	0.496607	0.676	0.208	6.56899e-17	Paics	7
4.2255e-21	0.384973	0.574	0.145	6.9763e-17	Pbdc1	7
4.38427e-21	0.513955	0.824	0.295	7.23844e-17	Phf5a	7
4.50537e-21	0.560474	0.765	0.313	7.43837e-17	Mrpl20	7
4.53811e-21	0.579534	0.971	0.598	7.49241e-17	Taf10	7
4.56279e-21	0.540226	0.838	0.358	7.53317e-17	Ube2n	7
4.63674e-21	0.567095	0.897	0.42	7.65527e-17	Bcap31	7
4.9383e-21	0.564012	0.912	0.5	8.15314e-17	Snx3	7
5.14771e-21	0.355161	0.5	0.118	8.49888e-17	Itpa	7
5.34469e-21	0.455465	0.676	0.199	8.82408e-17	Nt5c3b	7
5.5093e-21	0.568119	0.941	0.54	9.09585e-17	Sh3glb1	7
6.04976e-21	0.56858	0.824	0.366	9.98815e-17	Higd1a	7
7.18264e-21	0.570758	0.985	0.705	1.18585e-16	Srsf7	7
7.33453e-21	0.557976	0.926	0.581	1.21093e-16	Trir	7
7.52059e-21	0.585836	0.824	0.357	1.24165e-16	Hmgn1	7
8.50616e-21	0.483631	0.632	0.197	1.40437e-16	Ubald2	7
8.59657e-21	0.544157	0.941	0.592	1.41929e-16	Actr2	7
8.71778e-21	0.600711	0.971	0.66	1.43931e-16	Hspa5	7
8.76902e-21	0.430134	0.574	0.158	1.44777e-16	Nubp1	7
8.89928e-21	0.670309	0.882	0.411	1.46927e-16	Icos	7
8.96177e-21	0.30324	1	0.996	1.47959e-16	Rpl15	7
9.17837e-21	0.460845	0.662	0.201	1.51535e-16	Ube2a	7
9.30919e-21	0.253263	0.353	0.063	1.53695e-16	Txndc5	7
9.49397e-21	0.543448	0.882	0.447	1.56745e-16	Ndufs6	7
9.93081e-21	0.560123	0.926	0.392	1.63958e-16	Ndufv2	7
9.95887e-21	0.548979	0.897	0.454	1.64421e-16	Sf3b5	7
1.05703e-20	0.544279	0.794	0.313	1.74515e-16	Gng2	7
1.08782e-20	0.573689	0.779	0.308	1.79598e-16	Baz1a	7
1.17462e-20	0.402006	0.574	0.147	1.9393e-16	Capn2	7
1.25893e-20	0.435183	0.662	0.185	2.07849e-16	Xpo1	7
1.32456e-20	0.592762	0.912	0.492	2.18685e-16	Mdh1	7
1.38037e-20	0.484781	1	0.749	2.27899e-16	Spcs2	7
1.46383e-20	0.385516	0.662	0.176	2.41679e-16	Cdkn2aipnl	7
1.73201e-20	0.551179	0.912	0.524	2.85954e-16	Sarnp	7
1.73844e-20	0.263909	0.294	0.048	2.87017e-16	Myo1f	7
1.76899e-20	0.43005	0.706	0.197	2.92061e-16	Etfa	7
1.82354e-20	0.543327	0.824	0.36	3.01066e-16	Canx	7
2.16762e-20	0.375898	0.603	0.154	3.57874e-16	Sypl	7
2.26066e-20	0.560155	0.897	0.499	3.73236e-16	Arpc4	7
2.39424e-20	0.484181	0.691	0.231	3.95289e-16	Uba2	7
2.55106e-20	0.32632	1	0.953	4.21181e-16	Rbm39	7
2.63417e-20	0.524721	0.912	0.462	4.34901e-16	Hnrnpl	7
2.63425e-20	0.589516	0.926	0.546	4.34915e-16	Hp1bp3	7
3.25492e-20	0.540948	0.897	0.374	5.37388e-16	Psma1	7
3.27343e-20	0.283774	0.412	0.083	5.40444e-16	Nfatc2ip	7
3.41937e-20	0.314397	0.382	0.077	5.64538e-16	Rad18	7
3.59591e-20	0.479056	1	0.868	5.93684e-16	Rpl22l1	7
3.84549e-20	0.513183	0.941	0.53	6.3489e-16	Emg1	7
3.95912e-20	0.389172	0.662	0.182	6.5365e-16	Pycr2	7
4.00096e-20	0.541015	0.853	0.329	6.60558e-16	Rex1bd	7
4.14517e-20	0.588753	0.941	0.671	6.84368e-16	Tspo	7
4.16692e-20	0.577982	0.882	0.501	6.87958e-16	Luc7l3	7
4.90075e-20	0.567195	0.912	0.604	8.09114e-16	Mdh2	7
4.92844e-20	0.51101	1	0.773	8.13685e-16	Psme2	7
5.32029e-20	0.439007	0.559	0.156	8.78379e-16	Azin1	7
5.36786e-20	0.509144	0.765	0.268	8.86234e-16	Mrpl54	7
5.41346e-20	0.310424	0.382	0.077	8.93762e-16	Mphosph9	7
5.70576e-20	0.544763	0.897	0.4	9.42022e-16	Srsf10	7
5.91122e-20	0.559233	0.956	0.668	9.75943e-16	Ssb	7
6.42974e-20	0.469525	0.985	0.813	1.06155e-15	Cd5	7
6.48528e-20	0.418498	0.544	0.148	1.07072e-15	Cep57	7
6.72917e-20	0.565967	0.926	0.459	1.11099e-15	Slc9a3r1	7
6.75183e-20	0.30169	1	0.992	1.11473e-15	Rpl23a	7
6.89585e-20	0.57776	0.912	0.462	1.1385e-15	Thoc7	7
7.28526e-20	0.534058	0.897	0.51	1.2028e-15	Mbd2	7
7.34392e-20	0.375457	0.529	0.133	1.21248e-15	Uchl5	7
7.36714e-20	0.524871	0.853	0.339	1.21631e-15	Ubn1	7
7.76711e-20	0.594199	0.868	0.462	1.28235e-15	Prr13	7
7.97203e-20	0.390331	0.574	0.152	1.31618e-15	Mrpl28	7
7.99356e-20	0.584592	0.941	0.503	1.31974e-15	Psmc3	7
8.85086e-20	0.389766	0.603	0.159	1.46128e-15	Nudcd2	7
8.99414e-20	0.410128	0.412	0.094	1.48493e-15	Rpa2	7
9.27294e-20	0.54598	0.853	0.436	1.53096e-15	Mrps14	7
9.57119e-20	0.545618	0.882	0.417	1.5802e-15	Ywhaq	7
9.99595e-20	0.560407	0.926	0.434	1.65033e-15	Cox20	7
1.0597e-19	0.522467	0.765	0.286	1.74956e-15	Cdv3	7
1.12349e-19	0.471414	0.691	0.223	1.85489e-15	Tcerg1	7
1.15685e-19	0.456977	0.721	0.23	1.90997e-15	Snrnp40	7
1.1746e-19	0.545626	0.985	0.724	1.93927e-15	Sub1	7
1.26768e-19	0.555638	0.868	0.535	2.09293e-15	Atox1	7
1.27435e-19	0.472564	1	0.86	2.10395e-15	mt-Nd3	7
1.31691e-19	0.540099	0.985	0.661	2.17422e-15	H2afj	7
1.43057e-19	0.546306	0.941	0.502	2.36187e-15	Capza2	7
1.47374e-19	0.251861	1	0.997	2.43314e-15	Rpl7	7
1.5076e-19	0.569738	0.882	0.4	2.48904e-15	U2af1	7
1.51205e-19	0.543195	0.868	0.395	2.4964e-15	Srp19	7
1.55011e-19	0.498484	0.721	0.264	2.55923e-15	Asnsd1	7
1.55424e-19	0.565931	0.897	0.424	2.56606e-15	Psmd8	7
1.72955e-19	0.495016	0.971	0.645	2.85548e-15	Psma3	7
1.75577e-19	0.507419	0.824	0.317	2.89878e-15	Mrps18c	7
1.78895e-19	0.515029	0.868	0.365	2.95356e-15	Mphosph8	7
1.79193e-19	0.571962	0.794	0.349	2.95848e-15	Aebp2	7
1.93728e-19	0.547513	0.838	0.34	3.19845e-15	Mlec	7
2.32681e-19	0.554949	0.838	0.504	3.84157e-15	Raly	7
2.38343e-19	0.535871	0.956	0.58	3.93505e-15	Ndufv3	7
2.40642e-19	0.335989	0.456	0.107	3.97301e-15	Pih1d1	7
2.55068e-19	0.428856	0.662	0.208	4.21118e-15	Exosc3	7
2.59627e-19	0.420826	0.662	0.196	4.28645e-15	Smarcc2	7
2.68045e-19	0.591706	0.882	0.447	4.42542e-15	Stag1	7
2.82285e-19	0.534956	0.971	0.667	4.66053e-15	Ptp4a2	7
3.0637e-19	0.284382	0.368	0.073	5.05817e-15	Tubgcp2	7
3.26839e-19	0.331856	0.426	0.095	5.39611e-15	Fam92a	7
3.36658e-19	0.434925	0.971	0.836	5.55822e-15	Eif3h	7
3.36862e-19	0.495479	0.838	0.345	5.56158e-15	Eif2s1	7
3.40154e-19	0.534584	0.956	0.624	5.61594e-15	Cyb5a	7
3.44162e-19	0.55349	0.868	0.41	5.68212e-15	Bag1	7
3.45781e-19	0.563722	0.882	0.414	5.70885e-15	Aurkaip1	7
3.53186e-19	0.267529	0.324	0.059	5.83111e-15	Thoc6	7
3.55403e-19	0.468742	0.662	0.212	5.86771e-15	Atp2a2	7
3.7391e-19	0.564399	0.912	0.494	6.17325e-15	Ndufa11	7
3.81735e-19	0.535042	0.868	0.386	6.30244e-15	Abcf1	7
4.05956e-19	0.399129	0.574	0.165	6.70234e-15	Sumo3	7
4.16239e-19	0.35067	0.574	0.15	6.8721e-15	Pop7	7
4.35269e-19	0.449124	0.971	0.791	7.18629e-15	Sf3b1	7
4.65126e-19	0.573515	0.868	0.473	7.67924e-15	Sfr1	7
4.84042e-19	0.445986	0.676	0.211	7.99154e-15	Mlf2	7
4.87628e-19	0.553044	0.926	0.551	8.05074e-15	Thrap3	7
5.03259e-19	0.568687	0.897	0.487	8.3088e-15	Tnfaip8	7
5.51502e-19	0.365367	0.5	0.127	9.1053e-15	Hmgxb4	7
5.6401e-19	0.555227	0.897	0.496	9.31181e-15	Psmb6	7
5.80683e-19	0.26427	0.412	0.084	9.58707e-15	Pms2	7
5.98847e-19	0.326863	1	0.949	9.88696e-15	Fxyd5	7
6.00136e-19	0.52652	0.912	0.604	9.90824e-15	Cops9	7
6.21175e-19	0.49675	0.765	0.289	1.02556e-14	Vps29	7
6.2588e-19	0.398145	0.632	0.179	1.03333e-14	Rilpl2	7
6.98485e-19	0.462405	0.794	0.264	1.1532e-14	Psmd6	7
7.37352e-19	0.456933	0.632	0.195	1.21737e-14	Naa50	7
7.47212e-19	0.55368	0.882	0.418	1.23365e-14	Zfp91	7
7.52317e-19	0.551519	0.824	0.362	1.24208e-14	Ndufa12	7
7.68497e-19	0.398461	0.735	0.213	1.26879e-14	Ufm1	7
7.76089e-19	0.39906	0.529	0.147	1.28132e-14	Cep295	7
8.14747e-19	0.415684	0.603	0.173	1.34515e-14	Oxct1	7
9.29031e-19	0.315531	0.412	0.093	1.53383e-14	Mrpl49	7
9.30947e-19	0.559845	0.897	0.425	1.53699e-14	Rdx	7
9.98704e-19	0.518638	0.779	0.337	1.64886e-14	Hnrnpul1	7
1.02713e-18	0.351905	0.559	0.144	1.69579e-14	Cpsf2	7
1.03177e-18	0.588207	0.882	0.616	1.70345e-14	Calr	7
1.04707e-18	0.552459	0.882	0.405	1.72872e-14	Psma6	7
1.10654e-18	0.509515	0.838	0.391	1.8269e-14	Mrps24	7
1.18794e-18	0.492051	0.956	0.664	1.96128e-14	Tmem50a	7
1.26995e-18	0.283245	1	0.993	2.09669e-14	Rps25	7
1.34098e-18	0.566019	0.838	0.458	2.21396e-14	Vdac2	7
1.3569e-18	0.532597	0.882	0.435	2.24025e-14	Wdr1	7
1.46805e-18	0.526288	0.603	0.196	2.42375e-14	Cd74	7
1.47702e-18	0.286062	0.471	0.106	2.43857e-14	Mta1	7
1.52549e-18	0.372046	0.618	0.169	2.51858e-14	Tmem9b	7
1.56813e-18	0.348482	0.559	0.146	2.58898e-14	Ttc7	7
1.5758e-18	0.481861	0.971	0.722	2.60164e-14	Eif2s2	7
1.63091e-18	0.450182	0.691	0.23	2.69263e-14	Dok2	7
1.7581e-18	0.54669	0.882	0.448	2.90262e-14	Nap1l4	7
1.79846e-18	0.433528	0.588	0.176	2.96925e-14	Snhg6	7
1.82975e-18	0.463576	0.676	0.242	3.02092e-14	Cmpk1	7
1.86886e-18	0.489252	0.956	0.674	3.08549e-14	Tmbim6	7
1.91937e-18	0.559653	0.912	0.483	3.16888e-14	Prpf40a	7
1.92148e-18	0.55004	0.912	0.507	3.17236e-14	Grb2	7
2.01926e-18	0.579773	0.912	0.511	3.33379e-14	Grk2	7
2.16926e-18	0.571101	0.882	0.437	3.58144e-14	Arpc5l	7
2.18816e-18	0.493836	0.765	0.272	3.61266e-14	Ilf2	7
2.19119e-18	0.513718	0.824	0.335	3.61765e-14	Gtf2h5	7
2.20049e-18	0.572128	0.824	0.351	3.63301e-14	Ostf1	7
2.26094e-18	0.516438	0.897	0.348	3.73281e-14	Ube2k	7
2.28136e-18	0.354499	0.559	0.148	3.76653e-14	Eif1ad	7
2.3079e-18	0.511885	0.956	0.741	3.81034e-14	Cox7b	7
2.31733e-18	0.26911	0.426	0.092	3.82591e-14	Idh2	7
2.34433e-18	0.281352	0.471	0.106	3.87049e-14	Htatip2	7
2.36719e-18	0.532291	0.897	0.553	3.90824e-14	Bzw1	7
2.4662e-18	0.466226	0.662	0.239	4.0717e-14	Actl6a	7
2.48532e-18	0.48714	0.926	0.652	4.10326e-14	Sri	7
2.60495e-18	0.519297	0.868	0.436	4.30077e-14	Tsn	7
2.83419e-18	0.521175	0.897	0.509	4.67924e-14	Tmed9	7
2.94255e-18	0.511353	0.779	0.314	4.85815e-14	Anapc13	7
3.10388e-18	0.512529	1	0.791	5.1245e-14	Lsp1	7
3.43588e-18	0.470809	0.735	0.27	5.67263e-14	Rnf7	7
3.45815e-18	0.500366	0.809	0.386	5.7094e-14	Psmc6	7
3.45957e-18	0.497997	0.765	0.289	5.71175e-14	Lsm8	7
3.48893e-18	0.547241	0.838	0.374	5.76022e-14	Eif4h	7
3.60331e-18	0.545457	0.941	0.612	5.94907e-14	Rac1	7
4.09952e-18	0.461961	0.985	0.782	6.7683e-14	Cdk2ap2	7
4.31739e-18	0.465638	0.735	0.26	7.12802e-14	Nfyb	7
4.38348e-18	0.52867	0.838	0.356	7.23712e-14	Zcrb1	7
4.57471e-18	0.39388	0.662	0.198	7.55285e-14	Pon2	7
4.88348e-18	0.427469	0.603	0.183	8.06262e-14	Lyar	7
4.91284e-18	0.266709	0.397	0.084	8.11109e-14	Ddx19a	7
5.17494e-18	0.463867	0.676	0.227	8.54382e-14	Emd	7
5.2062e-18	0.463358	0.721	0.251	8.59543e-14	Mtpn	7
5.41967e-18	0.348034	0.529	0.137	8.94787e-14	Sinhcaf	7
5.4616e-18	0.538663	0.853	0.452	9.0171e-14	Tgfb1	7
5.7226e-18	0.393879	0.544	0.16	9.44801e-14	Nsmce2	7
5.79327e-18	0.503055	0.824	0.38	9.56469e-14	Capns1	7
5.89663e-18	0.528384	0.912	0.523	9.73534e-14	Ndufb5	7
5.97233e-18	0.413543	0.603	0.186	9.86032e-14	Blmh	7
6.25814e-18	0.303786	0.412	0.094	1.03322e-13	Get4	7
6.28933e-18	0.584526	0.882	0.572	1.03837e-13	Mif	7
6.5163e-18	0.433012	0.794	0.255	1.07584e-13	Rnh1	7
6.78609e-18	0.541152	0.824	0.411	1.12038e-13	Ptpn7	7
7.06153e-18	0.435732	0.588	0.171	1.16586e-13	Parp1	7
7.17137e-18	0.433391	0.75	0.261	1.18399e-13	Galnt1	7
7.33008e-18	0.495222	0.868	0.389	1.2102e-13	Taf15	7
7.37159e-18	0.536439	0.765	0.342	1.21705e-13	Rif1	7
7.44273e-18	0.370188	0.544	0.15	1.2288e-13	Ptpa	7
7.73948e-18	0.527281	0.941	0.617	1.27779e-13	Cct2	7
7.94136e-18	0.529544	0.912	0.602	1.31112e-13	Dnajc8	7
8.21139e-18	0.262924	0.426	0.093	1.3557e-13	Nfya	7
8.34137e-18	0.668216	0.882	0.564	1.37716e-13	Capg	7
8.41752e-18	0.479947	0.809	0.332	1.38973e-13	Naa10	7
8.56614e-18	0.528256	0.941	0.618	1.41427e-13	Polr1d	7
8.65269e-18	0.476366	0.824	0.32	1.42856e-13	Lamtor5	7
8.67443e-18	0.522802	0.853	0.416	1.43215e-13	Rer1	7
8.73628e-18	0.478042	0.765	0.3	1.44236e-13	Uba1	7
8.97617e-18	0.449317	0.691	0.241	1.48197e-13	Idh3g	7
9.37119e-18	0.324004	0.368	0.08	1.54718e-13	Fzr1	7
9.79114e-18	0.255719	0.382	0.078	1.61652e-13	Slc25a17	7
9.82874e-18	0.277148	1	0.995	1.62272e-13	Rpl36a	7
9.95798e-18	0.477617	1	0.835	1.64406e-13	Ikzf2	7
1.0032e-17	0.560332	0.971	0.677	1.65629e-13	Eif4a1	7
1.0132e-17	0.406451	0.676	0.208	1.67279e-13	Adprh	7
1.08402e-17	0.509671	0.765	0.282	1.78971e-13	Cldnd1	7
1.08444e-17	0.333618	0.515	0.133	1.79041e-13	Desi1	7
1.11085e-17	0.558455	0.956	0.615	1.83401e-13	Eif3a	7
1.12e-17	0.303428	0.426	0.099	1.84912e-13	Ehbp1l1	7
1.13565e-17	0.497457	0.912	0.497	1.87495e-13	Sec11a	7
1.14006e-17	0.500838	1	0.825	1.88223e-13	Srgn	7
1.19262e-17	0.51567	0.941	0.516	1.96901e-13	Ndufb10	7
1.21544e-17	0.477775	0.662	0.223	2.0067e-13	Rad50	7
1.24229e-17	0.542161	0.779	0.338	2.05102e-13	Pa2g4	7
1.26535e-17	0.33375	0.529	0.138	2.08909e-13	Gclm	7
1.27971e-17	0.557596	0.897	0.509	2.1128e-13	Sf3b6	7
1.31549e-17	0.50468	0.926	0.685	2.17187e-13	Pcbp2	7
1.42122e-17	0.430682	1	0.825	2.34643e-13	Tsc22d4	7
1.42995e-17	0.460571	0.779	0.269	2.36085e-13	Med10	7
1.45725e-17	0.441544	0.691	0.242	2.40592e-13	Polr2c	7
1.60483e-17	0.411025	0.574	0.176	2.64958e-13	Meaf6	7
1.63556e-17	0.378242	0.485	0.128	2.70031e-13	Fdps	7
1.67474e-17	0.445573	0.676	0.245	2.765e-13	Ufc1	7
1.71674e-17	0.466398	1	0.801	2.83433e-13	Mrpl52	7
1.7971e-17	0.529245	0.897	0.523	2.96701e-13	Scp2	7
1.8098e-17	0.480338	0.779	0.332	2.98798e-13	Dcun1d5	7
1.84166e-17	0.312467	0.441	0.106	3.04058e-13	Memo1	7
1.89883e-17	0.499567	0.824	0.336	3.13497e-13	Uqcrc1	7
1.93098e-17	0.515158	0.809	0.341	3.18805e-13	Akr1a1	7
1.9652e-17	0.497993	0.75	0.288	3.24454e-13	Snrpb2	7
1.97464e-17	0.456859	0.662	0.228	3.26013e-13	Acp1	7
1.98375e-17	0.386722	0.544	0.161	3.27516e-13	Snrpa	7
2.02631e-17	0.455458	0.603	0.196	3.34544e-13	Larp1b	7
2.34334e-17	0.487361	0.926	0.675	3.86886e-13	Pafah1b1	7
2.3776e-17	0.357133	0.456	0.114	3.92542e-13	Kpna3	7
2.41731e-17	0.261169	0.368	0.077	3.99098e-13	Plscr1	7
2.42497e-17	0.479557	0.838	0.36	4.00363e-13	Polr2k	7
2.43652e-17	0.355863	0.529	0.144	4.0227e-13	Myg1	7
2.47218e-17	0.562739	0.912	0.485	4.08158e-13	Psmb5	7
2.49379e-17	0.377279	0.559	0.16	4.11725e-13	Txnrd1	7
2.61547e-17	0.596628	0.912	0.527	4.31815e-13	Nme1	7
2.73896e-17	0.58663	0.794	0.424	4.52203e-13	Anxa6	7
2.77913e-17	0.531841	0.779	0.39	4.58835e-13	Dnajc2	7
2.78931e-17	0.303463	0.471	0.115	4.60515e-13	Ccdc127	7
2.93273e-17	0.553735	0.926	0.608	4.84194e-13	Tomm6	7
2.96507e-17	0.290097	0.485	0.116	4.89533e-13	Tbc1d10b	7
3.06263e-17	0.542957	0.853	0.475	5.0564e-13	Dynlrb1	7
3.0763e-17	0.537925	0.956	0.744	5.07896e-13	Eif5a	7
3.34725e-17	0.445038	0.985	0.761	5.5263e-13	Ube2d3	7
3.35737e-17	0.439571	0.971	0.825	5.54302e-13	Myh9	7
3.35892e-17	0.491787	0.824	0.366	5.54557e-13	Polr2j	7
3.36774e-17	0.541319	0.897	0.518	5.56014e-13	Pcbp1	7
3.39482e-17	0.283886	0.471	0.113	5.60484e-13	Hexb	7
3.63044e-17	0.429507	0.706	0.236	5.99386e-13	Rbm17	7
3.77213e-17	0.519026	0.926	0.578	6.22779e-13	Cct5	7
3.85795e-17	0.388878	0.603	0.176	6.36948e-13	Rbmx	7
3.97487e-17	0.270217	0.368	0.079	6.56251e-13	Cep57l1	7
4.09268e-17	0.442986	0.735	0.25	6.75701e-13	Cd44	7
4.12193e-17	0.313893	0.456	0.112	6.80531e-13	Ppp5c	7
4.43152e-17	0.556303	0.882	0.447	7.31644e-13	Snu13	7
4.49213e-17	0.279197	0.441	0.103	7.41651e-13	Tssc4	7
4.64041e-17	0.493533	0.971	0.67	7.66132e-13	Ndufa7	7
5.07068e-17	0.28371	0.485	0.118	8.3717e-13	Carnmt1	7
5.13951e-17	0.480407	0.735	0.286	8.48533e-13	Pcmt1	7
5.23674e-17	0.333181	0.485	0.125	8.64586e-13	Ugp2	7
5.34466e-17	0.56802	0.897	0.569	8.82404e-13	Srrm1	7
5.40814e-17	0.430729	0.618	0.206	8.92884e-13	Nup210	7
5.45761e-17	0.300319	0.456	0.111	9.01051e-13	Hsd17b12	7
5.57397e-17	0.538348	0.868	0.558	9.20263e-13	Cct7	7
5.634e-17	0.349978	0.544	0.148	9.30174e-13	Triobp	7
5.91861e-17	0.452026	0.691	0.266	9.77162e-13	Ndufs8	7
6.09076e-17	0.356716	0.529	0.145	1.00558e-12	Rfxap	7
6.11311e-17	0.434366	0.985	0.855	1.00927e-12	Tpr	7
6.29661e-17	0.273329	0.382	0.084	1.03957e-12	4930503L19Rik	7
7.02645e-17	0.40378	1	0.875	1.16007e-12	Jund	7
7.14241e-17	0.456918	0.706	0.254	1.17921e-12	Nans	7
7.78898e-17	0.504691	0.735	0.271	1.28596e-12	Eea1	7
8.19146e-17	0.557472	0.809	0.4	1.35241e-12	Tesc	7
8.23215e-17	0.541356	0.809	0.409	1.35913e-12	Sms	7
8.44743e-17	0.450761	0.676	0.229	1.39467e-12	A430093F15Rik	7
8.90489e-17	0.499573	0.794	0.321	1.4702e-12	Txnl1	7
9.04818e-17	0.302385	0.515	0.131	1.49386e-12	Leprot	7
9.27408e-17	0.508966	0.662	0.242	1.53115e-12	Rfc1	7
9.37733e-17	0.504837	0.897	0.603	1.5482e-12	Luc7l2	7
9.46028e-17	0.515767	0.809	0.363	1.56189e-12	Ostc	7
9.98806e-17	0.437561	0.971	0.803	1.64903e-12	Myl12b	7
1.01514e-16	0.528755	0.926	0.575	1.676e-12	Fkbp1a	7
1.01969e-16	0.532416	0.941	0.611	1.6835e-12	Uqcr11	7
1.03497e-16	0.357738	0.588	0.17	1.70873e-12	Trim28	7
1.10277e-16	0.522395	0.941	0.619	1.82067e-12	Atp5g1	7
1.11347e-16	0.535334	0.721	0.302	1.83833e-12	Dleu2	7
1.11392e-16	0.358066	0.529	0.151	1.83908e-12	Tusc3	7
1.11597e-16	0.359974	0.559	0.161	1.84247e-12	Kin	7
1.19154e-16	0.462002	0.75	0.297	1.96723e-12	Cyc1	7
1.2796e-16	0.311856	0.441	0.113	2.11262e-12	Ruvbl2	7
1.29772e-16	0.505669	0.926	0.551	2.14254e-12	Taldo1	7
1.29993e-16	0.386039	0.588	0.181	2.14619e-12	Mrpl40	7
1.37714e-16	0.410959	0.618	0.2	2.27366e-12	Pcbd2	7
1.45729e-16	0.266587	0.426	0.099	2.40598e-12	Rnf126	7
1.51341e-16	0.445385	0.971	0.868	2.49864e-12	Smc4	7
1.52402e-16	0.279399	0.426	0.102	2.51615e-12	Cfap20	7
1.54176e-16	0.352687	0.574	0.163	2.54545e-12	Psmg2	7
1.57809e-16	0.376288	0.544	0.159	2.60542e-12	Hmgcr	7
1.61948e-16	0.48821	0.882	0.53	2.67375e-12	Arf1	7
1.69225e-16	0.308466	0.485	0.122	2.79391e-12	Ap1s2	7
1.69603e-16	0.454165	0.765	0.302	2.80014e-12	Ppp4r3a	7
1.71207e-16	0.471328	0.809	0.314	2.82662e-12	Ppp4c	7
1.71279e-16	0.516731	0.956	0.617	2.82781e-12	Hnrnpm	7
1.74401e-16	0.524275	0.779	0.347	2.87937e-12	Psmc2	7
1.75599e-16	0.325807	0.515	0.137	2.89913e-12	Pgrmc2	7
1.83e-16	0.388649	0.956	0.887	3.02134e-12	Ftl1	7
1.84858e-16	0.537566	0.853	0.451	3.052e-12	Pdcd5	7
1.91347e-16	0.349514	0.544	0.156	3.15915e-12	Pom121	7
2.05101e-16	0.258123	0.324	0.067	3.38622e-12	Pold2	7
2.15098e-16	0.505213	0.926	0.541	3.55126e-12	Fis1	7
2.47673e-16	0.494369	0.897	0.528	4.08909e-12	Ost4	7
2.72796e-16	0.489584	0.824	0.345	4.50386e-12	Ndufa8	7
2.76054e-16	0.48139	0.912	0.652	4.55765e-12	Tmem258	7
2.9187e-16	0.488665	0.971	0.579	4.81878e-12	Srp14	7
2.99278e-16	0.338871	0.485	0.132	4.94108e-12	Prpf38a	7
3.03167e-16	0.532647	0.897	0.518	5.00528e-12	Xrn2	7
3.08204e-16	0.254074	0.338	0.07	5.08845e-12	Gnb4	7
3.08304e-16	0.347256	0.544	0.153	5.0901e-12	Srsf4	7
3.0882e-16	0.286348	0.426	0.103	5.09861e-12	Nmt2	7
3.09755e-16	0.531118	0.853	0.453	5.11405e-12	Ptges3	7
3.20879e-16	0.418384	0.985	0.803	5.29771e-12	Sept1	7
3.28129e-16	0.379773	0.559	0.176	5.41741e-12	Sfxn1	7
3.30483e-16	0.369875	1	0.886	5.45628e-12	Eif3f	7
3.38094e-16	0.478042	0.926	0.636	5.58193e-12	Atp6v1f	7
3.3899e-16	0.425779	0.662	0.235	5.59673e-12	Uchl3	7
3.54007e-16	0.286838	0.397	0.095	5.84466e-12	Rbm15	7
3.55119e-16	0.471738	0.926	0.714	5.86302e-12	Atp5mpl	7
3.6678e-16	0.296891	1	0.974	6.05554e-12	Cd3d	7
3.84176e-16	0.368297	0.603	0.188	6.34275e-12	Zc3h18	7
3.87958e-16	0.487359	0.809	0.392	6.40518e-12	Ppp1r11	7
4.12981e-16	0.481584	0.897	0.476	6.81831e-12	Lrrfip1	7
4.19397e-16	0.503271	0.926	0.631	6.92425e-12	Tra2b	7
4.26122e-16	0.388257	0.956	0.799	7.03528e-12	Pak2	7
4.49575e-16	0.304507	0.485	0.127	7.42248e-12	Prkrip1	7
4.50036e-16	0.531977	0.897	0.555	7.43009e-12	Itgb2	7
4.97581e-16	0.500527	0.794	0.36	8.21506e-12	Ndufb2	7
4.9876e-16	0.516083	0.868	0.51	8.23453e-12	Vamp8	7
5.28882e-16	0.355894	0.588	0.179	8.73185e-12	Nabp2	7
5.50895e-16	0.442491	0.809	0.325	9.09528e-12	Ola1	7
5.61584e-16	0.504961	0.956	0.662	9.27176e-12	Bola2	7
5.90516e-16	0.327723	1	0.936	9.74941e-12	mt-Nd4l	7
6.12806e-16	0.493571	0.838	0.449	1.01174e-11	Apobec3	7
6.7261e-16	0.322067	0.471	0.127	1.11048e-11	Msl3	7
7.16134e-16	0.320518	0.515	0.14	1.18234e-11	Psph	7
7.18558e-16	0.521329	0.956	0.687	1.18634e-11	Fus	7
7.43555e-16	0.381947	0.676	0.223	1.22761e-11	Srsf9	7
7.81372e-16	0.511446	0.941	0.66	1.29005e-11	Hnrnpa0	7
7.88232e-16	0.360001	0.632	0.193	1.30137e-11	Ppp2r2d	7
7.92962e-16	0.348727	0.5	0.144	1.30918e-11	Ccdc69	7
7.96712e-16	0.433666	0.706	0.249	1.31537e-11	Timm17a	7
8.13677e-16	0.343358	0.529	0.151	1.34338e-11	Cebpg	7
8.201e-16	0.516387	0.912	0.435	1.35398e-11	Esd	7
8.33362e-16	0.39529	1	0.873	1.37588e-11	Prrc2c	7
8.88225e-16	0.34787	0.529	0.155	1.46646e-11	Pank2	7
9.47119e-16	0.458954	0.971	0.711	1.56369e-11	Rock1	7
9.55301e-16	0.343976	0.515	0.142	1.5772e-11	Cep83	7
9.70424e-16	0.32167	0.456	0.125	1.60217e-11	Cdca4	7
1.01609e-15	0.462629	0.676	0.25	1.67756e-11	Nhp2	7
1.01831e-15	0.363358	0.544	0.167	1.68122e-11	Dcps	7
1.04962e-15	0.349307	0.529	0.159	1.73292e-11	Szrd1	7
1.10874e-15	0.478506	0.735	0.31	1.83052e-11	Ebp	7
1.1265e-15	0.493376	0.912	0.523	1.85985e-11	Ndufb3	7
1.13909e-15	0.409412	0.721	0.258	1.88063e-11	Timm8b	7
1.15749e-15	0.482738	0.868	0.457	1.91101e-11	Gnb1	7
1.15944e-15	0.501579	0.882	0.421	1.91424e-11	Fmnl1	7
1.17955e-15	0.529107	0.809	0.396	1.94743e-11	Cycs	7
1.18549e-15	0.351797	0.603	0.179	1.95725e-11	Tmem126a	7
1.24991e-15	0.379279	0.588	0.183	2.06361e-11	Gm28112	7
1.25799e-15	0.496155	0.824	0.383	2.07694e-11	Mat2a	7
1.26097e-15	0.325914	0.441	0.113	2.08185e-11	Bcl2a1d	7
1.27772e-15	0.411081	0.676	0.234	2.10951e-11	Esyt1	7
1.29818e-15	0.495832	0.853	0.492	2.14329e-11	Gdi2	7
1.4116e-15	0.370541	0.662	0.203	2.33055e-11	Dph3	7
1.4896e-15	0.503824	0.853	0.44	2.45934e-11	Swi5	7
1.61132e-15	0.485417	0.824	0.391	2.66028e-11	Syncrip	7
1.61678e-15	0.437642	0.691	0.274	2.6693e-11	Commd3	7
1.62437e-15	0.492332	0.75	0.39	2.68184e-11	Dctn3	7
1.62986e-15	0.481907	0.941	0.604	2.6909e-11	Ddx24	7
1.641e-15	0.451937	0.824	0.37	2.70929e-11	Cst3	7
1.68155e-15	0.519815	0.882	0.494	2.77625e-11	G3bp1	7
1.71289e-15	0.361883	0.5	0.154	2.82799e-11	Ncbp2	7
1.71345e-15	0.302422	1	0.96	2.82891e-11	H2-Q7	7
1.72658e-15	0.457381	0.824	0.335	2.85059e-11	Sod1	7
1.73384e-15	0.355909	0.441	0.122	2.86256e-11	Ebi3	7
1.78325e-15	0.458162	0.691	0.265	2.94414e-11	Anapc11	7
1.8109e-15	0.388322	0.662	0.232	2.98979e-11	Ssr1	7
1.8188e-15	0.462185	0.735	0.309	3.00284e-11	Nsmce4a	7
1.91683e-15	0.280628	0.426	0.106	3.16469e-11	Stard3nl	7
2.02378e-15	0.530314	0.882	0.606	3.34126e-11	Atp5o	7
2.03475e-15	0.307041	0.515	0.139	3.35937e-11	Rprd1b	7
2.27545e-15	0.48393	0.824	0.376	3.75677e-11	Dhx9	7
2.28771e-15	0.362128	0.618	0.205	3.777e-11	Ndufv1	7
2.64156e-15	0.489862	0.882	0.45	4.36122e-11	1110004F10Rik	7
2.79871e-15	0.471187	0.941	0.667	4.62067e-11	Park7	7
2.91489e-15	0.329718	0.588	0.171	4.81249e-11	Ccz1	7
2.95155e-15	0.493157	0.882	0.478	4.87301e-11	Zfp706	7
3.20094e-15	0.505368	0.853	0.453	5.28475e-11	Csnk2b	7
3.27678e-15	0.43875	0.765	0.297	5.40996e-11	Slirp	7
3.32136e-15	0.328725	1	0.923	5.48356e-11	Laptm5	7
3.32362e-15	0.411192	0.618	0.211	5.4873e-11	Map4	7
3.57542e-15	0.368928	0.588	0.191	5.90302e-11	Nptn	7
3.71683e-15	0.491121	0.735	0.339	6.13648e-11	Ndufb6	7
3.76262e-15	0.495079	0.912	0.5	6.21208e-11	Zc3h15	7
3.7767e-15	0.478577	0.941	0.629	6.23533e-11	Hnrnpc	7
4.09154e-15	0.383085	0.588	0.19	6.75513e-11	Mrpl17	7
4.17187e-15	0.499481	0.794	0.377	6.88775e-11	Pgls	7
4.30205e-15	0.480353	0.926	0.555	7.10268e-11	Capza1	7
4.41162e-15	0.390176	0.691	0.23	7.28359e-11	Zbtb8os	7
4.55255e-15	0.325063	0.559	0.164	7.51626e-11	Rnpep	7
4.68608e-15	0.512032	0.882	0.441	7.73671e-11	Tcea1	7
4.86825e-15	0.255939	1	0.985	8.03749e-11	Ptprc	7
4.89852e-15	0.498759	0.809	0.396	8.08746e-11	Mrfap1	7
4.94344e-15	0.508543	0.838	0.451	8.16162e-11	Hdac1	7
4.95151e-15	0.487253	0.956	0.621	8.17494e-11	Sfpq	7
5.12943e-15	0.306793	0.985	0.953	8.46869e-11	Mbnl1	7
5.42924e-15	0.466932	0.809	0.38	8.96368e-11	Mien1	7
5.44403e-15	0.378038	0.515	0.159	8.98809e-11	Hras	7
5.45299e-15	0.475696	0.882	0.411	9.00289e-11	Tmed2	7
5.53146e-15	0.277291	0.456	0.116	9.13244e-11	Tshz1	7
5.93078e-15	0.471456	0.735	0.337	9.79172e-11	Ciao2b	7
6.32803e-15	0.313517	1	0.982	1.04476e-10	Trbc2	7
6.59312e-15	0.43237	0.971	0.81	1.08852e-10	Lat	7
6.70145e-15	0.401244	0.515	0.175	1.10641e-10	Ddx1	7
6.74619e-15	0.466123	0.779	0.34	1.1138e-10	Psmd12	7
6.89367e-15	0.350409	0.529	0.164	1.13814e-10	Dera	7
6.95565e-15	0.352879	0.574	0.182	1.14838e-10	Tmx1	7
6.9676e-15	0.483423	0.838	0.378	1.15035e-10	Zfp207	7
7.8722e-15	0.360893	0.603	0.187	1.2997e-10	Dda1	7
7.96225e-15	0.458912	0.882	0.471	1.31457e-10	Ubap2l	7
8.03076e-15	0.478941	0.647	0.241	1.32588e-10	Tuba1a	7
8.33842e-15	0.427612	0.809	0.314	1.37667e-10	Pfdn6	7
8.52899e-15	0.320872	0.471	0.132	1.40814e-10	Anapc1	7
8.55495e-15	0.410369	0.971	0.765	1.41242e-10	Atrx	7
9.15205e-15	0.470705	0.544	0.18	1.511e-10	Odc1	7
9.3105e-15	0.439751	0.676	0.271	1.53716e-10	Cnot6	7
9.82701e-15	0.32013	0.5	0.144	1.62244e-10	Txlna	7
1.00732e-14	0.500549	0.882	0.489	1.66308e-10	Cwc15	7
1.01606e-14	0.404586	0.662	0.229	1.67751e-10	Mrps36	7
1.02266e-14	0.341616	0.985	0.919	1.68841e-10	Srrm2	7
1.05599e-14	0.327345	1	0.933	1.74343e-10	Cd3g	7
1.0579e-14	0.564977	0.868	0.433	1.74659e-10	Maf	7
1.07772e-14	0.345065	0.574	0.179	1.77932e-10	Mrpl41	7
1.11908e-14	0.479804	0.809	0.355	1.84761e-10	Wbp11	7
1.13843e-14	0.252887	0.426	0.106	1.87955e-10	Mrpl55	7
1.16258e-14	0.451437	0.765	0.332	1.91941e-10	Prmt1	7
1.23187e-14	0.351003	0.544	0.167	2.03381e-10	Cep250	7
1.25734e-14	0.394585	0.971	0.793	2.07587e-10	Cnn2	7
1.29722e-14	0.321709	0.5	0.143	2.1417e-10	Lman1	7
1.30177e-14	0.322501	0.5	0.147	2.14922e-10	Cdc34	7
1.3038e-14	0.477759	0.691	0.306	2.15258e-10	Rock2	7
1.35363e-14	0.448339	0.721	0.304	2.23485e-10	Stip1	7
1.37385e-14	0.31801	0.529	0.155	2.26823e-10	Lage3	7
1.38817e-14	0.32507	0.529	0.156	2.29187e-10	Ccdc25	7
1.45307e-14	0.46014	0.794	0.365	2.39902e-10	Uqcrfs1	7
1.46984e-14	0.40795	0.618	0.224	2.4267e-10	Fam129a	7
1.5242e-14	0.29447	0.5	0.14	2.51646e-10	Osgep	7
1.66016e-14	0.49923	0.897	0.539	2.74092e-10	Eif5b	7
1.6748e-14	0.360146	0.574	0.184	2.76509e-10	Got2	7
1.75495e-14	0.351679	0.544	0.175	2.89742e-10	Zcchc8	7
1.79009e-14	0.341011	0.559	0.175	2.95543e-10	Ubap2	7
1.81667e-14	0.298333	0.441	0.118	2.99931e-10	Jade1	7
1.83278e-14	0.495556	0.897	0.54	3.02591e-10	Kif5b	7
1.83322e-14	0.447263	0.853	0.475	3.02664e-10	Ccdc12	7
1.87504e-14	0.456361	0.897	0.523	3.0957e-10	Atp6v0c	7
2.01632e-14	0.459215	0.824	0.391	3.32894e-10	Tardbp	7
2.09617e-14	0.454894	0.779	0.338	3.46078e-10	Fkbp8	7
2.13303e-14	0.392355	0.647	0.228	3.52164e-10	Anxa5	7
2.14602e-14	0.457481	0.897	0.603	3.54308e-10	Psenen	7
2.15672e-14	0.442567	0.765	0.338	3.56075e-10	Tmod3	7
2.21966e-14	0.336289	0.559	0.169	3.66467e-10	Gps1	7
2.40328e-14	0.275587	0.397	0.104	3.96781e-10	Endod1	7
2.51219e-14	0.469936	0.897	0.627	4.14763e-10	Celf2	7
2.54352e-14	0.406784	0.618	0.224	4.19936e-10	Arl1	7
2.55648e-14	0.495109	0.956	0.662	4.22075e-10	Nol7	7
2.78374e-14	0.485976	0.838	0.429	4.59596e-10	Dnajc3	7
2.8008e-14	0.341828	0.426	0.121	4.62412e-10	Rdm1	7
2.83306e-14	0.412727	1	0.777	4.67739e-10	Tln1	7
2.86498e-14	0.376688	0.662	0.235	4.73008e-10	Sf3a3	7
2.91759e-14	0.475128	0.868	0.503	4.81695e-10	Romo1	7
3.05654e-14	0.450341	0.706	0.302	5.04634e-10	Psmd2	7
3.13461e-14	0.318263	0.574	0.172	5.17524e-10	Degs1	7
3.1375e-14	0.470064	0.897	0.554	5.18001e-10	Pabpn1	7
3.20671e-14	0.483065	0.882	0.467	5.29428e-10	Taf1d	7
3.22328e-14	0.276221	0.397	0.101	5.32163e-10	Slc35b1	7
3.3362e-14	0.360167	0.676	0.224	5.50806e-10	Adipor1	7
3.37641e-14	0.305095	0.5	0.143	5.57446e-10	Coro7	7
3.44929e-14	0.450276	0.912	0.623	5.69477e-10	Pnn	7
3.46375e-14	0.330566	0.559	0.17	5.71865e-10	Khsrp	7
3.60466e-14	0.460236	0.794	0.389	5.9513e-10	Cct6a	7
3.66286e-14	0.44741	0.721	0.313	6.04739e-10	U2af2	7
3.87955e-14	0.403838	0.676	0.257	6.40514e-10	Pdia4	7
3.94234e-14	0.472232	0.897	0.484	6.5088e-10	Tmem134	7
3.99168e-14	0.422628	0.618	0.234	6.59026e-10	Bola3	7
4.20683e-14	0.495865	0.882	0.463	6.94548e-10	Scaf11	7
4.25577e-14	0.29714	0.456	0.127	7.02627e-10	B3gat3	7
4.29316e-14	0.252202	0.441	0.113	7.08801e-10	Cox19	7
4.35893e-14	0.454721	0.676	0.288	7.1966e-10	Snx2	7
4.4594e-14	0.456415	0.956	0.623	7.36246e-10	Csnk2a1	7
4.80449e-14	0.460578	0.824	0.36	7.93222e-10	Ghitm	7
4.96612e-14	0.319633	0.603	0.186	8.19906e-10	Fam98b	7
5.00529e-14	0.456541	0.824	0.376	8.26373e-10	Gspt1	7
5.01351e-14	0.320198	0.559	0.171	8.2773e-10	Ube2j2	7
5.26294e-14	0.392642	0.662	0.251	8.68911e-10	Stub1	7
5.34026e-14	0.491972	0.882	0.471	8.81677e-10	Gpx1	7
5.39018e-14	0.36431	0.588	0.203	8.89919e-10	Mvb12a	7
5.46066e-14	0.289089	0.471	0.134	9.01555e-10	Traf2	7
5.72189e-14	0.461436	0.897	0.515	9.44684e-10	Ubxn1	7
5.73408e-14	0.452231	0.838	0.402	9.46697e-10	Spcs1	7
5.79717e-14	0.460371	0.691	0.315	9.57113e-10	Pds5a	7
5.86906e-14	0.252044	0.397	0.099	9.68982e-10	Dgcr8	7
5.91696e-14	0.312654	0.515	0.154	9.76889e-10	Ide	7
5.95954e-14	0.389349	0.618	0.23	9.83921e-10	Tpst2	7
6.00893e-14	0.351196	0.574	0.188	9.92074e-10	Ddb1	7
6.60113e-14	0.475539	0.735	0.341	1.08985e-09	Ppm1g	7
6.6059e-14	0.414363	0.75	0.275	1.09063e-09	Bnip2	7
6.70783e-14	0.38706	0.706	0.27	1.10746e-09	Ddt	7
6.83229e-14	0.457387	0.941	0.645	1.12801e-09	Atp6v0e	7
6.87216e-14	0.506622	0.882	0.65	1.13459e-09	Itgb7	7
6.99689e-14	0.501003	0.824	0.413	1.15519e-09	Caprin1	7
7.00799e-14	0.354599	0.603	0.201	1.15702e-09	Magt1	7
7.30995e-14	0.404254	0.662	0.239	1.20687e-09	Gng10	7
7.56568e-14	0.419211	0.735	0.325	1.24909e-09	Scamp3	7
7.76843e-14	0.434528	0.721	0.314	1.28257e-09	Pcnp	7
7.94064e-14	0.375121	0.603	0.214	1.311e-09	Ccdc124	7
8.53936e-14	0.480099	0.941	0.517	1.40985e-09	Cap1	7
8.62162e-14	0.478944	0.912	0.506	1.42343e-09	Ezr	7
8.62869e-14	0.365198	0.971	0.851	1.4246e-09	Gng5	7
8.90544e-14	0.365337	0.632	0.213	1.47029e-09	Vbp1	7
8.91274e-14	0.459054	0.779	0.353	1.47149e-09	Ccar1	7
9.0003e-14	0.444331	0.794	0.413	1.48595e-09	Dpm3	7
9.02909e-14	0.439849	0.676	0.274	1.4907e-09	Cuta	7
9.55301e-14	0.300244	0.456	0.128	1.5772e-09	Pgrmc1	7
9.55703e-14	0.38609	0.544	0.194	1.57787e-09	Taf1	7
9.57183e-14	0.303263	0.515	0.151	1.58031e-09	Sdhc	7
1.00181e-13	0.35333	0.618	0.21	1.65399e-09	Cdc123	7
1.00978e-13	0.464882	0.838	0.575	1.66714e-09	Eif3i	7
1.10017e-13	0.362585	0.559	0.188	1.81638e-09	Ivns1abp	7
1.1083e-13	0.487609	0.868	0.447	1.8298e-09	Ewsr1	7
1.12436e-13	0.314017	0.441	0.128	1.85631e-09	Oat	7
1.13966e-13	0.347077	0.618	0.202	1.88158e-09	Mrpl34	7
1.17344e-13	0.391241	0.721	0.283	1.93735e-09	Tmem208	7
1.18085e-13	0.264479	0.441	0.118	1.94959e-09	Sla2	7
1.1957e-13	0.475025	0.809	0.439	1.97411e-09	Ppp2ca	7
1.20923e-13	0.470634	0.897	0.648	1.99644e-09	Ubc	7
1.25936e-13	0.450699	0.706	0.3	2.07921e-09	Gabpb2	7
1.39349e-13	0.354659	0.647	0.218	2.30065e-09	Mta2	7
1.39649e-13	0.288875	0.412	0.112	2.3056e-09	Mzt1	7
1.40693e-13	0.286672	0.294	0.067	2.32284e-09	Tox2	7
1.42437e-13	0.44698	0.735	0.302	2.35164e-09	Eif6	7
1.48769e-13	0.45194	0.956	0.598	2.45618e-09	Srsf11	7
1.51036e-13	0.398432	0.971	0.786	2.4936e-09	Selenow	7
1.53476e-13	0.359394	0.647	0.231	2.53389e-09	Ppp2r1a	7
1.5693e-13	0.303943	0.5	0.149	2.59092e-09	Vma21	7
1.57013e-13	0.316804	0.529	0.167	2.59228e-09	Zwint	7
1.61862e-13	0.362464	0.544	0.186	2.67234e-09	Arpc1a	7
1.77241e-13	0.394889	0.618	0.224	2.92625e-09	Psmc1	7
1.84474e-13	0.379081	0.647	0.232	3.04566e-09	Eif4e	7
2.02471e-13	0.46604	0.706	0.318	3.3428e-09	Psmc4	7
2.04244e-13	0.417443	0.735	0.301	3.37206e-09	Srpr	7
2.17975e-13	0.411403	0.662	0.272	3.59876e-09	Ctdspl2	7
2.5243e-13	0.255029	0.397	0.105	4.16762e-09	Ak6	7
2.55525e-13	0.324186	0.456	0.136	4.21872e-09	Acsl5	7
2.6316e-13	0.349265	0.559	0.194	4.34476e-09	Pin1	7
2.75202e-13	0.384911	0.971	0.753	4.54358e-09	Dad1	7
2.8084e-13	0.26474	0.368	0.093	4.63666e-09	Tnfaip8l1	7
2.87343e-13	0.287599	0.441	0.125	4.74404e-09	Cep164	7
2.89028e-13	0.369457	0.647	0.236	4.77186e-09	Med8	7
2.93705e-13	0.452253	0.794	0.34	4.84907e-09	Polr2f	7
2.98986e-13	0.310488	0.309	0.075	4.93625e-09	Ifitm2	7
3.04326e-13	0.261062	0.426	0.115	5.02442e-09	Mindy3	7
3.35055e-13	0.413718	0.735	0.307	5.53175e-09	Cltc	7
3.51622e-13	0.348551	0.529	0.183	5.80528e-09	Trim27	7
3.68818e-13	0.285673	0.5	0.147	6.08919e-09	Pnkp	7
3.80482e-13	0.440765	0.706	0.322	6.28176e-09	M6pr	7
3.91801e-13	0.46005	0.882	0.598	6.46864e-09	Gpi1	7
3.96649e-13	0.45235	0.868	0.508	6.54868e-09	Cct4	7
3.99005e-13	0.454958	0.809	0.451	6.58758e-09	Cdc42se1	7
4.03195e-13	0.475412	0.735	0.347	6.65675e-09	Pole4	7
4.19338e-13	0.495771	0.75	0.348	6.92328e-09	Nop56	7
4.21535e-13	0.389075	0.75	0.298	6.95954e-09	Atxn2l	7
4.41099e-13	0.323479	0.588	0.19	7.28254e-09	Tmem165	7
4.56201e-13	0.275343	0.456	0.13	7.53188e-09	Zdhhc3	7
4.57818e-13	0.310729	0.559	0.175	7.55858e-09	Cd2bp2	7
4.62607e-13	0.340397	0.5	0.163	7.63764e-09	Akt1	7
4.7047e-13	0.342833	0.559	0.186	7.76746e-09	Vta1	7
4.72721e-13	0.437628	0.779	0.367	7.80462e-09	Brd8	7
4.7508e-13	0.373621	0.559	0.197	7.84357e-09	Hspa14	7
4.75487e-13	0.395132	0.691	0.272	7.85029e-09	Cetn2	7
4.81751e-13	0.374198	0.676	0.251	7.95371e-09	Mrps15	7
4.81885e-13	0.272388	0.441	0.123	7.95592e-09	Coro1b	7
4.90518e-13	0.394648	0.574	0.222	8.09845e-09	Snx5	7
4.99933e-13	0.469087	0.853	0.462	8.25389e-09	Plgrkt	7
5.04046e-13	0.407897	0.735	0.312	8.32181e-09	Bbip1	7
5.14077e-13	0.471933	0.882	0.535	8.48742e-09	Ndufa5	7
5.23569e-13	0.31618	0.515	0.164	8.64412e-09	Dpm2	7
5.52846e-13	0.494128	0.853	0.504	9.12749e-09	Rwdd1	7
5.55301e-13	0.354705	0.618	0.217	9.16802e-09	Tfam	7
5.69125e-13	0.489047	0.868	0.556	9.39625e-09	Eno1	7
5.87108e-13	0.372401	0.574	0.203	9.69315e-09	Eloa	7
5.97249e-13	0.447771	0.794	0.378	9.86057e-09	Txndc17	7
6.11018e-13	0.266362	0.412	0.115	1.00879e-08	Rnaseh2a	7
6.1259e-13	0.356537	0.691	0.233	1.01139e-08	Edem1	7
6.17529e-13	0.46883	0.941	0.532	1.01954e-08	Il2rb	7
6.35818e-13	0.442282	0.868	0.474	1.04973e-08	Diaph1	7
6.42143e-13	0.323733	0.529	0.17	1.06018e-08	Brcc3	7
6.42589e-13	0.339324	0.515	0.166	1.06091e-08	Atp2a3	7
6.75514e-13	0.362611	0.603	0.213	1.11527e-08	Psmd1	7
6.9118e-13	0.415104	0.926	0.684	1.14114e-08	Tbca	7
7.12122e-13	0.372536	0.691	0.265	1.17571e-08	Tmem128	7
7.33658e-13	0.414384	0.676	0.291	1.21127e-08	Gnai3	7
7.58387e-13	0.429237	0.735	0.288	1.2521e-08	Mpc1	7
7.62834e-13	0.465755	0.809	0.393	1.25944e-08	Ndufab1	7
7.68095e-13	0.283776	0.441	0.124	1.26812e-08	A430005L14Rik	7
7.80507e-13	0.345702	0.618	0.215	1.28862e-08	Hdlbp	7
7.89016e-13	0.325703	0.544	0.175	1.30267e-08	Trp53i11	7
8.04422e-13	0.38264	0.676	0.251	1.3281e-08	Snapc5	7
8.1931e-13	0.476885	0.868	0.454	1.35268e-08	Wasf2	7
8.21095e-13	0.427372	0.706	0.311	1.35563e-08	Ube2v1	7
8.66366e-13	0.47933	0.853	0.402	1.43037e-08	Pet100	7
9.25122e-13	0.316068	0.412	0.12	1.52738e-08	Ndufaf2	7
9.34954e-13	0.33824	1	0.877	1.54361e-08	Nsa2	7
9.36431e-13	0.423088	0.735	0.339	1.54605e-08	Psmd11	7
9.53888e-13	0.39287	0.985	0.785	1.57487e-08	Skap1	7
9.70249e-13	0.385585	0.647	0.249	1.60188e-08	Asxl1	7
9.86199e-13	0.452194	0.912	0.634	1.62821e-08	Cd6	7
1.03863e-12	0.418904	0.75	0.326	1.71478e-08	Mrpl21	7
1.12816e-12	0.425692	0.662	0.273	1.8626e-08	Vmp1	7
1.19248e-12	0.408727	0.706	0.295	1.96879e-08	Tuba4a	7
1.22249e-12	0.423377	0.691	0.291	2.01833e-08	Tiam1	7
1.24544e-12	0.429389	0.676	0.276	2.05622e-08	Gstp3	7
1.27708e-12	0.472722	0.897	0.553	2.10846e-08	Purb	7
1.28222e-12	0.373764	0.632	0.253	2.11695e-08	Appl1	7
1.39139e-12	0.271583	0.397	0.114	2.29719e-08	Nubp2	7
1.50934e-12	0.265205	0.471	0.137	2.49192e-08	Maea	7
1.51246e-12	0.387033	0.691	0.275	2.49708e-08	Kxd1	7
1.5376e-12	0.269402	0.5	0.145	2.53858e-08	Gpank1	7
1.53963e-12	0.451331	0.868	0.498	2.54192e-08	Tomm22	7
1.59124e-12	0.298711	0.456	0.14	2.62714e-08	Pspc1	7
1.60371e-12	0.331932	0.544	0.187	2.64773e-08	Lyrm2	7
1.66373e-12	0.442265	0.588	0.238	2.74682e-08	Myo1g	7
1.68587e-12	0.352316	0.632	0.23	2.78338e-08	Suds3	7
1.77404e-12	0.455541	0.824	0.462	2.92894e-08	Hnrnpr	7
1.83249e-12	0.339475	0.574	0.199	3.02545e-08	Egln1	7
1.95959e-12	0.345603	0.647	0.229	3.23528e-08	Hmg20b	7
1.98628e-12	0.32913	0.559	0.181	3.27935e-08	Elf4	7
2.00751e-12	0.307037	0.559	0.176	3.3144e-08	Derl1	7
2.00818e-12	0.315522	0.309	0.076	3.3155e-08	Ctla2a	7
2.26473e-12	0.273945	0.441	0.131	3.73906e-08	Acadvl	7
2.3227e-12	0.443937	0.882	0.547	3.83477e-08	Cct8	7
2.49356e-12	0.400241	1	0.885	4.11686e-08	AW112010	7
2.49565e-12	0.307673	0.426	0.127	4.12032e-08	Plcb4	7
2.59366e-12	0.299367	0.5	0.158	4.28214e-08	Ube2f	7
2.64513e-12	0.34778	0.618	0.223	4.36712e-08	Srek1	7
2.68697e-12	0.374779	0.676	0.257	4.43619e-08	Cib1	7
2.70182e-12	0.380888	0.603	0.216	4.4607e-08	Txnl4a	7
2.7753e-12	0.329405	0.662	0.222	4.58202e-08	Ergic2	7
2.81069e-12	0.439297	0.853	0.533	4.64045e-08	Selenok	7
2.90877e-12	0.413539	0.779	0.357	4.80237e-08	Cyfip2	7
2.92397e-12	0.288728	0.456	0.138	4.82748e-08	Ehmt2	7
3.14691e-12	0.388684	0.632	0.257	5.19555e-08	Mrpl32	7
3.34446e-12	0.32467	0.574	0.2	5.52171e-08	Rab1b	7
3.38178e-12	0.314147	0.529	0.181	5.58332e-08	Spg21	7
3.41123e-12	0.396505	0.691	0.281	5.63194e-08	Ccni	7
3.44007e-12	0.381148	0.75	0.289	5.67955e-08	Mrpl43	7
3.45897e-12	0.259983	0.456	0.133	5.71076e-08	Psen1	7
3.48261e-12	0.330841	0.5	0.168	5.74978e-08	Eftud2	7
3.50603e-12	0.414197	0.706	0.303	5.78845e-08	Ap2m1	7
3.53372e-12	0.426775	0.794	0.387	5.83417e-08	Frg1	7
3.58296e-12	0.42745	0.912	0.5	5.91547e-08	Khdrbs1	7
3.59324e-12	0.320735	0.485	0.163	5.93244e-08	Rars	7
3.62757e-12	0.349476	0.544	0.199	5.98911e-08	Lsm1	7
3.63673e-12	0.420017	0.926	0.651	6.00424e-08	Fkbp3	7
3.72662e-12	0.431594	0.779	0.38	6.15265e-08	Bsg	7
3.82647e-12	0.31784	0.559	0.186	6.3175e-08	Hnrnpll	7
3.93482e-12	0.446369	0.794	0.404	6.49638e-08	Uqcrc2	7
3.99394e-12	0.327669	0.912	0.895	6.594e-08	Limd2	7
4.11709e-12	0.400809	0.926	0.711	6.79732e-08	Prpf4b	7
4.11997e-12	0.28761	0.515	0.162	6.80207e-08	Tor1a	7
4.23774e-12	0.440996	0.794	0.456	6.9965e-08	U2surp	7
4.27253e-12	0.27189	0.471	0.14	7.05395e-08	Mrpl46	7
4.30036e-12	0.435163	0.735	0.371	7.09989e-08	Utp3	7
4.41783e-12	0.443119	0.824	0.38	7.29383e-08	Sptssa	7
4.43509e-12	0.400655	0.691	0.278	7.32233e-08	Pglyrp1	7
4.58126e-12	0.350055	0.926	0.776	7.56366e-08	Ncor1	7
4.60156e-12	0.405411	0.691	0.286	7.59717e-08	Ing1	7
4.62235e-12	0.334916	0.574	0.214	7.6315e-08	Taf12	7
4.63139e-12	0.259677	0.412	0.118	7.64642e-08	Dcaf15	7
4.6748e-12	0.292475	0.515	0.165	7.7181e-08	Hikeshi	7
4.68286e-12	0.436762	0.809	0.51	7.7314e-08	Vcp	7
4.73452e-12	0.436485	0.882	0.602	7.81669e-08	Rap1b	7
4.8917e-12	0.436841	0.941	0.589	8.0762e-08	Nop10	7
4.89355e-12	0.255414	0.382	0.106	8.07925e-08	Leo1	7
4.96429e-12	0.432052	0.838	0.508	8.19605e-08	Tap1	7
5.46104e-12	0.262363	0.441	0.129	9.01618e-08	Cndp2	7
5.54867e-12	0.268776	0.412	0.117	9.16085e-08	Casp1	7
5.55356e-12	0.271978	0.426	0.13	9.16893e-08	Ormdl2	7
5.9869e-12	0.374012	0.735	0.302	9.88437e-08	Mbd3	7
6.09051e-12	0.356789	0.397	0.122	1.00554e-07	Id2	7
6.12759e-12	0.282058	0.485	0.152	1.01166e-07	Cops3	7
6.15093e-12	0.292086	0.471	0.145	1.01552e-07	Ap1m1	7
6.17562e-12	0.375194	0.676	0.257	1.0196e-07	Adam10	7
6.65504e-12	0.341028	0.574	0.209	1.09875e-07	Ppid	7
7.04569e-12	0.361405	0.603	0.231	1.16324e-07	Reep3	7
7.08629e-12	0.399872	0.647	0.272	1.16995e-07	Rala	7
7.35349e-12	0.411799	0.779	0.373	1.21406e-07	Fip1l1	7
7.83528e-12	0.354335	0.618	0.225	1.29361e-07	Ppwd1	7
7.85577e-12	0.366575	0.676	0.265	1.29699e-07	Pstpip1	7
8.0316e-12	0.398676	0.735	0.31	1.32602e-07	Dap3	7
8.09302e-12	0.412414	0.721	0.324	1.33616e-07	Cript	7
8.47023e-12	0.379217	0.603	0.241	1.39843e-07	Kif2a	7
8.52963e-12	0.315604	0.515	0.174	1.40824e-07	Vps35	7
8.53618e-12	0.385121	0.647	0.258	1.40932e-07	Dnajc19	7
8.57819e-12	0.273613	0.485	0.15	1.41626e-07	Pfdn4	7
8.71155e-12	0.422755	0.676	0.298	1.43828e-07	Rbl2	7
8.73922e-12	0.429789	0.809	0.417	1.44285e-07	Hnrnpul2	7
8.7536e-12	0.460029	0.809	0.481	1.44522e-07	Timm13	7
8.92351e-12	0.325796	0.971	0.873	1.47327e-07	Gas5	7
8.93286e-12	0.368833	0.662	0.269	1.47482e-07	Cetn3	7
9.00555e-12	0.426324	0.912	0.606	1.48682e-07	Csnk1a1	7
9.13488e-12	0.328526	0.529	0.182	1.50817e-07	Pds5b	7
9.59239e-12	0.367222	0.662	0.256	1.5837e-07	Ssbp3	7
9.80549e-12	0.322556	0.559	0.19	1.61889e-07	Derl2	7
9.82744e-12	0.365419	0.647	0.244	1.62251e-07	Cnpy2	7
9.82929e-12	0.364136	0.662	0.26	1.62282e-07	Ramac	7
1.01676e-11	0.432223	0.824	0.523	1.67867e-07	Ppig	7
1.03204e-11	0.290059	0.456	0.145	1.7039e-07	Nipa2	7
1.04822e-11	0.424078	0.809	0.397	1.73062e-07	Lamtor4	7
1.08528e-11	0.353003	0.574	0.222	1.79179e-07	Timm17b	7
1.10734e-11	0.489827	0.809	0.535	1.82821e-07	Thy1	7
1.14146e-11	0.252282	0.426	0.124	1.88455e-07	Ipo7	7
1.18237e-11	0.268452	0.426	0.127	1.95209e-07	Adam17	7
1.21266e-11	0.410458	0.838	0.367	2.0021e-07	Rhog	7
1.23566e-11	0.394636	0.809	0.356	2.04008e-07	Sf1	7
1.27352e-11	0.379678	0.897	0.734	2.10258e-07	mt-Atp8	7
1.34858e-11	0.384132	0.618	0.254	2.2265e-07	Ctbp1	7
1.35566e-11	0.321375	0.471	0.16	2.2382e-07	Prkcsh	7
1.36791e-11	0.432464	0.868	0.524	2.25842e-07	Sltm	7
1.3691e-11	0.461982	0.735	0.381	2.26038e-07	Rrbp1	7
[truncated: 863 more rows]

## Sheet: Table S8 Ifng signature genes
gene
AC133103.3
AC168977.2
B2m
Camk2a
Camk2b
Camk2d
Camk2g
Cd44
Ciita
Fcgr1
Gbp10
Gbp11
Gbp2
Gbp2b
Gbp3
Gbp4
Gbp5
Gbp6
Gbp7
Gbp8
Gbp9
Gm43302
H2-Eb2
Icam1
Ifi30
Ifng
Ifngr1
Ifngr2
Irf1
Irf2
Irf3
Irf4
Irf5
Irf6
Irf7
Irf8
Irf9
Jak1
Jak2
Mid1
Mt2
Ncam1
Oas1a
Oas1b
Oas1c
Oas1d
Oas1e
Oas1f
Oas1g
Oas1h
Oas2
Oas3
Oasl1
Pias1
Pml
Prkcd
Ptafr
Ptpn1
Ptpn11
Ptpn2
Ptpn6
Socs1
Socs3
Sp100
Stat1
Sumo1
Trim10
Trim10
Trim14
Trim17
Trim2
Trim21
Trim25
Trim26
Trim26
Trim29
Trim3
Trim31
Trim35
Trim38
Trim45
Trim46
Trim5
Trim6
Trim62
Trim68
Trim8
Vcam1

## Sheet: Table S9 Antibodies
Antibodies	Conjugate		Source		Identifier	clone
B220	AF700		BioLegend		103232	RA3-6B2
B220	Biotin		Invitrogen		13-0452-85	RA3-6B2
B220	BUV395		BD Biosciences		563793	RA3-6B2
CD11b	PerCPCy5.5		BioLegend		101227	M1/70
CD11c	BV605		BioLegend		117333	N418
CD16/32	unconjugated		BioXcell		BE0008	2.4G2
CD127	PE		BioLegend		135010	A7R34
CTLA-4 (CD152)	APC		BD Biosciences		564331	UC10-4F10-11
CTLA-4 (CD152)	BV605		BioLegend		106323	UC10-4B9
CD172a	PECy7		BioLegend		144007	P84
CD25	PECy7		eBioscience		25-0251-81	PC61.5
CD25	BV650		BioLegend		102038	PC61
CD25	APC		BioLegend		102012	PC61
CD25	FITC		BD Biosciences		553071	7D4
CD279 (PD1)	APC		eBioscience		17-9985-82	J43
CD279 (PD1)	BV605		BD Biosciences		563059	J43
CD3	FITC		Tonbo		35-0031-U100	145-2C11
CD38	PECy7		BioLegend		102718	90
CD4	BUV395		BD Biosciences		563790	GK1.5
CD4	BV421		BioLegend		100543	RM4-5
CD44	BV785		BioLegend		103041	IM7
CD44	BV510		BioLegend		103043	IM7
CD44	PE		BioLegend		12-0441-82	IM7
CD44	BV711		BioLegend		103057	IM7
CD45.1	PerCPCy5.5		eBioscience		45-0453-82	A20
CD45.2	BV650		BioLegend		109836	104
CD62L	PECy7		eBioscience		25-0621	MEL-14
CD62L	PE		BioLegend		104407	MEL-14
CD62L	BV605		BioLegend		104437	MEL-14
CD62L	BV421		BioLegend		104435	MEL-14
CD62L	BV711		BioLegend		104445	MEL-14
CD64	FITC		BioLegend		139315	X54-5/7.1
CD8a	BUV737		BD Biosciences		564297	53-6.7
CD8a	PerCPCy5.5		eBioscience		35-0081-80	53-6.7
CD8a	Biotin		BioLegend		100704	53-6.7
CD80	APC		BioLegend		104713	16-10A1
CD86	BV785		BioLegend		105043	GL-1
CD95	BV510		BD Biosciences		563646	Jo2
CXCR3	BV786		BD Biosciences		741032	CXCR3-173
CXCR3	APC		eBioscience		17-1831-82	CXCR3-173
CXCR5	PEDazz		BioLegend		L138D7	L138D7
Foxp3	Ef450		eBioscience		48-5773-80	FJK-16s
Foxp3	PECy7		eBioscience		25-5773-80	FJK-16s
F4/80	Biotin		BioLegend		123106	BM8
F4/80	FITC		BioLegend		123107	BM8
FR4	PECy7		Thermofisher		25-5445-80	12A5
GFP	AF488		Biolegend		338008	FM264G
MHCII	BUV737		BD Biosciences		748845	M5/114.15.2
TCRb	FITC		BD Biosciences		35-5961	H57-597
XCR1	PE		BioLegend		148204	ZET
GATA3	BV421		BD Biosciences		563349	L50-823
IL-4	BV711		BD Biosciences		564005	11B11
IL-10	PE		BioLegend		505008	JES5-16E3
IL-17a	PE		eBioscience		17-7177-81	eBio17B7
IL-17a	eF450		Thermofisher		48-7177-82	eBio17B7
IFNγ	AF647		BD Biosciences		557735	XMG1.2
IFNγ	unconjugated		BioLegend		505834	XMG1.2
NOTCH1	PE		BioLegend		629105	mN1A
RORgt	APC		eBioscience		17-6981-80	B2D
STAT1	AF647		BD Biosciences		558560	Clone 1/Stat1
STAT1(Y701)	AF647		BD Biosciences		612597	4a
STAT5alpha/beta	unconjugated		Thermofisher		MA5-32452	JJ08-78
STAT5a (Y694)	AF647		BD Biosciences		612599	47/Stat5(pY694)
ZFP36L1	Unconjugated		Cell Signaling Technology		30894	Rabbit monoclonal
anti-Rabbit IgG	AF647		Jackson Immunoresearch		711-605-152	Donkey polyclonal
Streptavidin	BV421		BD Biosciences		563259
IgG2c	Unconjugated		Southern Biotech		1079-01	goat polyclonal
IgG2c	biotin		Southern Biotech		1079-08	goat polyclonal
IgE	Unconjugated		BD Biosciences		553413	R35-72
IgE	biotin		BD Biosciences		553419	R35-118
Streptavidin	HRP		Southern Biotech		7100-05
Totalseq oligo-conjugated antibodies
TotalSeq™-B0301 anti-mouse Hashtag 1 Antibody				BioLegend	155831	M1/42 ; 30-F11
TotalSeq™-B0302 anti-mouse Hashtag 2 Antibody				BioLegend	155833	M1/42 ; 30-F11
TotalSeq™-B0198 anti-mouse CD127 (IL-7Rα) Antibody				BioLegend	135055	A7R34
